# Supplementary material for: Species clustering, climate effects, and introduced species in 5 million city trees across 63 US cities
Source: eLife journal article supplement (doi:10.7554/elife.77891), 2022-09-14
Supplement: code3 [file Source_Code_File_3Calculate_Effective_Species_Excel_Tool.xlsx]

## Sheet: README Instructions
Using this file, you can calculate the effective species number for a given population. Effective species number is a robust measure of species diversity. To do so, navigate to the second tab title "Calculate Effective Species" (at the bottom of your screen). In column A, which is labeled "Paste your species below here," delete the sample data we included and paste your list of species. Each row …

## Sheet: Calculate Effective Species
Paste your species below here		Paste your species below here	count	frequency	effective species count
Abies balsamea		Abies balsamea	5	0.355815	4.2
Abies balsamea		Abies concolor	3	0.298627
Abies balsamea		Abies fraseri	1	0.160576
Abies balsamea		Acer buergerianum	7	0.367291
Abies balsamea		Acer campestre	2	0.244136
Abies concolor
Abies concolor
Abies concolor
Abies fraseri
Acer buergerianum
Acer buergerianum
Acer buergerianum
Acer buergerianum
Acer buergerianum
Acer buergerianum
Acer buergerianum
Acer campestre
Acer campestre
