# Supplementary material for: Species clustering, climate effects, and introduced species in 5 million city trees across 63 US cities
Source: eLife. 2022 Sep 27;11:e77891. doi: 10.7554/eLife.77891 (PMC9578703; doi:10.7554/eLife.77891)
Supplement: Figure 1—source data 2. — Here, we present all results by city, including number of trees, percent native, effective species count, environmental variables, sociocultural variables, and more. [file elife-77891-fig1-data2.csv]

filename_city	city_pretty	state	most_common_species	most_common_genus	Lat	Long	population	population_rank	number_trees	number_species	number_trees_filtered	Shannon_Wiener_Index	effective_species	max_abundance_most_common_species	max_abundance_most_common_genus	native_number_species	native_number_trees	native_Shannon_Wiener_Index	native_effective_species	number_trees_known_native_status	percent_native_trees	state_number_all_observed_species	state_number_native_species	shared_species_city_statenative	beta_diversity_city_statenative	nonnative_trees_NO_native_congener	nonnative_trees_YES_native_congener	nonnative_species_NO_native_congener	nonnative_species_YES_native_congener	nonnative_trees_PERCENTWITH_native_congeners	nonnative_species_PERCENTWITH_native_congeners	state_land_area_km2	number_species_iNext_all	number_species_asymest_all	number_species_asymest_SE_all	number_species_asymest_CIlower_all	number_species_asymest_CIhigher_all	effective_species_iNext_all	effective_species_asymest_all	effective_species_asymest_SE_all	effective_species_asymest_CIlower_all	effective_species_asymest_CIhigher_all	number_species_givenpop_all	number_species_givenpop_method_all	number_species_givenpop_CIlower_all	number_species_givenpop_CIhigher_all	effective_species_givenpop_all	effective_species_givenpop_method_all	effective_species_givenpop_CIlower_all
Albuquerque	Albuquerque	New Mexico	Ulmus pumila	Ulmus	35.0853336	-106.6055534	556495	32	2533	80	1943	3.53538086091016	34.308078832395	0.111168296448791	0.184328055217215	23	462	2.72402530460603	15.241550815156	1815	0.254545454545455	3993	3469	23	3503	815	538	21	10	0.397634885439763	0.32258064516129	314161	80	88.995	6.788	82.413	113.535	34.308	35.15	0.925	34.308	36.964	88.995	extrapolated	73.31	104.681	35.15	extrapolated	33.093
Anaheim	Anaheim	California	Magnolia grandiflora	Magnolia	33.8352932	-117.9145036	345012	56	79651	291	53793	3.95912791799083	52.4115988006994	0.0978937780008551	0.0980190378183689	22	1441	1.78523590691344	5.96098601953793	50104	0.0287601788280377	7264	5571	22	5818	36821	11842	108	23	0.243347101493948	0.175572519083969	403466	291	343.082	19.548	316.567	397.096	52.412	52.589	0.277	52.412	53.132	272.43	interpolated	263.138	281.723	52.336	interpolated	51.75
Arlington	Arlington	Texas	Ulmus crassifolia	Quercus	32.735687	-97.1080656	379577	50	14827	104	14391	3.44775900939294	31.4298792645103	0.109095962754499	0.284524057488023	61	10611	3.0982658551091	22.159490175842	13674	0.77599824484423	5685	4682	61	4664	1522	1541	14	17	0.503101534443356	0.548387096774194	676587	104	111.142	5.902	105.737	133.373	31.43	31.556	0.35	31.43	32.242	110.351	extrapolated	100.65	120.051	31.53	extrapolated	30.94
Atlanta	Atlanta	Georgia	Cercis canadensis	Quercus	33.7489954	-84.3879824	447841	40	41307	284	36703	4.04464457243052	57.0908907510678	0.11737460153121	0.167276782467454	125	24648	3.4849779316479	32.6217071945951	33192	0.742588575560376	4019	3173	125	3207	4302	4242	24	25	0.496488764044944	0.510204081632653	148959	284	317.017	13.166	299.55	354.103	57.091	57.354	0.42	57.091	58.177	284.346	extrapolated	275.11	293.582	57.093	extrapolated	56.431
AuroraCO	Aurora (CO)	Colorado	Gleditsia triacanthos	Gleditsia	39.7294319	-104.8319195	345803	55	57658	119	47218	3.06969263224111	21.5352824061358	0.220847981701893	0.190142771183196	18	3774	2.05952543146425	7.84224724329046	44018	0.0857376527784088	3298	2720	18	2803	16977	23267	27	16	0.578148295398072	0.372093023255814	268431	119	129.083	8	121.563	158.662	21.535	21.566	0.147	21.535	21.855	116.301	interpolated	112.399	120.202	21.527	interpolated	21.212
Austin	Austin	Texas	Carya illinoinensis	Quercus	30.267153	-97.7430608	885400	11	7295	103	5962	2.86545327862619	17.557009618414	0.153639718215364	0.33109694733311	43	4609	2.33008576951627	10.2788231049224	5715	0.806474190726159	5685	4682	43	4699	896	210	25	16	0.189873417721519	0.390243902439024	676587	103	120.997	9.603	109.747	151.003	17.557	17.752	0.323	17.557	18.385	120.98	extrapolated	102.209	139.75	17.751	extrapolated	17.148
Baltimore	Baltimore	Maryland	Acer rubrum	Acer	39.2903848	-76.6121893	622104	26	121296	305	109488	3.93411222220184	51.1167494915638	0.117912465293	0.216184846500137	108	61138	3.3115102698641	27.4265156489294	108591	0.563011667633598	3311	2119	108	2208	19673	27780	45	39	0.585421364297305	0.464285714285714	25142	305	333.016	11.435	317.98	365.47	51.117	51.199	0.2	51.117	51.591	254.965	interpolated	250.08	259.85	50.964	interpolated	50.53
Boston	Boston	Massachusetts	Pinus strobus	Pinus	42.3600825	-71.0588801	645966	24	1333	70	1302	3.12536286979695	22.7681554706679	0.205069124423963	0.240060015003751	33	1040	2.59566331190576	13.4054764250862	1217	0.85456039441249	3243	1793	33	1797	55	122	7	13	0.689265536723164	0.65	20202	70	106.722	22.767	82.008	182.297	22.768	23.745	0.964	22.768	25.635	106.722	extrapolated	66.766	146.677	23.745	extrapolated	22.131
Buffalo	Buffalo	New York	Acer platanoides	Acer	42.8864468	-78.8783689	258959	73	132995	192	68786	3.52430787077741	33.9302813480909	0.192844474166255	0.34408313057038	71	19385	2.96091478746719	19.3156333752894	63855	0.30357841985749	3827	2241	71	2291	12143	32327	29	31	0.726939509781875	0.516666666666667	122057	192	198.722	5.308	193.718	218.306	33.93	33.981	0.2	33.93	34.372	183.826	interpolated	179.95	187.701	33.887	interpolated	33.558
CapeCoral	Cape Coral	Florida	Sabal palmetto	Quercus	26.5628537	-81.9495331	165831	146	34287	106	29796	2.97294926068847	19.5494912033472	0.222580212109008	0.236066998762997	39	21956	2.06078312316076	7.85211657751928	27328	0.803425058548009	4433	2974	39	3002	4889	483	37	8	0.0899106478034252	0.177777777777778	138887	106	154.998	43.993	116.857	327.135	19.549	19.597	0.179	19.549	19.947	109.271	extrapolated	99.732	118.809	19.558	extrapolated	19.265
ColoradoSprings	Colorado Springs	Colorado	Pinus ponderosa	Pinus	38.8338816	-104.8213634	439886	41	25478	113	12769	3.17513774206341	23.9301158249053	0.150677421881118	0.192361903483455	19	3807	1.54136402839459	4.67095724594703	12557	0.303177510551883	3298	2720	19	2795	2888	5862	22	19	0.669942857142857	0.463414634146341	268431	113	137.044	13.309	121.728	179.232	23.93	24.067	0.264	23.93	24.585	133.129	extrapolated	114.946	151.312	24.045	extrapolated	23.586
Columbus	Columbus	Ohio	Fraxinus pennsylvanica	Acer	39.9611755	-82.9987942	822553	15	151937	227	119826	3.84766724462348	46.8835676734967	0.0784637724700816	0.254348966220259	79	72250	3.02770300487167	20.6497457064104	118463	0.609895072723129	3146	2041	79	2110	17768	28445	31	31	0.615519442581092	0.5	105829	227	239.033	7.223	231.057	262.69	46.884	46.932	0.183	46.884	47.291	201.759	interpolated	198.491	205.028	46.779	interpolated	46.318
Dallas	Dallas	Texas	Quercus virginiana	Quercus	32.7766642	-96.7969879	1257676	9	6218	48	6198	2.66017932084522	14.2988529511914	0.19974185221039	0.34102274560413	30	4535	2.14007365471298	8.50006367558049	6133	0.73944236099788	5685	4682	30	4670	745	853	6	4	0.533792240300375	0.4	676587	48	53.999	7.335	48.921	87.081	14.299	14.362	0.204	14.299	14.762	53.781	extrapolated	39.891	67.671	14.363	extrapolated	13.945
Denver	Denver	Colorado	Fraxinus pennsylvanica	Acer	39.7392358	-104.990251	649495	22	284739	290	271430	3.89699993409449	49.2544606009499	0.0948163430718786	0.145256471648686	38	35507	2.55465129782036	12.8668121897171	263035	0.134989640161956	3298	2720	38	2934	99094	128434	65	23	0.56447558102739	0.261363636363636	268431	290	320.083	19.273	299.531	384.949	49.254	49.284	0.127	49.254	49.532	243.864	interpolated	241.768	245.96	49.085	interpolated	48.782
DesMoines	Des Moines	Iowa	Fraxinus pennsylvanica	Acer	41.6005448	-93.6091064	207510	104	16875	70	13667	3.31595507687566	27.5486925431994	0.11399721958001	0.261626067700095	34	9866	2.87226115835511	17.6769434125023	12161	0.811281966943508	2274	1653	34	1655	690	1605	14	8	0.699346405228758	0.363636363636364	144669	70	74	5.291	70.557	98.718	27.549	27.624	0.261	27.549	28.136	73.274	extrapolated	67.53	79.019	27.611	extrapolated	27.124
Detroit	Detroit	Michigan	Populus	Quercus	42.331427	-83.0457538	688701	18	20963	84	16155	3.55171015000869	34.8729044195797	0.0789848344165893	0.123633641128026	36	8395	2.84660667167	17.2292181398128	14059	0.59712639590298	3099	2041	36	2053	2489	3175	13	15	0.56055790960452	0.535714285714286	146435	84	126.247	38.521	93.198	278.049	34.873	35	0.229	34.873	35.449	97.844	extrapolated	83.409	112.279	34.956	extrapolated	34.445
Durham	Durham	North Carolina	Lagerstroemia	Quercus	35.9940329	-78.898619	245475	82	16030	126	15394	3.27636674733349	26.4793913976829	0.201572041054956	0.265471804159121	65	8168	2.85435222922557	17.3631861994415	12199	0.669563078940897	3990	2931	65	2927	1358	2673	19	16	0.663110890597867	0.457142857142857	125920	126	156.081	19.272	135.531	220.944	26.479	26.617	0.346	26.479	27.296	143.685	extrapolated	129.951	157.419	26.58	extrapolated	25.922
Fresno	Fresno	California	Cedrus deodara	Quercus	36.7468422	-119.7725868	509924	34	6980	57	6069	3.08338957357386	21.8322792367297	0.123414071510957	0.264539121982828	7	883	1.06584049854859	2.90327815993371	5995	0.147289407839867	7264	5571	7	5614	2847	2265	19	14	0.443075117370892	0.424242424242424	403466	57	101.993	30.376	70.536	206.548	21.832	21.989	0.274	21.832	22.526	87.498	extrapolated	60.032	114.965	21.988	extrapolated	21.446
GardenGrove	Garden Grove	California	Lagerstroemia indica	Lagerstroemia	33.7739053	-117.9414477	175140	135	17522	210	17254	3.54332361100747	34.5816644014696	0.136663961979831	0.136088186067986	14	399	1.75879221269394	5.80542144404114	14870	0.0268325487558843	7264	5571	14	5753	11560	2911	92	24	0.201160942574805	0.206896551724138	403466	210	221.39	5.888	214.388	239.562	34.582	34.819	0.383	34.582	35.57	220.634	extrapolated	209.343	231.925	34.748	extrapolated	33.98
GrandRapids	Grand Rapids	Michigan	Acer platanoides	Acer	42.9633599	-85.6680863	192294	123	84361	155	67554	3.09786259322796	22.150555899696	0.302469135802469	0.485512357318671	61	32389	2.85950877455793	17.4529514967008	67355	0.480870017073714	3099	2041	61	2074	5509	29457	29	28	0.842446948464222	0.491228070175439	146435	155	169.222	9.341	159.397	200.998	22.151	22.179	0.134	22.151	22.443	144.548	interpolated	140.498	148.597	22.127	interpolated	21.854
Greensboro	Greensboro	North Carolina	Quercus phellos	Quercus	36.0726354	-79.7919754	279639	68	6589	335	4928	4.03274914102327	56.4157932248966	0.106128246753247	0.135430916552668	133	3358	3.36046928820809	28.8027044776809	4647	0.722616741984076	3990	2931	133	3000	523	766	69	42	0.594259115593483	0.378378378378378	125920	335	508.41	38.086	448.324	600.354	56.416	59.723	1.531	56.722	62.724	507.763	extrapolated	453.178	562.348	59.712	extrapolated	56.917
Honolulu	Honolulu	Hawaii	Cocos nucifera	Cocos	21.3069444	-157.8583333	347884	54	15440	216	14393	3.77601963850512	43.6419846849853	0.125825053845619	0.120180503019444	8	63	1.80949919182702	6.10738803636513	12249	0.00514327700220426	2930	1339	8	1539	10864	1322	128	14	0.108485146889874	0.0985915492957746	16635	216	251.018	14.344	232.183	291.776	43.642	44.053	0.573	43.642	45.176	245.451	extrapolated	227.832	263.07	43.965	extrapolated	43.002
Houston	Houston	Texas	Lagerstroemia indica	Quercus	29.7604267	-95.3698028	2195914	4	215139	198	207179	3.04391790338169	20.987308615399	0.213921295111956	0.315268211278725	88	125119	2.59771184385168	13.4329661189379	201662	0.620439150658032	5685	4682	89	4702	68483	8060	35	24	0.105300288726598	0.406779661016949	676587	198	205.2	5.446	199.926	224.91	20.987	20.998	0.079	20.987	21.154	165.757	interpolated	163.226	168.289	20.939	interpolated	20.796
HuntingtonBeach	Huntington Beach	California	Syagrus romanzoffianum	Syagrus	33.660297	-117.9992265	197575	117	55828	277	45010	3.88270825426354	48.5555379058165	0.103999111308598	0.103520721836437	29	1839	2.22017599798299	9.20895148015165	36294	0.0506695321540751	7264	5571	29	5790	24777	9678	101	21	0.280888114932521	0.172131147540984	403466	277	328.36	21.054	300.722	388.2	48.556	48.742	0.352	48.556	49.431	268.711	interpolated	260.14	277.282	48.518	interpolated	47.801
Indianapolis	Indianapolis	Indiana	Acer saccharum	Acer	39.768403	-86.158068	843393	12	98942	147	89598	3.73492628748372	41.8849380051336	0.0785955043639367	0.163349686815391	67	58945	3.25994331948192	26.0480606831009	80034	0.73649948771772	2865	2101	67	2114	8717	12372	18	22	0.586656550808478	0.55	92789	147	149.722	2.789	147.517	161.324	41.885	41.921	0.152	41.885	42.219	137.805	interpolated	134.599	141.01	41.833	interpolated	41.559
Irvine	Irvine	California	Pinus canariensis	Eucalyptus	33.6839473	-117.7946942	236716	85	58364	123	54821	3.59946487406113	36.5786550183066	0.083508144689079	0.243452370648618	11	5188	1.08452490804714	2.95803414663483	42485	0.122113687183712	7264	5571	11	5672	21760	15537	46	18	0.416575059656273	0.28125	403466	123	124.562	1.955	123.233	133.47	36.579	36.621	0.185	36.579	36.984	120.359	interpolated	117.275	123.444	36.558	interpolated	36.215
Jerseycity	Jersey City	New Jersey	Thuja occidentalis	Quercus	40.7281575	-74.0776417	257342	74	774	31	771	2.73971130202859	15.4825146804905	0.143968871595331	0.250645994832041	19	614	2.37052202017178	10.7029779964692	763	0.804718217562254	3207	2063	19	2056	38	111	7	4	0.74496644295302	0.363636363636364	19047	31	45.981	13.747	34.238	100.316	15.483	15.93	0.516	15.483	16.941	45.981	extrapolated	22.886	69.075	15.943	extrapolated	14.83
Knoxville	Knoxville	Tennessee	Acer rubrum	Acer	35.9606384	-83.9207392	183270	128	10000	137	7993	3.92641161669021	50.7246312802159	0.085449768547479	0.206043956043956	70	5536	3.36153320793668	28.8333645502476	7829	0.70711457401967	3102	2422	70	2419	1146	1147	17	21	0.500218054949847	0.552631578947368	106798	137	158.331	14.523	143.363	208.502	50.725	51.246	0.693	50.725	52.604	156.928	extrapolated	137.946	175.91	51.23	extrapolated	49.711
LasVegas	Las Vegas	Nevada	Pinus brutia	Pinus	36.1699412	-115.1398296	603488	30	39193	120	29771	3.20061383625471	24.5475937763767	0.197776359544523	0.21888369643915	13	7500	1.31574972060492	3.72754455488057	28077	0.267122555828614	3370	2948	13	3042	9862	10715	43	15	0.520727025319532	0.258620689655172	284332	120	157.499	29.685	129.556	267.145	24.548	24.611	0.196	24.548	24.995	123.471	extrapolated	114.826	132.116	24.56	extrapolated	24.073
LosAngeles	Los Angeles	California	Washingtonia robusta	Washingtonia	34.0522342	-118.2436849	3884307	2	720140	528	561662	4.28512381299504	72.6115364150207	0.0676047160035751	0.071074031232935	59	36634	2.0996920255159	8.16365532783563	492381	0.0744017336168536	7264	5571	61	5977	333840	121907	127	34	0.267488321371287	0.211180124223602	403466	528	541.729	6.59	533.623	561.516	72.612	72.648	0.141	72.612	72.925	369.392	interpolated	366.695	372.089	72.15	interpolated	71.888
Louisville	Louisville	Kentucky	Acer saccharum	Quercus	38.2526647	-85.7584557	609893	28	32711	227	32362	4.25293516764872	70.3114857670796	0.0559297942030777	0.224770642201835	103	27238	3.84395431578216	46.7098150880008	31418	0.866955248583615	2899	2086	103	2107	1780	2400	24	30	0.574162679425837	0.555555555555556	102269	227	248.124	10.847	235.185	281.522	70.311	70.595	0.456	70.311	71.489	230.416	extrapolated	222.055	238.777	70.349	extrapolated	69.414
Madison	Madison	Wisconsin	Acer platanoides	Acer	43.0730517	-89.4012302	243344	83	96042	99	75459	2.65033301020983	14.1587528696539	0.277210140606157	0.347588151653105	47	39817	2.17296201852458	8.7842646989132	71090	0.560092840061893	2698	1858	47	1863	2622	28651	14	18	0.916157707926966	0.5625	140268	99	100.6	2.161	99.217	110.791	14.159	14.168	0.086	14.159	14.337	94.742	interpolated	92.065	97.419	14.148	interpolated	14.006
Miami	Miami	Florida	Pinus elliottii	Eugenia	25.7616798	-80.1917902	417650	44	732	104	645	3.93295820568252	51.0577939426183	0.0713178294573643	0.0686813186813187	26	232	2.60615017027684	13.5467974695051	561	0.413547237076649	4433	2974	26	3026	284	45	44	6	0.13677811550152	0.12	138887	104	180.291	34.253	136.939	280.699	51.058	58.897	3.189	52.647	65.146	180.291	extrapolated	129.914	230.668	58.897	extrapolated	53.553
Milwaukee	Milwaukee	Wisconsin	Fraxinus pennsylvanica	Acer	43.0389025	-87.9064736	599164	31	32260	113	29246	3.40275021053243	30.0466210539994	0.117110032141148	0.210606769614725	53	19884	2.87839595802106	17.7857212429822	28800	0.690416666666667	2698	1858	53	1865	1549	7367	18	15	0.826267384477344	0.454545454545455	140268	113	119.4	5.922	114.37	142.897	30.047	30.11	0.219	30.047	30.539	114.805	extrapolated	109.804	119.807	30.061	extrapolated	29.692
Minneapolis	Minneapolis	Minnesota	Fraxinus pennsylvanica	Acer	44.977753	-93.2650108	400070	46	190766	106	176635	2.84617575734359	17.2217954222761	0.15968522659722	0.249131705457549	48	116601	2.32854571996245	10.2630053911437	163640	0.712545832314837	2398	1791	48	1801	6564	40475	14	16	0.860456217181488	0.533333333333333	206232	106	107.143	1.623	106.146	114.966	17.222	17.227	0.049	17.222	17.322	93.465	interpolated	91.605	95.325	17.202	interpolated	17.117
Nashville	Nashville	Tennessee	Platanus acerifolia	Quercus	36.1626638	-86.7816016	634464	25	2059	55	2032	3.27268506824231	26.3820820169002	0.138287401574803	0.157430112800392	22	816	2.54878403233589	12.7915402229027	1928	0.423236514522822	3102	2422	22	2433	329	783	6	11	0.704136690647482	0.647058823529412	106798	55	57.999	3.239	55.535	71.804	26.382	26.777	0.62	26.382	27.991	57.999	extrapolated	48.99	67.007	26.777	extrapolated	25.626
NewOrleans	New Orleans	Louisiana	Lagerstroemia indica	Lagerstroemia	29.9510658	-90.0715323	378715	51	105813	297	102815	2.9480626317997	19.0689742939987	0.294159412537081	0.291261014011267	75	48101	2.28106905146406	9.78713777276814	100745	0.477452975333763	3274	2345	75	2492	44063	8581	93	33	0.163000531874478	0.261904761904762	111898	297	346.47	17.036	322.668	392.345	19.069	19.104	0.118	19.069	19.334	237.939	interpolated	232.247	243.631	19.015	interpolated	18.779
NewYork	New York	New York	Platanus acerifolia	Acer	40.7127837	-74.0059413	8405837	1	683788	124	609023	3.29918019682902	27.0904210017016	0.142874735436921	0.136067491708438	48	180210	2.64735796443143	14.1166925284446	600038	0.300330979037994	3827	2241	48	2269	221204	198624	28	18	0.47310803471898	0.391304347826087	122057	124	124	0.007	124	124.013	27.09	27.093	0.05	27.09	27.191	122.637	interpolated	122.291	122.983	27.047	interpolated	26.961
Oakland	Oakland	California	Platanus acerifolia	Pyrus	37.8043637	-122.2711137	406253	45	38613	164	34068	3.58371129690885	36.0069255703731	0.111189385934014	0.115670381627828	12	413	1.93111255898949	6.89717949359033	23046	0.0179206803783737	7264	5571	12	5711	16966	5667	51	15	0.250386603631865	0.227272727272727	403466	164	164.031	0.188	164.001	165.296	36.007	36.095	0.267	36.007	36.618	164.029	extrapolated	160.162	167.897	36.014	extrapolated	35.511
OklahomaCity	Oklahoma City	Oklahoma	Juniperus virginiana	Quercus	35.4675602	-97.5164276	610613	27	10000	92	8784	3.53578004275546	34.3217767284056	0.0809426229508197	0.224664637583136	40	5037	2.98747059394635	19.8354470855431	8623	0.584135451698945	3019	2453	40	2465	1689	1897	10	16	0.529001673173452	0.615384615384615	177660	92	113.331	14.523	98.364	163.502	34.322	34.552	0.383	34.322	35.303	111.414	extrapolated	93.838	128.99	34.541	extrapolated	33.858
Ontario	Ontario	California	Lagerstroemia indica	Lagerstroemia	34.0633443	-117.6508876	167500	144	58577	227	58184	3.95067908850452	51.9706475234264	0.079575140932215	0.0794140852800933	21	2745	1.91104415754432	6.76014376975747	53236	0.0515628522052746	7264	5571	21	5756	37324	13167	85	24	0.260779148759185	0.220183486238532	403466	227	249.533	11.597	235.714	285.27	51.971	52.088	0.259	51.971	52.596	214.643	interpolated	208.701	220.585	51.905	interpolated	51.336
Orlando	Orlando	Florida	Quercus virginiana	Quercus	28.5383355	-81.3792365	255483	77	68211	146	64345	2.46222112229193	11.7308382513696	0.266158986712254	0.446944511605416	49	39172	1.74653648709237	5.73470601142627	62737	0.624384334603185	4433	2974	49	3022	20496	3069	47	18	0.130235518777849	0.276923076923077	138887	146	150.545	3.832	147.081	165.114	11.731	11.745	0.075	11.731	11.893	138.615	interpolated	134.841	142.388	11.72	interpolated	11.577
OverlandPark	Overland Park	Kansas	Acer rubrum	Acer	38.9822282	-94.6707917	181260	132	45148	123	43777	2.73517856028698	15.4124952498145	0.303561230783288	0.363660732235799	26	19151	2.03647432582151	7.66354235907634	41996	0.456019620916278	2302	1810	26	1881	4534	18311	26	14	0.801532063908952	0.35	211754	123	164.142	23.771	137.369	240.796	15.412	15.442	0.119	15.412	15.675	119.09	interpolated	111.431	126.749	15.408	interpolated	15.208
Phoenix	Phoenix	Arizona	Fraxinus velutina	Fraxinus	33.4483771	-112.0740373	1513367	6	214	49	196	3.50914026695239	33.4195235606955	0.0969387755102041	0.158878504672897	9	39	1.68942247791999	5.41635173897232	178	0.219101123595506	4362	3725	9	3756	95	44	19	11	0.316546762589928	0.366666666666667	294207	49	56.006	5.118	50.944	74.243	33.42	39.122	2.672	33.886	44.359	56.006	extrapolated	36.607	75.404	39.122	extrapolated	34.246
Pittsburgh	Pittsburgh	Pennsylvania	Acer platanoides	Acer	40.4406248	-79.9958864	305841	62	45703	206	37021	3.62186960201727	37.4074395099456	0.100348450879231	0.257209742491408	85	15775	2.95911243783934	19.2808512048955	36924	0.427228902610768	3567	2159	85	2195	6611	14538	31	29	0.687408388103456	0.483333333333333	115883	206	226.631	10.19	214.257	257.549	37.407	37.529	0.288	37.407	38.093	205.984	interpolated	198.296	213.672	37.407	interpolated	36.894
Plano	Plano	Texas	Ulmus crassifolia	Quercus	33.0198431	-96.6988856	274409	70	28375	78	22592	2.923936416773	18.6144175354933	0.161163243626062	0.228121148089452	40	18069	2.44737636745194	11.5579830046249	20675	0.873954050785973	5685	4682	40	4680	933	1673	10	14	0.641980046047583	0.583333333333333	676587	78	98.249	20.187	81.975	181.156	18.614	18.654	0.142	18.614	18.932	82.998	extrapolated	76.335	89.661	18.632	extrapolated	18.354
Portland	Portland	Oregon	Acer platanoides	Acer	45.5230622	-122.6764816	609456	29	218602	150	173239	3.68370749485067	39.7936556916093	0.110881498969632	0.266740180585866	10	8395	1.51493060054075	4.54910541043495	72335	0.116057233704293	4389	3282	10	3412	17415	46525	52	4	0.727635283077885	0.0714285714285714	248608	150	160.286	7.789	152.749	188.485	39.794	39.813	0.115	39.794	40.038	132.497	interpolated	130.419	134.575	39.729	interpolated	39.487
Providence	Providence	Rhode Island	Acer platanoides	Acer	41.8239891	-71.4128343	177994	134	24525	107	21621	3.14383843868265	23.1927200546696	0.141251560982378	0.246408105639067	31	6252	2.31826752424907	10.1580604592755	21052	0.296978909367281	2096	1410	31	1455	7168	7632	25	17	0.515675675675676	0.404761904761905	2678	107	108.786	2.189	107.273	118.671	23.193	23.252	0.196	23.193	23.637	108.542	extrapolated	104.043	113.041	23.224	extrapolated	22.778
RanchoCucamonga	Rancho Cucamonga	California	Lagerstroemia indica	Lagerstroemia	34.1063989	-117.5931084	171386	141	82947	187	75914	3.39887999534367	29.9305589024467	0.169784229522881	0.160541031996114	10	1100	1.3864243090138	4.00051982535001	68698	0.0160121109784855	7264	5571	10	5738	53077	14521	73	16	0.214814047752892	0.179775280898876	403466	187	217.153	15.165	198.889	263.479	29.931	29.976	0.151	29.931	30.271	167.297	interpolated	162.422	172.172	29.887	interpolated	29.581
Richmond	Richmond	Virginia	Acer saccharum	Acer	37.5407246	-77.4360481	214114	99	3272	78	1794	3.30261841462851	27.1837240756162	0.126532887402453	0.262809917355372	46	1145	2.69353496620899	14.7838440489845	1765	0.648725212464589	3625	2598	46	2584	426	194	7	11	0.312903225806452	0.611111111111111	102279	78	95.99	11.219	83.85	133.324	27.184	27.975	0.825	27.184	29.592	95.99	extrapolated	69.11	122.87	27.975	extrapolated	26.298
Rochester	Rochester	New York	Gleditsia triacanthos	Acer	43.16103	-77.6109219	210358	103	64056	163	42274	3.64623670791422	38.3301467475199	0.14919335761934	0.16735308445153	60	16463	2.91844026250044	18.512390460131	40537	0.406122801391322	3827	2241	60	2284	11111	12963	26	27	0.538464733737642	0.509433962264151	122057	163	166.571	3.096	163.823	178.49	38.33	38.408	0.26	38.33	38.919	161.52	interpolated	156.968	166.071	38.319	interpolated	37.81
Sacramento	Sacramento	California	Platanus acerifolia	Platanus	38.5815719	-121.4943996	479686	35	87191	99	79859	3.52387496572472	33.91559593678	0.176698931867416	0.167469736529789	12	12617	1.80440944066221	6.07638192462564	75964	0.166091832973514	7264	5571	12	5646	32717	30630	35	16	0.483527238858983	0.313725490196078	403466	99	99	0.138	99	99.289	33.916	33.936	0.152	33.916	34.234	98.899	interpolated	98.556	99.242	33.891	interpolated	33.663
SanDiego	San Diego	California	Syagrus romanzoffianum	Syagrus	32.715738	-117.1610838	1355896	8	212304	121	173045	3.56370995152387	35.2938931900293	0.130740558814181	0.107167387463348	9	12720	1.1894383775478	3.28523562708303	129477	0.0982413865010774	7264	5571	9	5674	86557	30200	56	11	0.258656868538931	0.164179104477612	403466	121	122	1.871	121.09	132.064	35.294	35.306	0.1	35.294	35.502	116.278	interpolated	115.262	117.293	35.248	interpolated	35.015
SanFrancisco	San Francisco	California	Platanus acerifolia	Prunus	37.7749295	-122.4194155	837442	14	188462	404	166434	4.14688510702083	63.2367175927233	0.0716500234327121	0.0864126305928587	43	4282	1.8878813583813	6.60535945656913	151232	0.0283141134151502	7264	5571	43	5889	107123	39827	116	33	0.271024157876829	0.221476510067114	403466	404	439.852	14.153	421.005	479.586	63.237	63.324	0.214	63.237	63.744	325.376	interpolated	320.87	329.882	62.954	interpolated	62.404
SanJose	San Jose	California	Platanus acerifolia	Platanus	37.3382082	-121.8863286	998537	10	347669	424	257914	3.99591674996174	54.3756666716505	0.101937079801794	0.102787009063444	41	17040	2.18387284821912	8.88063308855616	245909	0.069293925801821	7264	5571	41	5913	135840	93029	121	37	0.406472698355828	0.234177215189873	403466	424	499.674	26.7	462.67	572.084	54.376	54.431	0.166	54.376	54.757	310.309	interpolated	305.737	314.881	54.111	interpolated	53.782
SantaRosa	Santa Rosa	California	Quercus	Quercus	38.440429	-122.7140548	171990	140	3016	16	1213	1.87194296422098	6.50091518199752	0.385820280296785	0.385820280296785	1	203	0	1	308	0.659090909090909	7264	5571	1	5585	1	104	1	2	0.990476190476191	0.666666666666667	403466	16	17.998	3.739	16.181	38.112	6.501	6.549	0.198	6.501	6.937	17.998	extrapolated	13.537	22.46	6.549	extrapolated	6.162
Seattle	Seattle	Washington	Prunus cerasifera	Acer	47.6062095	-122.3320708	652405	21	165623	399	145851	4.5358337285876	93.3012708231648	0.0565234383034741	0.215671274793727	44	9887	2.66921833397226	14.4286863697175	130869	0.0755488312740221	3597	2529	44	2840	42788	78194	87	32	0.646327552859103	0.26890756302521	172119	399	417	9.605	405.748	447.01	93.301	93.439	0.337	93.301	94.1	351.986	interpolated	347.9	356.071	92.905	interpolated	92.366
SiouxFalls	Sioux Falls	South Dakota	Fraxinus pennsylvanica	Fraxinus	43.5445959	-96.7311034	164676	147	63024	139	58391	2.6667359306955	14.3929129717648	0.367385384733949	0.359689795918367	24	35900	1.58808891427395	4.89438639289901	57736	0.621795760011085	1888	1542	24	1633	1239	20597	27	21	0.943258838615131	0.4375	196350	139	151.8	8.375	142.973	180.242	14.393	14.413	0.107	14.393	14.622	131.24	interpolated	126.609	135.872	14.382	interpolated	14.19
StLouis	St. Louis	Missouri	Acer rubrum	Acer	38.6270025	-90.1994042	318416	58	83594	204	78403	3.38677615732301	29.5704679033734	0.109370814892287	0.234901500263625	82	52925	2.77676090100451	16.0668943107109	78040	0.67817785750897	3026	2084	82	2124	11281	13834	33	29	0.550826199482381	0.467741935483871	178040	204	219.158	8.096	209.678	244.463	29.57	29.614	0.135	29.57	29.879	182.745	interpolated	178.011	187.479	29.522	interpolated	29.265
Stockton	Stockton	California	Pistacia chinensis	Pistacia	37.9577016	-121.2907796	298118	64	98300	252	95838	3.65836169890506	38.7977284148009	0.118867255159749	0.116649437581241	29	11656	1.53598508270045	4.64589987212343	88941	0.131053170079041	7264	5571	29	5765	48093	29192	78	30	0.377718832891247	0.277777777777778	403466	252	280	14	263.093	322.672	38.798	38.857	0.181	38.798	39.212	222.777	interpolated	218.068	227.485	38.709	interpolated	38.386
Tampa	Tampa	Florida	Quercus virginiana	Quercus	27.950575	-82.4571776	352957	53	25501	178	25008	2.99182727416071	19.9220523040392	0.227207293666027	0.44634165802282	71	17514	2.30052328474103	9.97940315813564	24134	0.725698185133007	4433	2974	71	3010	6027	593	60	13	0.0895770392749245	0.178082191780822	138887	178	201.36	11.355	187.472	235.611	19.922	20.008	0.22	19.922	20.439	188.479	extrapolated	179.566	197.393	19.955	extrapolated	19.584
WashingtonDC	Washington (DC)	District of Columbia	Acer rubrum	Quercus	38.9071923	-77.0368707	646449	23	190991	138	153350	3.90708073085775	49.7534959186669	0.0828888164329964	0.23671319305973	47	81465	2.94725420262696	19.053564608544	145290	0.560706173859178	1884	1310	47	1354	28221	35604	32	14	0.557837837837838	0.304347826086957	158	138	138.4	0.867	138.03	143.309	49.753	49.776	0.148	49.753	50.067	131.747	interpolated	130.371	133.124	49.682	interpolated	49.411
Worcester	Worcester	Massachusetts	Acer platanoides	Acer	42.2625932	-71.8022934	182544	129	17454	87	15124	1.7678886709386	5.85847113414328	0.619148373446178	0.788977191962267	40	4214	2.18912808542863	8.92742576762975	14984	0.281233315536572	3243	1793	40	1800	688	10082	14	15	0.936118848653668	0.517241379310345	20202	87	105.061	11.644	92.687	144.358	5.858	5.88	0.093	5.858	6.063	100.432	extrapolated	87.216	113.648	5.875	extrapolated	5.732
[truncated: 50 more columns]
