# Supplementary material for: Species clustering, climate effects, and introduced species in 5 million city trees across 63 US cities
Source: eLife. 2022 Sep 27;11:e77891. doi: 10.7554/eLife.77891 (PMC9578703; doi:10.7554/eLife.77891)
Supplement: Figure 3—source data 1. — This file includes all statistics on clustering by species, including number of clusters, median effective species count per cluster, min, max, interquartile range, and 95% confidence interval (see Figure 2). [file elife-77891-fig3-data1.csv]

filename_city	median	mean	max	min	IQR_1	IQR_2	CI_lower	CI_upper	number_clusters
RanchoCucamonga	0.216576386	0.255353949	0.982373491	0.039127339	0.137425991	0.324750925	0.202812481	0.230340292	526
LasVegas	0.252001235	0.280719596	1.057543569	0.049540122	0.161191147	0.366519521	0.229661233	0.274341238	188
Atlanta	0.267262844	0.285894729	0.809228281	0.044303382	0.176472274	0.382331463	0.253355499	0.28117019	433
Nashville	0.270901936	0.300496182	0.520455757	0.146359689	0.209497825	0.364401134	0.219723435	0.322080437	22
Ontario	0.275574784	0.290481227	0.931774278	0.033502938	0.162058915	0.388372805	0.261331703	0.289817865	490
Arlington	0.294579849	0.300390035	0.578670954	0.101326067	0.212380723	0.37142308	0.273396206	0.315763492	125
SanDiego	0.29621656	0.321451331	0.976854344	0.032903081	0.171214656	0.439910649	0.286607982	0.305825139	1452
Seattle	0.314506213	0.329031374	0.824110984	0.024033994	0.21576297	0.438185126	0.305471919	0.323540506	1154
Stockton	0.317199429	0.350667811	1.086591958	0.032239219	0.200531672	0.471312951	0.302229312	0.332169545	656
CapeCoral	0.324764638	0.361091597	1.023569651	0.061833453	0.209516641	0.48476328	0.299908455	0.349620821	251
GardenGrove	0.356456943	0.376514232	1.091248685	0.077720406	0.217517451	0.499125762	0.315858466	0.397055421	98
HuntingtonBeach	0.366184048	0.379965247	0.960457349	0.045948845	0.261717008	0.492303236	0.34472178	0.387646317	250
Knoxville	0.366962706	0.377875336	0.80258483	0.055291711	0.230569066	0.506493242	0.32323604	0.410689371	70
OverlandPark	0.369286011	0.442309747	2.812965012	0.075046066	0.207634481	0.60356484	0.343935337	0.394636686	542
Detroit	0.380523456	0.388948358	1.006884735	0.041289306	0.273007356	0.511715039	0.351002792	0.41004412	135
Columbus	0.387151974	0.407593959	2.458553764	0.042777284	0.278302558	0.513215566	0.374860268	0.39944368	960
Tampa	0.387668673	0.438142454	1.760734049	0.087447276	0.242760559	0.558399371	0.348364499	0.426972848	173
Durham	0.389792521	0.445473945	1.007073999	0.067890638	0.261068792	0.599452823	0.340494907	0.439090135	86
SanJose	0.392284667	0.418731923	1.378388915	0.047663513	0.249529698	0.557423988	0.382401018	0.402168316	1915
Minneapolis	0.393761998	0.421704356	1.484054124	0.082832591	0.304523687	0.509199774	0.386182167	0.401341829	1860
AuroraCO	0.407075562	0.43405014	1.671381926	0.074257119	0.29218026	0.540031488	0.384795171	0.429355954	353
OklahomaCity	0.418222324	0.413022062	0.883962075	0.059551021	0.292704608	0.537843199	0.378977956	0.457466691	79
Baltimore	0.418344335	0.426864828	1.669110602	0.033950218	0.307471092	0.531381314	0.405879137	0.430809534	780
Louisville	0.419089511	0.433106263	0.953109003	0.089196048	0.331625795	0.553896342	0.394713396	0.443465626	183
DesMoines	0.426664961	0.436489723	0.83123622	0.05777694	0.318273018	0.553528905	0.392951651	0.460378271	92
StLouis	0.433601982	0.451085012	1.114059248	0.06322309	0.300977293	0.582428658	0.416843777	0.450360187	537
Pittsburgh	0.440794521	0.455716676	1.116130777	0.065245825	0.320305321	0.571473488	0.418507082	0.463081959	299
Honolulu	0.443451161	0.472078129	1.235583613	0.040216516	0.277983736	0.629222702	0.396676084	0.490226238	120
Sacramento	0.447091935	0.456360685	1.218049231	0.038060452	0.282200786	0.619115087	0.432255437	0.461928432	874
Milwaukee	0.459370819	0.473457626	1.48616612	0.056220182	0.355286098	0.584839883	0.437691689	0.481049949	268
Austin	0.473826977	0.557540373	1.21269747	0.138997271	0.383292879	0.730242675	0.409361842	0.538292111	57
SiouxFalls	0.494672357	0.606646348	3.285406065	0.120752755	0.375043175	0.749840001	0.458279337	0.531065376	361
Albuquerque	0.511489472	0.523211361	1.011471291	0.095023883	0.343629463	0.682818997	0.425189614	0.59778933	33
Buffalo	0.544124001	0.718789822	2.689495566	0.108399376	0.337779803	1.022638651	0.508283157	0.579964844	735
Anaheim	0.545113042	0.54779071	1.117527121	0.07538054	0.407795179	0.681155366	0.523616604	0.566609479	360
Portland	0.551624202	0.536917868	1.244451249	0.037274581	0.363407791	0.699914569	0.539502514	0.563745891	1412
NewYork	0.558408099	0.560500899	1.398833749	0.051773452	0.397639111	0.717423206	0.550100929	0.566715269	2982
Greensboro	0.560807582	0.872339679	3.891571081	0.184024623	0.515638533	0.633371878	-0.205570023	1.327185187	10
ColoradoSprings	0.575478075	0.58434925	3.68116983	0.072818917	0.113099523	0.877050279	0.510188992	0.640767158	206
Rochester	0.589448318	0.606592922	1.303402081	0.056945077	0.431896521	0.731322441	0.564004516	0.61489212	298
Madison	0.621114735	0.643711362	1.571972546	0.148578381	0.437399974	0.819797172	0.588760325	0.653469145	279
WashingtonDC	0.625621044	0.605468418	1.181280942	0.041565751	0.481120843	0.743724938	0.613995111	0.637246977	1131
Houston	0.71501947	0.717060538	1.737211001	0.062134096	0.529956612	0.901601963	0.704788782	0.725250158	2636
SantaRosa	0.718237697	0.744064825	1.200431708	0.321975172	0.59835288	0.895542665	0.593020785	0.843454608	20
Denver	0.866752259	0.840867963	1.417991992	0.073237808	0.742430869	0.985674371	0.856818208	0.876686311	1792
Oakland	0.880645865	0.890014309	1.376785609	0.521495408	0.787018754	0.99842362	0.860035086	0.901256644	220
LosAngeles	0.88209252	0.925017055	2.172561053	0.126538163	0.494863411	1.323384379	0.870440858	0.893744183	6128
Providence	0.927626736	0.921931844	1.466294073	0.557778965	0.815238524	1.001568254	0.903941997	0.951311474	165
SanFrancisco	0.996933892	1.00392746	1.445458765	0.660289267	0.927968696	1.079545029	0.991283107	1.002584677	1564
