# Supplementary material for: Species clustering, climate effects, and introduced species in 5 million city trees across 63 US cities
Source: eLife. 2022 Sep 27;11:e77891. doi: 10.7554/eLife.77891 (PMC9578703; doi:10.7554/eLife.77891)
Supplement: Figure 4—source data 1. — This csv file includes a list of all naturally occurring (i.e., “native”) taxa observed in each US state, from the Biota of North America Project. [file elife-77891-fig4-data1.csv]

state	code	scientific_name_original	scientific_name
Alaska	AK	Abies amabilis	Abies amabilis
Alaska	AK	Abies lasiocarpa	Abies lasiocarpa
Alaska	AK	Acer glabrum var. douglasii	Acer glabrum
Alaska	AK	Achillea alpina ssp. multiflora	Achillea alpina
Alaska	AK	Achillea millefolium	Achillea millefolium
Alaska	AK	Aconitum delphiniifolium ssp. chamissonianum	Aconitum delphiniifolium
Alaska	AK	Aconitum delphiniifolium ssp. delphiniifolium	Aconitum delphiniifolium
Alaska	AK	Aconitum delphiniifolium ssp. paradoxum	Aconitum delphiniifolium
Alaska	AK	Aconitum maximum	Aconitum maximum
Alaska	AK	Acorus americanus	Acorus americanus
Alaska	AK	Actaea rubra ssp. arguta	Actaea rubra
Alaska	AK	Actaea rubra ssp. rubra	Actaea rubra
Alaska	AK	Adiantum aleuticum var. aleuticum	Adiantum aleuticum
Alaska	AK	Adoxa moschatellina	Adoxa moschatellina
Alaska	AK	Agoseris aurantiaca var. aurantiaca	Agoseris aurantiaca
Alaska	AK	Agoseris glauca var. dasycephala	Agoseris glauca
Alaska	AK	Agrostis clavata	Agrostis clavata
Alaska	AK	Agrostis exarata	Agrostis exarata
Alaska	AK	Agrostis idahoensis	Agrostis idahoensis
Alaska	AK	Agrostis mertensii	Agrostis mertensii
Alaska	AK	Agrostis scabra	Agrostis scabra
Alaska	AK	Agrostis vinealis	Agrostis vinealis
Alaska	AK	Alisma triviale	Alisma triviale
Alaska	AK	Allium schoenoprasum	Allium schoenoprasum
Alaska	AK	Allium victorialis	Allium victorialis
Alaska	AK	Alnus alnobetula ssp. fruticosa	Alnus alnobetula
Alaska	AK	Alnus alnobetula ssp. sinuata	Alnus alnobetula
Alaska	AK	Alnus incana ssp. tenuifolia	Alnus incana
Alaska	AK	Alnus rubra	Alnus rubra
Alaska	AK	Alopecurus aequalis var. aequalis	Alopecurus aequalis
Alaska	AK	Alopecurus magellanicus	Alopecurus magellanicus
Alaska	AK	Alyssum obovatum	Alyssum obovatum
Alaska	AK	Ambrosia chamissonis	Ambrosia chamissonis
Alaska	AK	Amelanchier alnifolia var. alnifolia	Amelanchier alnifolia
Alaska	AK	Amelanchier alnifolia var. semiintegrifolia	Amelanchier alnifolia
Alaska	AK	Amsinckia menziesii	Amsinckia menziesii
Alaska	AK	Anaphalis margaritacea	Anaphalis margaritacea
Alaska	AK	Andromeda polifolia var. polifolia	Andromeda polifolia
Alaska	AK	Androsace alaskana	Androsace alaskana
Alaska	AK	Androsace americana	Androsace americana
Alaska	AK	Androsace beringensis	Androsace beringensis
Alaska	AK	Androsace chamaejasme	Androsace chamaejasme
Alaska	AK	Androsace constancei	Androsace constancei
Alaska	AK	Androsace ochotensis	Androsace ochotensis
Alaska	AK	Androsace septentrionalis	Androsace septentrionalis
Alaska	AK	Anemonastrum richardsonii	Anemonastrum richardsonii
Alaska	AK	Anemonastrum sibiricum	Anemonastrum sibiricum
Alaska	AK	Anemonastrum villosissimum	Anemonastrum villosissimum
Alaska	AK	Anemone drummondii ssp. heimburgeri	Anemone drummondii
Alaska	AK	Anemone lithophila	Anemone lithophila
Alaska	AK	Anemone multiceps	Anemone multiceps
Alaska	AK	Anemone multifida var. multifida	Anemone multifida
Alaska	AK	Anemone parviflora	Anemone parviflora
Alaska	AK	Angelica genuflexa	Angelica genuflexa
Alaska	AK	Angelica lucida	Angelica lucida
Alaska	AK	Antennaria alpina	Antennaria alpina
Alaska	AK	Antennaria borealis	Antennaria borealis
Alaska	AK	Antennaria densifolia	Antennaria densifolia
Alaska	AK	Antennaria dioica	Antennaria dioica
Alaska	AK	Antennaria friesiana ssp. alaskana	Antennaria friesiana
Alaska	AK	Antennaria friesiana ssp. friesiana	Antennaria friesiana
Alaska	AK	Antennaria friesiana ssp. neoalaskana	Antennaria friesiana
Alaska	AK	Antennaria microphylla	Antennaria microphylla
Alaska	AK	Antennaria monocephala ssp. angustata	Antennaria monocephala
Alaska	AK	Antennaria monocephala ssp. monocephala	Antennaria monocephala
Alaska	AK	Antennaria pulcherrima ssp. pulcherrima	Antennaria pulcherrima
Alaska	AK	Antennaria pulvinata	Antennaria pulvinata
Alaska	AK	Antennaria rosea ssp. arida	Antennaria rosea
Alaska	AK	Antennaria rosea ssp. confinis	Antennaria rosea
Alaska	AK	Antennaria rosea ssp. rosea	Antennaria rosea
Alaska	AK	Anthoxanthum arcticum	Anthoxanthum arcticum
Alaska	AK	Anthoxanthum hirtum	Anthoxanthum hirtum
Alaska	AK	Anthoxanthum monticola ssp. alpinum	Anthoxanthum monticola
Alaska	AK	Anticlea elegans ssp. elegans	Anticlea elegans
Alaska	AK	Aphragmus eschscholtzianus	Aphragmus eschscholtzianus
Alaska	AK	Aphyllon fasciculatum	Aphyllon fasciculatum
Alaska	AK	Aphyllon uniflorum	Aphyllon uniflorum
Alaska	AK	Apocynum androsaemifolium	Apocynum androsaemifolium
Alaska	AK	Aquilegia brevistyla	Aquilegia brevistyla
Alaska	AK	Aquilegia formosa	Aquilegia formosa
Alaska	AK	Arabidopsis kamchatica	Arabidopsis kamchatica
Alaska	AK	Arabidopsis lyrata	Arabidopsis lyrata
Alaska	AK	Arabidopsis petraea	Arabidopsis petraea
Alaska	AK	Arabis eschscholtziana	Arabis eschscholtziana
Alaska	AK	Arabis pycnocarpa	Arabis pycnocarpa
Alaska	AK	Arceuthobium tsugense ssp. tsugense	Arceuthobium tsugense
Alaska	AK	Arctagrostis latifolia ssp. arundinacea	Arctagrostis latifolia
Alaska	AK	Arctagrostis latifolia ssp. latifolia	Arctagrostis latifolia
Alaska	AK	Arctanthemum arcticum ssp. arcticum	Arctanthemum arcticum
Alaska	AK	Arctanthemum arcticum ssp. polare	Arctanthemum arcticum
Alaska	AK	Arcteranthis cooleyae	Arcteranthis cooleyae
Alaska	AK	Arctophila fulva	Arctophila fulva
Alaska	AK	Arctopoa eminens	Arctopoa eminens
Alaska	AK	Arctostaphylos uva-ursi	Arctostaphylos uva-ursi
Alaska	AK	Arctous alpina	Arctous alpina
Alaska	AK	Arctous rubra	Arctous rubra
Alaska	AK	Arenaria longipedunculata	Arenaria longipedunculata
Alaska	AK	Armeria maritima ssp. sibirica	Armeria maritima
Alaska	AK	Arnica angustifolia ssp. angustifolia	Arnica angustifolia
Alaska	AK	Arnica angustifolia ssp. tomentosa	Arnica angustifolia
Alaska	AK	Arnica chamissonis	Arnica chamissonis
Alaska	AK	Arnica cordifolia	Arnica cordifolia
Alaska	AK	Arnica griscomii ssp. frigida	Arnica griscomii
Alaska	AK	Arnica lanceolata ssp. prima	Arnica lanceolata
Alaska	AK	Arnica latifolia	Arnica latifolia
Alaska	AK	Arnica lessingii	Arnica lessingii
Alaska	AK	Arnica lonchophylla ssp. lonchophylla	Arnica lonchophylla
Alaska	AK	Arnica mollis	Arnica mollis
Alaska	AK	Arnica ovata	Arnica ovata
Alaska	AK	Arnica unalaschcensis	Arnica unalaschcensis
Alaska	AK	Artemisia aleutica	Artemisia aleutica
Alaska	AK	Artemisia borealis ssp. borealis	Artemisia borealis
Alaska	AK	Artemisia borealis ssp. richardsoniana	Artemisia borealis
Alaska	AK	Artemisia campestris ssp. pacifica	Artemisia campestris
Alaska	AK	Artemisia dracunculus	Artemisia dracunculus
Alaska	AK	Artemisia frigida	Artemisia frigida
Alaska	AK	Artemisia furcata	Artemisia furcata
Alaska	AK	Artemisia globularia ssp. globularia	Artemisia globularia
Alaska	AK	Artemisia globularia ssp. lutea	Artemisia globularia
Alaska	AK	Artemisia glomerata	Artemisia glomerata
Alaska	AK	Artemisia kruhsiana ssp. alaskana	Artemisia kruhsiana
Alaska	AK	Artemisia laciniata	Artemisia laciniata
Alaska	AK	Artemisia michauxiana	Artemisia michauxiana
Alaska	AK	Artemisia norvegica ssp. saxatilis	Artemisia norvegica
Alaska	AK	Artemisia senjavinensis	Artemisia senjavinensis
Alaska	AK	Artemisia stelleriana	Artemisia stelleriana
Alaska	AK	Artemisia tanacetifolia	Artemisia tanacetifolia
Alaska	AK	Artemisia tilesii	Artemisia tilesii
Alaska	AK	Aruncus dioicus var. acuminatus	Aruncus dioicus
Alaska	AK	Askellia elegans	Askellia elegans
Alaska	AK	Askellia pygmaea ssp. ramosa	Askellia pygmaea
Alaska	AK	Asplenium trichomanes ssp. quadrivalens	Asplenium trichomanes
Alaska	AK	Asplenium viride	Asplenium viride
Alaska	AK	Aster alpinus var. vierhapperi	Aster alpinus
Alaska	AK	Astragalus agrestis	Astragalus agrestis
Alaska	AK	Astragalus alpinus var. alpinus	Astragalus alpinus
Alaska	AK	Astragalus americanus	Astragalus americanus
Alaska	AK	Astragalus australis	Astragalus australis
Alaska	AK	Astragalus bodinii	Astragalus bodinii
Alaska	AK	Astragalus eucosmus	Astragalus eucosmus
Alaska	AK	Astragalus laxmannii var. tananaicus	Astragalus laxmannii
Alaska	AK	Astragalus nutzotinensis	Astragalus nutzotinensis
Alaska	AK	Astragalus polaris	Astragalus polaris
Alaska	AK	Astragalus robbinsii var. harringtonii	Astragalus robbinsii
Alaska	AK	Astragalus robbinsii var. minor	Astragalus robbinsii
Alaska	AK	Astragalus robbinsii var. morganiae	Astragalus robbinsii
Alaska	AK	Astragalus umbellatus	Astragalus umbellatus
Alaska	AK	Astragalus williamsii	Astragalus williamsii
Alaska	AK	Athyrium americanum	Athyrium americanum
Alaska	AK	Athyrium cyclosorum	Athyrium cyclosorum
Alaska	AK	Atriplex gmelinii var. alaskensis	Atriplex gmelinii
Alaska	AK	Atriplex gmelinii var. gmelinii	Atriplex gmelinii
Alaska	AK	Azolla filiculoides	Azolla filiculoides
Alaska	AK	Barbarea orthoceras	Barbarea orthoceras
Alaska	AK	Beckmannia syzigachne	Beckmannia syzigachne
Alaska	AK	Beckwithia glacialis ssp. alaskensis	Beckwithia glacialis
Alaska	AK	Beckwithia glacialis ssp. camissonis	Beckwithia glacialis
Alaska	AK	Betula glandulosa	Betula glandulosa
Alaska	AK	Betula kenaica	Betula kenaica
Alaska	AK	Betula occidentalis	Betula occidentalis
Alaska	AK	Betula papyrifera	Betula papyrifera
Alaska	AK	Betula pendula ssp. mandshurica	Betula pendula
Alaska	AK	Betula pumila	Betula pumila
Alaska	AK	Betula X dugleana	Betula dugleana
Alaska	AK	Betula X eastwoodiae	Betula eastwoodiae
Alaska	AK	Betula X hornei	Betula hornei
Alaska	AK	Betula X sargentii	Betula sargentii
Alaska	AK	Betula X uliginosa	Betula uliginosa
Alaska	AK	Betula X winteri	Betula winteri
Alaska	AK	Bistorta plumosa	Bistorta plumosa
Alaska	AK	Bistorta vivipara	Bistorta vivipara
Alaska	AK	Blysmopsis rufa	Blysmopsis rufa
Alaska	AK	Boechera calderi	Boechera calderi
Alaska	AK	Boechera grahamii	Boechera grahamii
Alaska	AK	Boechera lemmonii	Boechera lemmonii
Alaska	AK	Boechera retrofracta	Boechera retrofracta
Alaska	AK	Boechera stricta	Boechera stricta
Alaska	AK	Boschniakia rossica	Boschniakia rossica
Alaska	AK	Botrychium alaskense	Botrychium alaskense
Alaska	AK	Botrychium ascendens	Botrychium ascendens
Alaska	AK	Botrychium campestre var. lineare	Botrychium campestre
Alaska	AK	Botrychium hesperium	Botrychium hesperium
Alaska	AK	Botrychium lanceolatum	Botrychium lanceolatum
Alaska	AK	Botrychium lunaria var. lunaria	Botrychium lunaria
Alaska	AK	Botrychium minganense	Botrychium minganense
Alaska	AK	Botrychium montanum	Botrychium montanum
Alaska	AK	Botrychium neolunaria	Botrychium neolunaria
Alaska	AK	Botrychium pedunculosum	Botrychium pedunculosum
Alaska	AK	Botrychium pinnatum	Botrychium pinnatum
Alaska	AK	Botrychium simplex	Botrychium simplex
Alaska	AK	Botrychium spathulatum	Botrychium spathulatum
Alaska	AK	Botrychium tunux	Botrychium tunux
Alaska	AK	Botrychium yaaxudakeit	Botrychium yaaxudakeit
Alaska	AK	Botrypus virginianus	Botrypus virginianus
Alaska	AK	Boykinia richardsonii	Boykinia richardsonii
Alaska	AK	Brasenia schreberi	Brasenia schreberi
Alaska	AK	Braya glabella ssp. glabella	Braya glabella
Alaska	AK	Braya glabella ssp. purpurascens	Braya glabella
Alaska	AK	Braya humilis ssp. humilis	Braya humilis
Alaska	AK	Bromus ciliatus	Bromus ciliatus
Alaska	AK	Bromus pacificus	Bromus pacificus
Alaska	AK	Bromus pumpellianus ssp. dicksonii	Bromus pumpellianus
Alaska	AK	Bromus pumpellianus ssp. pumpellianus	Bromus pumpellianus
Alaska	AK	Bromus richardsonii	Bromus richardsonii
Alaska	AK	Bromus sitchensis var. aleutensis	Bromus sitchensis
Alaska	AK	Bromus sitchensis var. marginatus	Bromus sitchensis
Alaska	AK	Bromus sitchensis var. sitchensis	Bromus sitchensis
Alaska	AK	Bupleurum americanum	Bupleurum americanum
Alaska	AK	Calamagrostis canadensis var. canadensis	Calamagrostis canadensis
Alaska	AK	Calamagrostis canadensis var. langsdorffii	Calamagrostis canadensis
Alaska	AK	Calamagrostis deschampsioides	Calamagrostis deschampsioides
Alaska	AK	Calamagrostis lapponica	Calamagrostis lapponica
Alaska	AK	Calamagrostis nutkaensis	Calamagrostis nutkaensis
Alaska	AK	Calamagrostis purpurascens	Calamagrostis purpurascens
Alaska	AK	Calamagrostis sesquiflora	Calamagrostis sesquiflora
Alaska	AK	Calamagrostis stricta ssp. groenlandica	Calamagrostis stricta
Alaska	AK	Calamagrostis stricta ssp. inexpansa	Calamagrostis stricta
Alaska	AK	Calamagrostis stricta ssp. stricta	Calamagrostis stricta
Alaska	AK	Calla palustris	Calla palustris
Alaska	AK	Callitriche hermaphroditica	Callitriche hermaphroditica
Alaska	AK	Callitriche heterophylla ssp. bolanderi	Callitriche heterophylla
Alaska	AK	Callitriche heterophylla ssp. heterophylla	Callitriche heterophylla
Alaska	AK	Callitriche palustris	Callitriche palustris
Alaska	AK	Callitriche stenoptera	Callitriche stenoptera
Alaska	AK	Caltha biflora	Caltha biflora
Alaska	AK	Caltha leptosepala	Caltha leptosepala
Alaska	AK	Caltha natans	Caltha natans
Alaska	AK	Caltha palustris var. palustris	Caltha palustris
Alaska	AK	Caltha palustris var. radicans	Caltha palustris
Alaska	AK	Calypso bulbosa var. americana	Calypso bulbosa
Alaska	AK	Calypso bulbosa var. occidentalis	Calypso bulbosa
Alaska	AK	Campanula aurita	Campanula aurita
Alaska	AK	Campanula chamissonis	Campanula chamissonis
Alaska	AK	Campanula lasiocarpa	Campanula lasiocarpa
Alaska	AK	Campanula rotundifolia	Campanula rotundifolia
Alaska	AK	Campanula scouleri	Campanula scouleri
Alaska	AK	Campanula uniflora	Campanula uniflora
Alaska	AK	Canadanthus modestus	Canadanthus modestus
Alaska	AK	Capnoides sempervirens	Capnoides sempervirens
Alaska	AK	Cardamine angulata	Cardamine angulata
Alaska	AK	Cardamine bellidifolia	Cardamine bellidifolia
Alaska	AK	Cardamine blaisdellii	Cardamine blaisdellii
Alaska	AK	Cardamine digitata	Cardamine digitata
Alaska	AK	Cardamine microphylla	Cardamine microphylla
Alaska	AK	Cardamine occidentalis	Cardamine occidentalis
Alaska	AK	Cardamine pensylvanica	Cardamine pensylvanica
Alaska	AK	Cardamine polemonioides	Cardamine polemonioides
Alaska	AK	Cardamine purpurea	Cardamine purpurea
Alaska	AK	Cardamine umbellata	Cardamine umbellata
Alaska	AK	Carex adelostoma	Carex adelostoma
Alaska	AK	Carex albonigra	Carex albonigra
Alaska	AK	Carex anthoxanthea	Carex anthoxanthea
Alaska	AK	Carex aquatilis var. aquatilis	Carex aquatilis
Alaska	AK	Carex aquatilis var. dives	Carex aquatilis
Alaska	AK	Carex aquatilis var. minor	Carex aquatilis
Alaska	AK	Carex arcta	Carex arcta
Alaska	AK	Carex arctiformis	Carex arctiformis
Alaska	AK	Carex atherodes	Carex atherodes
Alaska	AK	Carex athrostachya	Carex athrostachya
Alaska	AK	Carex atratiformis	Carex atratiformis
Alaska	AK	Carex atrofusca var. atrofusca	Carex atrofusca
Alaska	AK	Carex atrofusca var. major	Carex atrofusca
Alaska	AK	Carex atrosquama	Carex atrosquama
Alaska	AK	Carex aurea	Carex aurea
Alaska	AK	Carex bebbii	Carex bebbii
Alaska	AK	Carex bicolor	Carex bicolor
Alaska	AK	Carex bigelowii ssp. lugens	Carex bigelowii
Alaska	AK	Carex bonanzensis	Carex bonanzensis
Alaska	AK	Carex borealipolaris	Carex borealipolaris
Alaska	AK	Carex brunnescens ssp. brunnescens	Carex brunnescens
Alaska	AK	Carex buxbaumii	Carex buxbaumii
Alaska	AK	Carex canescens ssp. canescens	Carex canescens
Alaska	AK	Carex capillaris ssp. capillaris	Carex capillaris
Alaska	AK	Carex capitata	Carex capitata
Alaska	AK	Carex chordorrhiza	Carex chordorrhiza
Alaska	AK	Carex circinata	Carex circinata
Alaska	AK	Carex concinna	Carex concinna
Alaska	AK	Carex crawfordii	Carex crawfordii
Alaska	AK	Carex deflexa var. deflexa	Carex deflexa
Alaska	AK	Carex deweyana var. deweyana	Carex deweyana
Alaska	AK	Carex diandra	Carex diandra
Alaska	AK	Carex disperma	Carex disperma
Alaska	AK	Carex duriuscula	Carex duriuscula
Alaska	AK	Carex eburnea	Carex eburnea
Alaska	AK	Carex echinata ssp. echinata	Carex echinata
Alaska	AK	Carex echinata ssp. phyllomanica	Carex echinata
Alaska	AK	Carex eleusinoides	Carex eleusinoides
Alaska	AK	Carex filifolia	Carex filifolia
Alaska	AK	Carex flava	Carex flava
Alaska	AK	Carex foenea	Carex foenea
Alaska	AK	Carex fuliginosa	Carex fuliginosa
Alaska	AK	Carex garberi	Carex garberi
Alaska	AK	Carex glacialis	Carex glacialis
Alaska	AK	Carex glareosa ssp. glareosa	Carex glareosa
Alaska	AK	Carex glareosa ssp. pribylovensis	Carex glareosa
Alaska	AK	Carex gmelinii	Carex gmelinii
Alaska	AK	Carex gynocrates	Carex gynocrates
Alaska	AK	Carex heleonastes ssp. heleonastes	Carex heleonastes
Alaska	AK	Carex heleonastes ssp. neurochlaena	Carex heleonastes
Alaska	AK	Carex holostoma	Carex holostoma
Alaska	AK	Carex hoodii	Carex hoodii
Alaska	AK	Carex incurviformis var. incurviformis	Carex incurviformis
Alaska	AK	Carex interior	Carex interior
Alaska	AK	Carex kelloggii	Carex kelloggii
Alaska	AK	Carex krausei	Carex krausei
Alaska	AK	Carex lachenalii	Carex lachenalii
Alaska	AK	Carex laeviculmis	Carex laeviculmis
Alaska	AK	Carex lapponica	Carex lapponica
Alaska	AK	Carex lasiocarpa var. americana	Carex lasiocarpa
Alaska	AK	Carex laxa	Carex laxa
Alaska	AK	Carex lenticularis var. dolia	Carex lenticularis
Alaska	AK	Carex lenticularis var. limnophila	Carex lenticularis
Alaska	AK	Carex leptalea ssp. leptalea	Carex leptalea
Alaska	AK	Carex limosa	Carex limosa
Alaska	AK	Carex livida var. radicaulis	Carex livida
Alaska	AK	Carex loliacea	Carex loliacea
Alaska	AK	Carex lyngbyei	Carex lyngbyei
Alaska	AK	Carex mackenziei	Carex mackenziei
Alaska	AK	Carex macloviana	Carex macloviana
Alaska	AK	Carex macrocephala	Carex macrocephala
Alaska	AK	Carex macrochaeta	Carex macrochaeta
Alaska	AK	Carex magellanica ssp. irrigua	Carex magellanica
Alaska	AK	Carex marina ssp. marina	Carex marina
Alaska	AK	Carex maritima	Carex maritima
Alaska	AK	Carex media	Carex media
Alaska	AK	Carex membranacea	Carex membranacea
Alaska	AK	Carex mertensii	Carex mertensii
Alaska	AK	Carex microchaeta ssp. microchaeta	Carex microchaeta
Alaska	AK	Carex microchaeta ssp. nesophila	Carex microchaeta
Alaska	AK	Carex microglochin	Carex microglochin
Alaska	AK	Carex micropoda	Carex micropoda
Alaska	AK	Carex microptera	Carex microptera
Alaska	AK	Carex myosuroides	Carex myosuroides
Alaska	AK	Carex nardina var. hepburnii	Carex nardina
Alaska	AK	Carex nigricans	Carex nigricans
Alaska	AK	Carex obtusata	Carex obtusata
Alaska	AK	Carex pachystachya	Carex pachystachya
Alaska	AK	Carex parryana	Carex parryana
Alaska	AK	Carex pauciflora	Carex pauciflora
Alaska	AK	Carex paysonis	Carex paysonis
Alaska	AK	Carex peckii	Carex peckii
Alaska	AK	Carex petasata	Carex petasata
Alaska	AK	Carex petricosa	Carex petricosa
Alaska	AK	Carex phaeocephala	Carex phaeocephala
Alaska	AK	Carex pluriflora	Carex pluriflora
Alaska	AK	Carex podocarpa	Carex podocarpa
Alaska	AK	Carex praegracilis	Carex praegracilis
Alaska	AK	Carex praticola	Carex praticola
Alaska	AK	Carex preslii	Carex preslii
Alaska	AK	Carex ramenskii	Carex ramenskii
Alaska	AK	Carex rariflora	Carex rariflora
Alaska	AK	Carex rossii	Carex rossii
Alaska	AK	Carex rostrata	Carex rostrata
Alaska	AK	Carex rotundata	Carex rotundata
Alaska	AK	Carex rupestris	Carex rupestris
Alaska	AK	Carex sabulosa	Carex sabulosa
Alaska	AK	Carex sartwellii	Carex sartwellii
Alaska	AK	Carex saxatilis	Carex saxatilis
Alaska	AK	Carex scirpoidea ssp. scirpoidea	Carex scirpoidea
Alaska	AK	Carex scirpoidea ssp. stenochlaena	Carex scirpoidea
Alaska	AK	Carex siccata	Carex siccata
Alaska	AK	Carex simpliciuscula	Carex simpliciuscula
Alaska	AK	Carex spectabilis	Carex spectabilis
Alaska	AK	Carex sprengelii	Carex sprengelii
Alaska	AK	Carex stipata var. stipata	Carex stipata
Alaska	AK	Carex stylosa	Carex stylosa
Alaska	AK	Carex subspathacea	Carex subspathacea
Alaska	AK	Carex supina var. spaniocarpa	Carex supina
Alaska	AK	Carex sychnocephala	Carex sychnocephala
Alaska	AK	Carex tahoensis	Carex tahoensis
Alaska	AK	Carex tenuiflora	Carex tenuiflora
Alaska	AK	Carex ursina	Carex ursina
Alaska	AK	Carex utriculata	Carex utriculata
Alaska	AK	Carex vaginata	Carex vaginata
Alaska	AK	Carex viridula ssp. viridula	Carex viridula
Alaska	AK	Carex williamsii	Carex williamsii
Alaska	AK	Carex X kenaica	Carex kenaica
Alaska	AK	Carex X oneillii	Carex oneillii
Alaska	AK	Carex X paludivagans	Carex paludivagans
Alaska	AK	Carex X physocarpoides	Carex physocarpoides
Alaska	AK	Carex xerantica	Carex xerantica
Alaska	AK	Cassiope lycopodioides	Cassiope lycopodioides
Alaska	AK	Cassiope mertensiana ssp. mertensiana	Cassiope mertensiana
Alaska	AK	Cassiope tetragona ssp. saximontana	Cassiope tetragona
Alaska	AK	Cassiope tetragona ssp. tetragona	Cassiope tetragona
Alaska	AK	Castilleja annua	Castilleja annua
Alaska	AK	Castilleja chrymactis	Castilleja chrymactis
Alaska	AK	Castilleja elegans	Castilleja elegans
Alaska	AK	Castilleja haydenii	Castilleja haydenii
Alaska	AK	Castilleja hyperborea	Castilleja hyperborea
Alaska	AK	Castilleja miniata var. dixonii	Castilleja miniata
Alaska	AK	Castilleja miniata var. miniata	Castilleja miniata
Alaska	AK	Castilleja pallida var. caudata	Castilleja pallida
Alaska	AK	Castilleja pallida var. yukonis	Castilleja pallida
Alaska	AK	Castilleja parviflora var. albida	Castilleja parviflora
Alaska	AK	Castilleja parviflora var. parviflora	Castilleja parviflora
Alaska	AK	Castilleja raupii	Castilleja raupii
Alaska	AK	Castilleja tenuis	Castilleja tenuis
Alaska	AK	Castilleja unalaschcensis	Castilleja unalaschcensis
Alaska	AK	Catabrosa aquatica	Catabrosa aquatica
Alaska	AK	Cerastium aleuticum	Cerastium aleuticum
Alaska	AK	Cerastium arvense ssp. strictum	Cerastium arvense
Alaska	AK	Cerastium beeringianum	Cerastium beeringianum
Alaska	AK	Cerastium bialynickii	Cerastium bialynickii
Alaska	AK	Cerastium fischerianum	Cerastium fischerianum
Alaska	AK	Cerastium maximum	Cerastium maximum
Alaska	AK	Cerastium regelii	Cerastium regelii
Alaska	AK	Ceratophyllum demersum	Ceratophyllum demersum
Alaska	AK	Chamaedaphne calyculata	Chamaedaphne calyculata
Alaska	AK	Chamaenerion angustifolium ssp. angustifolium	Chamaenerion angustifolium
Alaska	AK	Chamaenerion angustifolium ssp. circumvagum	Chamaenerion angustifolium
Alaska	AK	Chamaenerion latifolium	Chamaenerion latifolium
Alaska	AK	Chamaerhodos erecta	Chamaerhodos erecta
Alaska	AK	Chenopodiastrum simplex	Chenopodiastrum simplex
Alaska	AK	Chenopodium berlandieri var. zschackei	Chenopodium berlandieri
Alaska	AK	Chenopodium leptophyllum	Chenopodium leptophyllum
Alaska	AK	Cherleria arctica	Cherleria arctica
Alaska	AK	Cherleria biflora	Cherleria biflora
Alaska	AK	Cherleria dicranoides	Cherleria dicranoides
Alaska	AK	Cherleria obtusiloba	Cherleria obtusiloba
Alaska	AK	Cherleria yukonensis	Cherleria yukonensis
Alaska	AK	Chimaphila umbellata ssp. occidentalis	Chimaphila umbellata
Alaska	AK	Chrysosplenium rosendahlii	Chrysosplenium rosendahlii
Alaska	AK	Chrysosplenium tetrandrum	Chrysosplenium tetrandrum
Alaska	AK	Chrysosplenium wrightii	Chrysosplenium wrightii
Alaska	AK	Cicuta bulbifera	Cicuta bulbifera
Alaska	AK	Cicuta douglasii	Cicuta douglasii
Alaska	AK	Cicuta maculata var. angustifolia	Cicuta maculata
Alaska	AK	Cicuta virosa	Cicuta virosa
Alaska	AK	Cinna latifolia	Cinna latifolia
Alaska	AK	Circaea alpina ssp. alpina	Circaea alpina
Alaska	AK	Circaea alpina ssp. pacifica	Circaea alpina
Alaska	AK	Cirsium edule var. edule	Cirsium edule
Alaska	AK	Cirsium edule var. macounii	Cirsium edule
Alaska	AK	Cirsium kamtschaticum	Cirsium kamtschaticum
Alaska	AK	Claytonia acutifolia	Claytonia acutifolia
Alaska	AK	Claytonia arctica	Claytonia arctica
Alaska	AK	Claytonia multiscapa ssp. czukczorum	Claytonia multiscapa
Alaska	AK	Claytonia parviflora ssp. parviflora	Claytonia parviflora
Alaska	AK	Claytonia sarmentosa	Claytonia sarmentosa
Alaska	AK	Claytonia scammaniana	Claytonia scammaniana
Alaska	AK	Claytonia sibirica	Claytonia sibirica
Alaska	AK	Claytonia tuberosa	Claytonia tuberosa
Alaska	AK	Clinopodium douglasii	Clinopodium douglasii
Alaska	AK	Clintonia uniflora	Clintonia uniflora
Alaska	AK	Cnidium cnidiifolium	Cnidium cnidiifolium
Alaska	AK	Cochlearia groenlandica	Cochlearia groenlandica
Alaska	AK	Cochlearia sessilifolia	Cochlearia sessilifolia
Alaska	AK	Collinsia parviflora	Collinsia parviflora
Alaska	AK	Comarum palustre	Comarum palustre
Alaska	AK	Comastoma tenellum	Comastoma tenellum
Alaska	AK	Conioselinum pacificum	Conioselinum pacificum
Alaska	AK	Coptidium lapponicum	Coptidium lapponicum
Alaska	AK	Coptidium pallasii	Coptidium pallasii
Alaska	AK	Coptis aspleniifolia	Coptis aspleniifolia
Alaska	AK	Coptis trifolia	Coptis trifolia
Alaska	AK	Corallorhiza mertensiana	Corallorhiza mertensiana
Alaska	AK	Corallorhiza trifida	Corallorhiza trifida
Alaska	AK	Corispermum ochotense var. alaskanum	Corispermum ochotense
Alaska	AK	Corispermum ochotense var. ochotense	Corispermum ochotense
Alaska	AK	Cornus alba ssp. occidentalis	Cornus alba
Alaska	AK	Cornus alba ssp. stolonifera	Cornus alba
Alaska	AK	Cornus canadensis	Cornus canadensis
Alaska	AK	Cornus suecica	Cornus suecica
Alaska	AK	Cornus unalaschkensis	Cornus unalaschkensis
Alaska	AK	Cornus X intermedia	Cornus intermedia
Alaska	AK	Corydalis arctica	Corydalis arctica
Alaska	AK	Corydalis aurea ssp. aurea	Corydalis aurea
Alaska	AK	Crassula aquatica	Crassula aquatica
Alaska	AK	Crataegus douglasii	Crataegus douglasii
Alaska	AK	Crataegus gaylussacia	Crataegus gaylussacia
Alaska	AK	Crucihimalaya bursifolia	Crucihimalaya bursifolia
Alaska	AK	Cryptogramma acrostichoides	Cryptogramma acrostichoides
Alaska	AK	Cryptogramma sitchensis	Cryptogramma sitchensis
Alaska	AK	Cryptogramma stelleri	Cryptogramma stelleri
Alaska	AK	Cupressus nootkatensis	Cupressus nootkatensis
Alaska	AK	Cypripedium guttatum	Cypripedium guttatum
Alaska	AK	Cypripedium montanum	Cypripedium montanum
Alaska	AK	Cypripedium parviflorum var. exiliens	Cypripedium parviflorum
Alaska	AK	Cypripedium parviflorum var. pubescens	Cypripedium parviflorum
Alaska	AK	Cypripedium passerinum	Cypripedium passerinum
Alaska	AK	Cypripedium X alaskanum	Cypripedium alaskanum
Alaska	AK	Cypripedium yatabeanum	Cypripedium yatabeanum
Alaska	AK	Cystopteris fragilis	Cystopteris fragilis
Alaska	AK	Cystopteris montana	Cystopteris montana
Alaska	AK	Dactylorhiza aristata var. aristata	Dactylorhiza aristata
Alaska	AK	Dactylorhiza aristata var. kodiakensis	Dactylorhiza aristata
Alaska	AK	Dactylorhiza viridis	Dactylorhiza viridis
Alaska	AK	Danthonia intermedia	Danthonia intermedia
Alaska	AK	Danthonia spicata	Danthonia spicata
Alaska	AK	Dasiphora fruticosa ssp. floribunda	Dasiphora fruticosa
Alaska	AK	Delphinium brachycentrum	Delphinium brachycentrum
Alaska	AK	Delphinium chamissonis	Delphinium chamissonis
Alaska	AK	Delphinium glaucum	Delphinium glaucum
Alaska	AK	Delphinium X nutans	Delphinium nutans
Alaska	AK	Dendrolycopodium dendroideum	Dendrolycopodium dendroideum
Alaska	AK	Deschampsia cespitosa ssp. beringensis	Deschampsia cespitosa
Alaska	AK	Deschampsia cespitosa ssp. cespitosa	Deschampsia cespitosa
Alaska	AK	Deschampsia cespitosa ssp. septentrionalis	Deschampsia cespitosa
Alaska	AK	Descurainia incana	Descurainia incana
Alaska	AK	Descurainia sophioides	Descurainia sophioides
Alaska	AK	Dianthus repens	Dianthus repens
Alaska	AK	Diapensia lapponica var. obovata	Diapensia lapponica
Alaska	AK	Diphasiastrum alpinum	Diphasiastrum alpinum
Alaska	AK	Diphasiastrum complanatum	Diphasiastrum complanatum
Alaska	AK	Diphasiastrum sitchense	Diphasiastrum sitchense
Alaska	AK	Draba albertina	Draba albertina
Alaska	AK	Draba aleutica	Draba aleutica
Alaska	AK	Draba aurea	Draba aurea
Alaska	AK	Draba bennettii	Draba bennettii
Alaska	AK	Draba borealis	Draba borealis
Alaska	AK	Draba cana	Draba cana
Alaska	AK	Draba chamissonis	Draba chamissonis
Alaska	AK	Draba cinerea	Draba cinerea
Alaska	AK	Draba corymbosa	Draba corymbosa
Alaska	AK	Draba crassifolia	Draba crassifolia
Alaska	AK	Draba densifolia	Draba densifolia
Alaska	AK	Draba fladnizensis	Draba fladnizensis
Alaska	AK	Draba glabella	Draba glabella
Alaska	AK	Draba grandis	Draba grandis
Alaska	AK	Draba healyi	Draba healyi
Alaska	AK	Draba incerta	Draba incerta
Alaska	AK	Draba juvenilis	Draba juvenilis
Alaska	AK	Draba lactea	Draba lactea
Alaska	AK	Draba lonchocarpa	Draba lonchocarpa
Alaska	AK	Draba macounii	Draba macounii
Alaska	AK	Draba micropetala	Draba micropetala
Alaska	AK	Draba mulliganii	Draba mulliganii
Alaska	AK	Draba murrayi	Draba murrayi
Alaska	AK	Draba nivalis	Draba nivalis
Alaska	AK	Draba oblongata	Draba oblongata
Alaska	AK	Draba ogilviensis	Draba ogilviensis
Alaska	AK	Draba oligosperma	Draba oligosperma
Alaska	AK	Draba palanderiana	Draba palanderiana
Alaska	AK	Draba pauciflora	Draba pauciflora
Alaska	AK	Draba pilosa	Draba pilosa
Alaska	AK	Draba porsildii	Draba porsildii
Alaska	AK	Draba praealta	Draba praealta
Alaska	AK	Draba ruaxes	Draba ruaxes
Alaska	AK	Draba stenoloba	Draba stenoloba
Alaska	AK	Draba stenopetala	Draba stenopetala
Alaska	AK	Draba subcapitata	Draba subcapitata
Alaska	AK	Draba ventosa	Draba ventosa
Alaska	AK	Dracocephalum parviflorum	Dracocephalum parviflorum
Alaska	AK	Drosera anglica	Drosera anglica
Alaska	AK	Drosera rotundifolia var. gracilis	Drosera rotundifolia
Alaska	AK	Drosera rotundifolia var. rotundifolia	Drosera rotundifolia
Alaska	AK	Drosera X obovata	Drosera obovata
Alaska	AK	Dryas ajanensis ssp. beringensis	Dryas ajanensis
Alaska	AK	Dryas alaskensis	Dryas alaskensis
Alaska	AK	Dryas drummondii	Dryas drummondii
Alaska	AK	Dryas hookeriana	Dryas hookeriana
Alaska	AK	Dryas incisa	Dryas incisa
Alaska	AK	Dryas integrifolia ssp. integrifolia	Dryas integrifolia
Alaska	AK	Dryas integrifolia ssp. sylvatica	Dryas integrifolia
Alaska	AK	Drymocallis convallaria	Drymocallis convallaria
Alaska	AK	Dryopteris expansa	Dryopteris expansa
Alaska	AK	Dryopteris fragrans	Dryopteris fragrans
Alaska	AK	Dulichium arundinaceum var. arundinaceum	Dulichium arundinaceum
Alaska	AK	Dupontia fisheri	Dupontia fisheri
Alaska	AK	Elaeagnus commutata	Elaeagnus commutata
Alaska	AK	Eleocharis acicularis	Eleocharis acicularis
Alaska	AK	Eleocharis kamtschatica	Eleocharis kamtschatica
Alaska	AK	Eleocharis mamillata	Eleocharis mamillata
Alaska	AK	Eleocharis nitida	Eleocharis nitida
Alaska	AK	Eleocharis palustris	Eleocharis palustris
Alaska	AK	Eleocharis quinqueflora	Eleocharis quinqueflora
Alaska	AK	Elliottia pyroliflora	Elliottia pyroliflora
Alaska	AK	Elodea canadensis	Elodea canadensis
Alaska	AK	Elymus alaskanus ssp. alaskanus	Elymus alaskanus
Alaska	AK	Elymus alaskanus ssp. hyperarcticus	Elymus alaskanus
Alaska	AK	Elymus alaskanus ssp. latiglumis	Elymus alaskanus
Alaska	AK	Elymus glaucus ssp. glaucus	Elymus glaucus
Alaska	AK	Elymus glaucus ssp. virescens	Elymus glaucus
Alaska	AK	Elymus hirsutus	Elymus hirsutus
Alaska	AK	Elymus lanceolatus ssp. lanceolatus	Elymus lanceolatus
Alaska	AK	Elymus lanceolatus ssp. psammophilus	Elymus lanceolatus
Alaska	AK	Elymus macrourus	Elymus macrourus
Alaska	AK	Elymus trachycaulus ssp. subsecundus	Elymus trachycaulus
Alaska	AK	Elymus trachycaulus ssp. trachycaulus	Elymus trachycaulus
Alaska	AK	Elymus X palmerensis	Elymus palmerensis
Alaska	AK	Elymus X yukonensis	Elymus yukonensis
Alaska	AK	Empetrum nigrum	Empetrum nigrum
Alaska	AK	Epilobium anagallidifolium	Epilobium anagallidifolium
Alaska	AK	Epilobium arcticum	Epilobium arcticum
Alaska	AK	Epilobium ciliatum ssp. ciliatum	Epilobium ciliatum
Alaska	AK	Epilobium ciliatum ssp. glandulosum	Epilobium ciliatum
Alaska	AK	Epilobium clavatum	Epilobium clavatum
Alaska	AK	Epilobium davuricum	Epilobium davuricum
Alaska	AK	Epilobium hornemannii ssp. behringianum	Epilobium hornemannii
Alaska	AK	Epilobium hornemannii ssp. hornemannii	Epilobium hornemannii
Alaska	AK	Epilobium lactiflorum	Epilobium lactiflorum
Alaska	AK	Epilobium leptocarpum	Epilobium leptocarpum
Alaska	AK	Epilobium leptophyllum	Epilobium leptophyllum
Alaska	AK	Epilobium luteum	Epilobium luteum
Alaska	AK	Epilobium palustre	Epilobium palustre
Alaska	AK	Epilobium X treleaseanum	Epilobium treleaseanum
Alaska	AK	Equisetum arvense	Equisetum arvense
Alaska	AK	Equisetum fluviatile	Equisetum fluviatile
Alaska	AK	Equisetum hyemale var. affine	Equisetum hyemale
Alaska	AK	Equisetum palustre	Equisetum palustre
Alaska	AK	Equisetum pratense	Equisetum pratense
Alaska	AK	Equisetum scirpoides	Equisetum scirpoides
Alaska	AK	Equisetum sylvaticum	Equisetum sylvaticum
Alaska	AK	Equisetum variegatum var. alaskanum	Equisetum variegatum
Alaska	AK	Equisetum variegatum var. variegatum	Equisetum variegatum
Alaska	AK	Equisetum X litorale	Equisetum litorale
Alaska	AK	Equisetum X mackayi	Equisetum mackayi
Alaska	AK	Eremogone capillaris var. capillaris	Eremogone capillaris
Alaska	AK	Erigeron acris var. kamtschaticus	Erigeron acris
Alaska	AK	Erigeron caespitosus	Erigeron caespitosus
Alaska	AK	Erigeron compositus	Erigeron compositus
Alaska	AK	Erigeron denalii	Erigeron denalii
Alaska	AK	Erigeron elatus	Erigeron elatus
Alaska	AK	Erigeron glabellus var. pubescens	Erigeron glabellus
Alaska	AK	Erigeron glacialis var. glacialis	Erigeron glacialis
Alaska	AK	Erigeron hultenii	Erigeron hultenii
Alaska	AK	Erigeron humilis	Erigeron humilis
Alaska	AK	Erigeron hyperboreus	Erigeron hyperboreus
Alaska	AK	Erigeron lonchophyllus	Erigeron lonchophyllus
Alaska	AK	Erigeron muirii	Erigeron muirii
Alaska	AK	Erigeron nivalis	Erigeron nivalis
Alaska	AK	Erigeron ochroleucus	Erigeron ochroleucus
Alaska	AK	Erigeron peregrinus var. peregrinus	Erigeron peregrinus
Alaska	AK	Erigeron porsildii	Erigeron porsildii
Alaska	AK	Erigeron purpuratus	Erigeron purpuratus
Alaska	AK	Erigeron uniflorus var. eriocephalus	Erigeron uniflorus
Alaska	AK	Erigeron yukonensis	Erigeron yukonensis
Alaska	AK	Eriogonum flavum var. aquilinum	Eriogonum flavum
Alaska	AK	Eriophorum angustifolium ssp. angustifolium	Eriophorum angustifolium
Alaska	AK	Eriophorum angustifolium ssp. triste	Eriophorum angustifolium
Alaska	AK	Eriophorum brachyantherum var. brachyantherum	Eriophorum brachyantherum
Alaska	AK	Eriophorum callitrix	Eriophorum callitrix
Alaska	AK	Eriophorum chamissonis	Eriophorum chamissonis
Alaska	AK	Eriophorum gracile	Eriophorum gracile
Alaska	AK	Eriophorum komarovii	Eriophorum komarovii
Alaska	AK	Eriophorum scheuchzeri ssp. scheuchzeri	Eriophorum scheuchzeri
Alaska	AK	Eriophorum vaginatum var. spissum	Eriophorum vaginatum
Alaska	AK	Eriophorum vaginatum var. vaginatum	Eriophorum vaginatum
Alaska	AK	Eriophorum viridicarinatum	Eriophorum viridicarinatum
Alaska	AK	Eriophorum X beringianum	Eriophorum beringianum
Alaska	AK	Eriophorum X churchillianum	Eriophorum churchillianum
Alaska	AK	Eriophorum X porsildii	Eriophorum porsildii
Alaska	AK	Eritrichium arenosum	Eritrichium arenosum
Alaska	AK	Eritrichium aretioides	Eritrichium aretioides
Alaska	AK	Eritrichium boreale	Eritrichium boreale
Alaska	AK	Eritrichium chamissonis	Eritrichium chamissonis
Alaska	AK	Eritrichium grandiflorum	Eritrichium grandiflorum
Alaska	AK	Eritrichium splendens	Eritrichium splendens
Alaska	AK	Eritrichium villosum	Eritrichium villosum
Alaska	AK	Erysimum capitatum	Erysimum capitatum
Alaska	AK	Erysimum coarctatum	Erysimum coarctatum
Alaska	AK	Erysimum inconspicuum	Erysimum inconspicuum
Alaska	AK	Erysimum pallasii	Erysimum pallasii
Alaska	AK	Erythranthe guttata	Erythranthe guttata
Alaska	AK	Erythranthe lewisii	Erythranthe lewisii
Alaska	AK	Euphrasia mollis	Euphrasia mollis
Alaska	AK	Euphrasia subarctica	Euphrasia subarctica
Alaska	AK	Eurybia merita	Eurybia merita
Alaska	AK	Eurybia sibirica	Eurybia sibirica
Alaska	AK	Eutrema edwardsii	Eutrema edwardsii
Alaska	AK	Festuca altaica	Festuca altaica
Alaska	AK	Festuca auriculata	Festuca auriculata
Alaska	AK	Festuca baffinensis	Festuca baffinensis
Alaska	AK	Festuca brachyphylla ssp. brachyphylla	Festuca brachyphylla
Alaska	AK	Festuca brevissima	Festuca brevissima
Alaska	AK	Festuca edlundiae	Festuca edlundiae
Alaska	AK	Festuca lenensis	Festuca lenensis
Alaska	AK	Festuca minutiflora	Festuca minutiflora
Alaska	AK	Festuca occidentalis	Festuca occidentalis
Alaska	AK	Festuca rubra ssp. arctica	Festuca rubra
Alaska	AK	Festuca rubra ssp. aucta	Festuca rubra
Alaska	AK	Festuca rubra ssp. pruinosa	Festuca rubra
Alaska	AK	Festuca rubra ssp. rubra	Festuca rubra
Alaska	AK	Festuca rubra ssp. secunda	Festuca rubra
Alaska	AK	Festuca saximontana var. saximontana	Festuca saximontana
Alaska	AK	Festuca subulata	Festuca subulata
Alaska	AK	Festuca viviparoidea ssp. krajinae	Festuca viviparoidea
Alaska	AK	Festuca viviparoidea ssp. viviparoidea	Festuca viviparoidea
Alaska	AK	Fragaria chiloensis ssp. pacifica	Fragaria chiloensis
Alaska	AK	Fragaria virginiana ssp. glauca	Fragaria virginiana
Alaska	AK	Fritillaria camschatcensis	Fritillaria camschatcensis
Alaska	AK	Gagea serotina	Gagea serotina
Alaska	AK	Gaillardia pulchella var. pulchella	Gaillardia pulchella
Alaska	AK	Galearis rotundifolia	Galearis rotundifolia
Alaska	AK	Galium aparine	Galium aparine
Alaska	AK	Galium boreale	Galium boreale
Alaska	AK	Galium kamtschaticum	Galium kamtschaticum
Alaska	AK	Galium trifidum ssp. columbianum	Galium trifidum
Alaska	AK	Galium trifidum ssp. subbiflorum	Galium trifidum
Alaska	AK	Galium trifidum ssp. trifidum	Galium trifidum
Alaska	AK	Galium triflorum	Galium triflorum
Alaska	AK	Gaultheria pyroloides	Gaultheria pyroloides
Alaska	AK	Gaultheria shallon	Gaultheria shallon
Alaska	AK	Gentiana algida	Gentiana algida
Alaska	AK	Gentiana douglasiana	Gentiana douglasiana
Alaska	AK	Gentiana glauca	Gentiana glauca
Alaska	AK	Gentiana platypetala	Gentiana platypetala
Alaska	AK	Gentiana prostrata	Gentiana prostrata
Alaska	AK	Gentianella amarella ssp. acuta	Gentianella amarella
Alaska	AK	Gentianella auriculata	Gentianella auriculata
Alaska	AK	Gentianella propinqua ssp. aleutica	Gentianella propinqua
Alaska	AK	Gentianella propinqua ssp. propinqua	Gentianella propinqua
Alaska	AK	Gentianopsis detonsa ssp. detonsa	Gentianopsis detonsa
Alaska	AK	Gentianopsis detonsa ssp. yukonensis	Gentianopsis detonsa
Alaska	AK	Geocaulon lividum	Geocaulon lividum
Alaska	AK	Geranium bicknellii	Geranium bicknellii
Alaska	AK	Geranium erianthum	Geranium erianthum
Alaska	AK	Geum aleppicum	Geum aleppicum
Alaska	AK	Geum calthifolium	Geum calthifolium
Alaska	AK	Geum glaciale	Geum glaciale
Alaska	AK	Geum macrophyllum var. macrophyllum	Geum macrophyllum
Alaska	AK	Geum macrophyllum var. perincisum	Geum macrophyllum
Alaska	AK	Geum rossii	Geum rossii
Alaska	AK	Geum X macranthum	Geum macranthum
Alaska	AK	Glehnia littoralis ssp. leiocarpa	Glehnia littoralis
Alaska	AK	Glyceria alnasteretum	Glyceria alnasteretum
Alaska	AK	Glyceria borealis	Glyceria borealis
Alaska	AK	Glyceria grandis var. grandis	Glyceria grandis
Alaska	AK	Glyceria grandis var. komarovii	Glyceria grandis
Alaska	AK	Glyceria leptostachya	Glyceria leptostachya
Alaska	AK	Glyceria pulchella	Glyceria pulchella
Alaska	AK	Glyceria striata	Glyceria striata
Alaska	AK	Gnaphalium palustre	Gnaphalium palustre
Alaska	AK	Goodyera oblongifolia	Goodyera oblongifolia
Alaska	AK	Goodyera repens	Goodyera repens
Alaska	AK	Grindelia humilis var. humilis	Grindelia humilis
Alaska	AK	Gymnocarpium continentale	Gymnocarpium continentale
Alaska	AK	Gymnocarpium disjunctum	Gymnocarpium disjunctum
Alaska	AK	Gymnocarpium dryopteris	Gymnocarpium dryopteris
Alaska	AK	Gymnocarpium X brittonianum	Gymnocarpium brittonianum
Alaska	AK	Gymnocarpium X intermedium	Gymnocarpium intermedium
Alaska	AK	Hackelia deflexa var. americana	Hackelia deflexa
Alaska	AK	Halerpestes cymbalaria ssp. saximontana	Halerpestes cymbalaria
Alaska	AK	Hammarbya paludosa	Hammarbya paludosa
Alaska	AK	Harrimanella stelleriana	Harrimanella stelleriana
Alaska	AK	Hedysarum americanum	Hedysarum americanum
Alaska	AK	Hedysarum boreale ssp. mackenziei	Hedysarum boreale
Alaska	AK	Heracleum maximum	Heracleum maximum
Alaska	AK	Heuchera glabra	Heuchera glabra
Alaska	AK	Hieracium albiflorum	Hieracium albiflorum
Alaska	AK	Hieracium triste	Hieracium triste
Alaska	AK	Hieracium umbellatum	Hieracium umbellatum
Alaska	AK	Hippuris lanceolata	Hippuris lanceolata
Alaska	AK	Hippuris montana	Hippuris montana
Alaska	AK	Hippuris tetraphylla	Hippuris tetraphylla
Alaska	AK	Hippuris vulgaris	Hippuris vulgaris
Alaska	AK	Honckenya peploides ssp. diffusa	Honckenya peploides
Alaska	AK	Honckenya peploides ssp. major	Honckenya peploides
Alaska	AK	Hordeum brachyantherum ssp. brachyantherum	Hordeum brachyantherum
Alaska	AK	Hordeum jubatum ssp. jubatum	Hordeum jubatum
Alaska	AK	Hordeum jubatum ssp. X intermedium	Hordeum jubatum
Alaska	AK	Hulteniella integrifolia	Hulteniella integrifolia
Alaska	AK	Huperzia arctica	Huperzia arctica
Alaska	AK	Huperzia continentalis	Huperzia continentalis
Alaska	AK	Huperzia miyoshiana	Huperzia miyoshiana
Alaska	AK	Huperzia occidentalis	Huperzia occidentalis
Alaska	AK	Huperzia selago	Huperzia selago
Alaska	AK	Hymenophyllum wrightii	Hymenophyllum wrightii
Alaska	AK	Hypericum anagalloides	Hypericum anagalloides
Alaska	AK	Hypopitys americana	Hypopitys americana
Alaska	AK	Impatiens noli-tangere	Impatiens noli-tangere
Alaska	AK	Iris setosa var. interior	Iris setosa
Alaska	AK	Iris setosa var. setosa	Iris setosa
Alaska	AK	Isoetes echinospora ssp. muricata	Isoetes echinospora
Alaska	AK	Isoetes maritima	Isoetes maritima
Alaska	AK	Isoetes occidentalis	Isoetes occidentalis
Alaska	AK	Isoetes X pseudotruncata	Isoetes pseudotruncata
Alaska	AK	Isoetes X truncata	Isoetes truncata
Alaska	AK	Isolepis cernua	Isolepis cernua
Alaska	AK	Juncus albescens	Juncus albescens
Alaska	AK	Juncus alpinoarticulatus ssp. americanus	Juncus alpinoarticulatus
Alaska	AK	Juncus arcticus ssp. alaskanus	Juncus arcticus
Alaska	AK	Juncus articulatus	Juncus articulatus
Alaska	AK	Juncus balticus ssp. ater	Juncus balticus
Alaska	AK	Juncus biglumis	Juncus biglumis
Alaska	AK	Juncus bufonius var. bufonius	Juncus bufonius
Alaska	AK	Juncus castaneus ssp. castaneus var. castaneus	Juncus castaneus
Alaska	AK	Juncus castaneus ssp. leucochlamys	Juncus castaneus
Alaska	AK	Juncus covillei	Juncus covillei
Alaska	AK	Juncus drummondii	Juncus drummondii
Alaska	AK	Juncus ensifolius	Juncus ensifolius
Alaska	AK	Juncus falcatus ssp. sitchensis	Juncus falcatus
Alaska	AK	Juncus filiformis	Juncus filiformis
Alaska	AK	Juncus haenkei	Juncus haenkei
Alaska	AK	Juncus mertensianus	Juncus mertensianus
Alaska	AK	Juncus nodosus	Juncus nodosus
Alaska	AK	Juncus ranarius	Juncus ranarius
Alaska	AK	Juncus stygius ssp. americanus	Juncus stygius
Alaska	AK	Juncus supiniformis	Juncus supiniformis
Alaska	AK	Juncus tenuis	Juncus tenuis
Alaska	AK	Juncus triglumis	Juncus triglumis
Alaska	AK	Juniperus communis var. charlottensis	Juniperus communis
Alaska	AK	Juniperus communis var. depressa	Juniperus communis
Alaska	AK	Juniperus communis var. kelleyi	Juniperus communis
Alaska	AK	Juniperus horizontalis	Juniperus horizontalis
Alaska	AK	Kalmia microphylla	Kalmia microphylla
Alaska	AK	Kalmia procumbens	Kalmia procumbens
Alaska	AK	Koeleria asiatica ssp. atroviolacea	Koeleria asiatica
Alaska	AK	Koeleria macrantha	Koeleria macrantha
Alaska	AK	Koenigia alaskana var. alaskana	Koenigia alaskana
Alaska	AK	Koenigia alaskana var. glabrescens	Koenigia alaskana
Alaska	AK	Koenigia islandica	Koenigia islandica
Alaska	AK	Lactuca biennis	Lactuca biennis
Alaska	AK	Lagotis glauca ssp. glauca	Lagotis glauca
Alaska	AK	Lagotis glauca ssp. lanceolata	Lagotis glauca
Alaska	AK	Lappula occidentalis var. occidentalis	Lappula occidentalis
Alaska	AK	Larix laricina	Larix laricina
Alaska	AK	Lathyrus japonicus	Lathyrus japonicus
Alaska	AK	Lathyrus ochroleucus	Lathyrus ochroleucus
Alaska	AK	Lathyrus palustris	Lathyrus palustris
Alaska	AK	Lathyrus venosus	Lathyrus venosus
Alaska	AK	Lemna trisulca	Lemna trisulca
Alaska	AK	Lemna turionifera	Lemna turionifera
Alaska	AK	Lepidium densiflorum	Lepidium densiflorum
Alaska	AK	Leptarrhena pyrolifolia	Leptarrhena pyrolifolia
Alaska	AK	Leymus innovatus ssp. velutinus	Leymus innovatus
Alaska	AK	Leymus mollis ssp. mollis	Leymus mollis
Alaska	AK	Leymus mollis ssp. villosissimus	Leymus mollis
Alaska	AK	Ligusticum calderi	Ligusticum calderi
Alaska	AK	Ligusticum scoticum ssp. hultenii	Ligusticum scoticum
Alaska	AK	Lilaeopsis occidentalis	Lilaeopsis occidentalis
Alaska	AK	Limosella aquatica	Limosella aquatica
Alaska	AK	Linnaea borealis ssp. borealis	Linnaea borealis
Alaska	AK	Linnaea borealis ssp. longiflora	Linnaea borealis
Alaska	AK	Linum lewisii var. lewisii	Linum lewisii
Alaska	AK	Lobelia dortmanna	Lobelia dortmanna
Alaska	AK	Lomatogonium rotatum var. fontanum	Lomatogonium rotatum
Alaska	AK	Lomatogonium rotatum var. rotatum	Lomatogonium rotatum
Alaska	AK	Lonicera involucrata var. involucrata	Lonicera involucrata
Alaska	AK	Luetkea pectinata	Luetkea pectinata
Alaska	AK	Lupinus arcticus ssp. arcticus	Lupinus arcticus
Alaska	AK	Lupinus kuschei	Lupinus kuschei
Alaska	AK	Lupinus lepidus	Lupinus lepidus
Alaska	AK	Lupinus nootkatensis var. fruticosus	Lupinus nootkatensis
Alaska	AK	Lupinus nootkatensis var. nootkatensis	Lupinus nootkatensis
Alaska	AK	Lupinus polyphyllus ssp. polyphyllus var. polyphyllus	Lupinus polyphyllus
Alaska	AK	Luzula arcuata ssp. unalaschkensis	Luzula arcuata
Alaska	AK	Luzula comosa var. comosa	Luzula comosa
Alaska	AK	Luzula confusa	Luzula confusa
Alaska	AK	Luzula groenlandica var. groenlandica	Luzula groenlandica
Alaska	AK	Luzula kjellmaniana	Luzula kjellmaniana
Alaska	AK	Luzula kobayasii	Luzula kobayasii
Alaska	AK	Luzula multiflora ssp. frigida	Luzula multiflora
Alaska	AK	Luzula nivalis	Luzula nivalis
Alaska	AK	Luzula parviflora	Luzula parviflora
Alaska	AK	Luzula piperi	Luzula piperi
Alaska	AK	Luzula rufescens	Luzula rufescens
Alaska	AK	Luzula spicata	Luzula spicata
Alaska	AK	Luzula wahlenbergii	Luzula wahlenbergii
Alaska	AK	Lycopodiella inundata	Lycopodiella inundata
Alaska	AK	Lycopodium clavatum	Lycopodium clavatum
Alaska	AK	Lycopodium lagopus	Lycopodium lagopus
Alaska	AK	Lycopus americanus	Lycopus americanus
Alaska	AK	Lycopus asper	Lycopus asper
Alaska	AK	Lycopus uniflorus var. uniflorus	Lycopus uniflorus
Alaska	AK	Lysichiton americanus	Lysichiton americanus
Alaska	AK	Lysimachia ciliata	Lysimachia ciliata
Alaska	AK	Lysimachia europaea	Lysimachia europaea
Alaska	AK	Lysimachia maritima	Lysimachia maritima
Alaska	AK	Lysimachia thyrsiflora	Lysimachia thyrsiflora
Alaska	AK	Maianthemum amplexicaule	Maianthemum amplexicaule
Alaska	AK	Maianthemum dilatatum	Maianthemum dilatatum
Alaska	AK	Maianthemum stellatum	Maianthemum stellatum
Alaska	AK	Malaxis monophyllos var. brachypoda	Malaxis monophyllos
Alaska	AK	Malaxis monophyllos var. diphyllos	Malaxis monophyllos
Alaska	AK	Malaxis monophyllos var. monophyllos	Malaxis monophyllos
Alaska	AK	Malus fusca	Malus fusca
Alaska	AK	Matricaria discoidea	Matricaria discoidea
Alaska	AK	Matteuccia struthiopteris var. pensylvanica	Matteuccia struthiopteris
Alaska	AK	Melica subulata	Melica subulata
Alaska	AK	Menyanthes trifoliata	Menyanthes trifoliata
Alaska	AK	Mertensia drummondii	Mertensia drummondii
Alaska	AK	Mertensia eastwoodiae	Mertensia eastwoodiae
Alaska	AK	Mertensia maritima var. maritima	Mertensia maritima
Alaska	AK	Mertensia maritima var. tenella	Mertensia maritima
Alaska	AK	Mertensia paniculata var. alaskana	Mertensia paniculata
Alaska	AK	Mertensia paniculata var. paniculata	Mertensia paniculata
Alaska	AK	Micranthes calycina	Micranthes calycina
Alaska	AK	Micranthes ferruginea	Micranthes ferruginea
Alaska	AK	Micranthes foliolosa	Micranthes foliolosa
Alaska	AK	Micranthes hieraciifolia ssp. hieraciifolia	Micranthes hieraciifolia
Alaska	AK	Micranthes hieraciifolia ssp. longifolia	Micranthes hieraciifolia
Alaska	AK	Micranthes lyallii ssp. hultenii	Micranthes lyallii
Alaska	AK	Micranthes nelsoniana var. carlottae	Micranthes nelsoniana
Alaska	AK	Micranthes nelsoniana var. insularis	Micranthes nelsoniana
Alaska	AK	Micranthes nelsoniana var. nelsoniana	Micranthes nelsoniana
Alaska	AK	Micranthes nivalis	Micranthes nivalis
Alaska	AK	Micranthes nudicaulis	Micranthes nudicaulis
Alaska	AK	Micranthes occidentalis	Micranthes occidentalis
Alaska	AK	Micranthes porsildiana	Micranthes porsildiana
Alaska	AK	Micranthes razshivinii	Micranthes razshivinii
Alaska	AK	Micranthes reflexa	Micranthes reflexa
Alaska	AK	Micranthes rufopilosa	Micranthes rufopilosa
Alaska	AK	Micranthes spicata	Micranthes spicata
Alaska	AK	Micranthes tenuis	Micranthes tenuis
Alaska	AK	Micranthes tolmiei	Micranthes tolmiei
Alaska	AK	Micranthes unalaschcensis	Micranthes unalaschcensis
Alaska	AK	Microseris borealis	Microseris borealis
Alaska	AK	Mitella nuda	Mitella nuda
Alaska	AK	Moehringia lateriflora	Moehringia lateriflora
Alaska	AK	Moneses uniflora	Moneses uniflora
Alaska	AK	Monotropa uniflora	Monotropa uniflora
Alaska	AK	Montia chamissoi	Montia chamissoi
Alaska	AK	Montia fontana	Montia fontana
Alaska	AK	Montia parvifolia	Montia parvifolia
Alaska	AK	Montia vassilievii	Montia vassilievii
Alaska	AK	Mulgedium oblongifolium	Mulgedium oblongifolium
Alaska	AK	Myosotis asiatica	Myosotis asiatica
Alaska	AK	Myrica gale	Myrica gale
Alaska	AK	Myriophyllum farwellii	Myriophyllum farwellii
Alaska	AK	Myriophyllum sibiricum	Myriophyllum sibiricum
Alaska	AK	Myriophyllum verticillatum	Myriophyllum verticillatum
Alaska	AK	Nabalus alatus	Nabalus alatus
Alaska	AK	Najas flexilis	Najas flexilis
Alaska	AK	Neottia banksiana	Neottia banksiana
Alaska	AK	Neottia borealis	Neottia borealis
Alaska	AK	Neottia convallarioides	Neottia convallarioides
Alaska	AK	Neottia cordata	Neottia cordata
Alaska	AK	Nephrophyllidium crista-galli	Nephrophyllidium crista-galli
Alaska	AK	Noccaea arctica	Noccaea arctica
Alaska	AK	Nuphar polysepala	Nuphar polysepala
Alaska	AK	Nymphaea odorata ssp. odorata	Nymphaea odorata
Alaska	AK	Nymphaea tetragona	Nymphaea tetragona
Alaska	AK	Oenanthe sarmentosa	Oenanthe sarmentosa
Alaska	AK	Ophioglossum pusillum	Ophioglossum pusillum
Alaska	AK	Oplopanax horridus	Oplopanax horridus
Alaska	AK	Oreocarya shackletteana	Oreocarya shackletteana
Alaska	AK	Oreopteris quelpartensis	Oreopteris quelpartensis
Alaska	AK	Orthilia secunda	Orthilia secunda
Alaska	AK	Osmorhiza berteroi	Osmorhiza berteroi
Alaska	AK	Osmorhiza depauperata	Osmorhiza depauperata
Alaska	AK	Osmorhiza purpurea	Osmorhiza purpurea
Alaska	AK	Oxybasis glauca var. salina	Oxybasis glauca
Alaska	AK	Oxybasis rubra var. humilis	Oxybasis rubra
Alaska	AK	Oxybasis rubra var. rubra	Oxybasis rubra
Alaska	AK	Oxygraphis glacialis	Oxygraphis glacialis
Alaska	AK	Oxyria digyna	Oxyria digyna
Alaska	AK	Oxytropis arctica var. arctica	Oxytropis arctica
Alaska	AK	Oxytropis arctica var. barnebyana	Oxytropis arctica
Alaska	AK	Oxytropis borealis var. borealis	Oxytropis borealis
Alaska	AK	Oxytropis borealis var. sulphurea	Oxytropis borealis
Alaska	AK	Oxytropis borealis var. viscida	Oxytropis borealis
Alaska	AK	Oxytropis bryophila	Oxytropis bryophila
Alaska	AK	Oxytropis campestris var. jordalii	Oxytropis campestris
Alaska	AK	Oxytropis campestris var. roaldii	Oxytropis campestris
Alaska	AK	Oxytropis campestris var. varians	Oxytropis campestris
Alaska	AK	Oxytropis czukotica	Oxytropis czukotica
Alaska	AK	Oxytropis deflexa var. foliolosa	Oxytropis deflexa
Alaska	AK	Oxytropis deflexa var. sericea	Oxytropis deflexa
Alaska	AK	Oxytropis huddelsonii	Oxytropis huddelsonii
Alaska	AK	Oxytropis kobukensis	Oxytropis kobukensis
Alaska	AK	Oxytropis kokrinensis	Oxytropis kokrinensis
Alaska	AK	Oxytropis koyukukensis	Oxytropis koyukukensis
Alaska	AK	Oxytropis maydelliana	Oxytropis maydelliana
Alaska	AK	Oxytropis mertensiana	Oxytropis mertensiana
Alaska	AK	Oxytropis scammaniana	Oxytropis scammaniana
Alaska	AK	Oxytropis splendens	Oxytropis splendens
Alaska	AK	Ozomelis trifida	Ozomelis trifida
Alaska	AK	Packera heterophylla	Packera heterophylla
Alaska	AK	Packera hyperborealis	Packera hyperborealis
Alaska	AK	Packera indecora	Packera indecora
Alaska	AK	Packera ogotorukensis	Packera ogotorukensis
Alaska	AK	Packera pauciflora	Packera pauciflora
Alaska	AK	Packera paupercula var. paupercula	Packera paupercula
Alaska	AK	Packera streptanthifolia	Packera streptanthifolia
Alaska	AK	Packera subnuda var. moresbiensis	Packera subnuda
Alaska	AK	Papaver alboroseum	Papaver alboroseum
Alaska	AK	Papaver gorodkovii	Papaver gorodkovii
Alaska	AK	Papaver hultenii	Papaver hultenii
Alaska	AK	Papaver kluanense	Papaver kluanense
Alaska	AK	Papaver lapponicum ssp. occidentale	Papaver lapponicum
Alaska	AK	Papaver macounii ssp. discolor	Papaver macounii
Alaska	AK	Papaver macounii ssp. macounii	Papaver macounii
Alaska	AK	Papaver mcconnellii	Papaver mcconnellii
Alaska	AK	Papaver nudicaule ssp. americanum	Papaver nudicaule
Alaska	AK	Papaver radicatum ssp. alaskanum	Papaver radicatum
Alaska	AK	Papaver walpolei	Papaver walpolei
Alaska	AK	Parasenecio auriculatus	Parasenecio auriculatus
Alaska	AK	Parnassia fimbriata	Parnassia fimbriata
Alaska	AK	Parnassia kotzebuei	Parnassia kotzebuei
Alaska	AK	Parnassia palustris var. palustris	Parnassia palustris
Alaska	AK	Parnassia palustris var. tenuis	Parnassia palustris
Alaska	AK	Parnassia parviflora	Parnassia parviflora
Alaska	AK	Parrya nauruaq	Parrya nauruaq
Alaska	AK	Parrya nudicaulis	Parrya nudicaulis
Alaska	AK	Pectiantia pentandra	Pectiantia pentandra
Alaska	AK	Pedicularis capitata	Pedicularis capitata
Alaska	AK	Pedicularis chamissonis	Pedicularis chamissonis
Alaska	AK	Pedicularis groenlandica	Pedicularis groenlandica
Alaska	AK	Pedicularis hirsuta	Pedicularis hirsuta
Alaska	AK	Pedicularis labradorica var. labradorica	Pedicularis labradorica
Alaska	AK	Pedicularis lanata	Pedicularis lanata
Alaska	AK	Pedicularis langsdorffii ssp. arctica	Pedicularis langsdorffii
Alaska	AK	Pedicularis langsdorffii ssp. langsdorffii	Pedicularis langsdorffii
Alaska	AK	Pedicularis lapponica	Pedicularis lapponica
Alaska	AK	Pedicularis oederi	Pedicularis oederi
Alaska	AK	Pedicularis ornithorhynchos	Pedicularis ornithorhynchos
Alaska	AK	Pedicularis parviflora	Pedicularis parviflora
Alaska	AK	Pedicularis pennellii	Pedicularis pennellii
Alaska	AK	Pedicularis sudetica ssp. albolabiata	Pedicularis sudetica
Alaska	AK	Pedicularis sudetica ssp. arctoeuropaea	Pedicularis sudetica
Alaska	AK	Pedicularis sudetica ssp. pacifica	Pedicularis sudetica
Alaska	AK	Pedicularis verticillata	Pedicularis verticillata
Alaska	AK	Penstemon gormanii	Penstemon gormanii
Alaska	AK	Penstemon procerus var. procerus	Penstemon procerus
Alaska	AK	Penstemon serrulatus	Penstemon serrulatus
Alaska	AK	Persicaria amphibia	Persicaria amphibia
Alaska	AK	Persicaria hydropiperoides	Persicaria hydropiperoides
Alaska	AK	Persicaria lapathifolia	Persicaria lapathifolia
Alaska	AK	Petasites frigidus var. frigidus	Petasites frigidus
Alaska	AK	Petasites frigidus var. palmatus	Petasites frigidus
Alaska	AK	Petasites frigidus var. sagittatus	Petasites frigidus
Alaska	AK	Petasites frigidus var. X vitifolius	Petasites frigidus
Alaska	AK	Phacelia franklinii	Phacelia franklinii
Alaska	AK	Phacelia mollis	Phacelia mollis
Alaska	AK	Phacelia sericea ssp. sericea	Phacelia sericea
Alaska	AK	Phalaris arundinacea	Phalaris arundinacea
Alaska	AK	Phegopteris connectilis	Phegopteris connectilis
Alaska	AK	Phippsia algida	Phippsia algida
Alaska	AK	Phippsia concinna var. algidiformis	Phippsia concinna
Alaska	AK	Phleum alpinum	Phleum alpinum
Alaska	AK	Phlox richardsonii ssp. alaskensis	Phlox richardsonii
Alaska	AK	Phlox richardsonii ssp. borealis	Phlox richardsonii
Alaska	AK	Phlox richardsonii ssp. richardsonii	Phlox richardsonii
Alaska	AK	Phyllodoce aleutica	Phyllodoce aleutica
Alaska	AK	Phyllodoce caerulea	Phyllodoce caerulea
Alaska	AK	Phyllodoce empetriformis	Phyllodoce empetriformis
Alaska	AK	Phyllodoce glanduliflora	Phyllodoce glanduliflora
Alaska	AK	Phyllospadix scouleri	Phyllospadix scouleri
Alaska	AK	Phyllospadix serrulatus	Phyllospadix serrulatus
Alaska	AK	Physaria arctica	Physaria arctica
Alaska	AK	Physaria calderi	Physaria calderi
Alaska	AK	Physocarpus capitatus	Physocarpus capitatus
Alaska	AK	Picea glauca	Picea glauca
Alaska	AK	Picea mariana	Picea mariana
Alaska	AK	Picea sitchensis	Picea sitchensis
Alaska	AK	Picea X lutzii	Picea lutzii
Alaska	AK	Picris hieracioides ssp. kamtschatica	Picris hieracioides
Alaska	AK	Pinguicula macroceras	Pinguicula macroceras
Alaska	AK	Pinguicula villosa	Pinguicula villosa
Alaska	AK	Pinguicula vulgaris	Pinguicula vulgaris
Alaska	AK	Pinus contorta var. contorta	Pinus contorta
Alaska	AK	Pinus contorta var. latifolia	Pinus contorta
Alaska	AK	Plagiobothrys hispidulus	Plagiobothrys hispidulus
Alaska	AK	Plagiobothrys orientalis	Plagiobothrys orientalis
Alaska	AK	Plantago canescens	Plantago canescens
Alaska	AK	Plantago eriopoda	Plantago eriopoda
Alaska	AK	Plantago macrocarpa	Plantago macrocarpa
Alaska	AK	Plantago maritima var. juncoides	Plantago maritima
Alaska	AK	Platanthera aquilonis	Platanthera aquilonis
Alaska	AK	Platanthera chorisiana	Platanthera chorisiana
Alaska	AK	Platanthera convallariifolia	Platanthera convallariifolia
Alaska	AK	Platanthera dilatata var. albiflora	Platanthera dilatata
Alaska	AK	Platanthera dilatata var. dilatata	Platanthera dilatata
Alaska	AK	Platanthera dilatata var. leucostachys	Platanthera dilatata
Alaska	AK	Platanthera ephemerantha	Platanthera ephemerantha
Alaska	AK	Platanthera huronensis	Platanthera huronensis
Alaska	AK	Platanthera hyperborea	Platanthera hyperborea
Alaska	AK	Platanthera obtusata	Platanthera obtusata
Alaska	AK	Platanthera orbiculata	Platanthera orbiculata
Alaska	AK	Platanthera stricta	Platanthera stricta
Alaska	AK	Platanthera tipuloides var. behringiana	Platanthera tipuloides
Alaska	AK	Platanthera unalascensis	Platanthera unalascensis
Alaska	AK	Pleuropogon sabinei	Pleuropogon sabinei
Alaska	AK	Poa abbreviata ssp. abbreviata	Poa abbreviata
Alaska	AK	Poa abbreviata ssp. pattersonii	Poa abbreviata
Alaska	AK	Poa alpina ssp. alpina	Poa alpina
Alaska	AK	Poa arctica ssp. arctica	Poa arctica
Alaska	AK	Poa arctica ssp. lanata	Poa arctica
Alaska	AK	Poa arctostepporum	Poa arctostepporum
Alaska	AK	Poa glauca ssp. glauca	Poa glauca
Alaska	AK	Poa glauca ssp. pekulnejensis	Poa glauca
Alaska	AK	Poa hartzii ssp. alaskana	Poa hartzii
Alaska	AK	Poa hartzii ssp. vrangelica	Poa hartzii
Alaska	AK	Poa interior	Poa interior
Alaska	AK	Poa laxiflora	Poa laxiflora
Alaska	AK	Poa leptocoma	Poa leptocoma
Alaska	AK	Poa macrantha	Poa macrantha
Alaska	AK	Poa macrocalyx	Poa macrocalyx
Alaska	AK	Poa palustris	Poa palustris
Alaska	AK	Poa paucispicula	Poa paucispicula
Alaska	AK	Poa porsildii	Poa porsildii
Alaska	AK	Poa pratensis ssp. alpigena	Poa pratensis
Alaska	AK	Poa pratensis ssp. colpodea	Poa pratensis
Alaska	AK	Poa pseudoabbreviata	Poa pseudoabbreviata
Alaska	AK	Poa secunda ssp. secunda	Poa secunda
Alaska	AK	Poa stenantha var. vivipara	Poa stenantha
Alaska	AK	Poa sublanata	Poa sublanata
Alaska	AK	Podagrostis aequivalvis	Podagrostis aequivalvis
Alaska	AK	Podagrostis humilis	Podagrostis humilis
Alaska	AK	Podistera macounii	Podistera macounii
Alaska	AK	Podistera yukonensis	Podistera yukonensis
Alaska	AK	Polemonium acutiflorum	Polemonium acutiflorum
Alaska	AK	Polemonium boreale ssp. boreale	Polemonium boreale
Alaska	AK	Polemonium boreale ssp. macranthum	Polemonium boreale
Alaska	AK	Polemonium pulcherrimum var. lindleyi	Polemonium pulcherrimum
Alaska	AK	Polemonium pulcherrimum var. pulcherrimum	Polemonium pulcherrimum
Alaska	AK	Polemonium villosissimum	Polemonium villosissimum
Alaska	AK	Polygonum achoreum	Polygonum achoreum
Alaska	AK	Polygonum aviculare ssp. buxiforme	Polygonum aviculare
Alaska	AK	Polygonum fowleri ssp. fowleri	Polygonum fowleri
Alaska	AK	Polygonum humifusum ssp. caurianum	Polygonum humifusum
Alaska	AK	Polygonum minimum	Polygonum minimum
Alaska	AK	Polygonum ramosissimum ssp. prolificum	Polygonum ramosissimum
Alaska	AK	Polypodium glycyrrhiza	Polypodium glycyrrhiza
Alaska	AK	Polypodium sibiricum	Polypodium sibiricum
Alaska	AK	Polystichum aleuticum	Polystichum aleuticum
Alaska	AK	Polystichum andersonii	Polystichum andersonii
Alaska	AK	Polystichum braunii	Polystichum braunii
Alaska	AK	Polystichum kruckebergii	Polystichum kruckebergii
Alaska	AK	Polystichum lonchitis	Polystichum lonchitis
Alaska	AK	Polystichum microchlamys	Polystichum microchlamys
Alaska	AK	Polystichum munitum	Polystichum munitum
Alaska	AK	Polystichum setigerum	Polystichum setigerum
Alaska	AK	Populus balsamifera ssp. balsamifera	Populus balsamifera
Alaska	AK	Populus balsamifera ssp. trichocarpa	Populus balsamifera
Alaska	AK	Populus tremuloides	Populus tremuloides
Alaska	AK	Potamogeton alpinus	Potamogeton alpinus
Alaska	AK	Potamogeton berchtoldii ssp. berchtoldii	Potamogeton berchtoldii
Alaska	AK	Potamogeton epihydrus	Potamogeton epihydrus
Alaska	AK	Potamogeton foliosus	Potamogeton foliosus
Alaska	AK	Potamogeton friesii	Potamogeton friesii
Alaska	AK	Potamogeton gramineus	Potamogeton gramineus
Alaska	AK	Potamogeton natans	Potamogeton natans
Alaska	AK	Potamogeton obtusifolius	Potamogeton obtusifolius
Alaska	AK	Potamogeton praelongus	Potamogeton praelongus
Alaska	AK	Potamogeton pusillus	Potamogeton pusillus
Alaska	AK	Potamogeton richardsonii	Potamogeton richardsonii
Alaska	AK	Potamogeton robbinsii	Potamogeton robbinsii
Alaska	AK	Potamogeton sibiricus	Potamogeton sibiricus
Alaska	AK	Potamogeton zosteriformis	Potamogeton zosteriformis
Alaska	AK	Potentilla anachoretica	Potentilla anachoretica
Alaska	AK	Potentilla anserina ssp. groenlandica	Potentilla anserina
Alaska	AK	Potentilla anserina ssp. pacifica	Potentilla anserina
Alaska	AK	Potentilla anserina ssp. yukonensis	Potentilla anserina
Alaska	AK	Potentilla arenosa ssp. arenosa	Potentilla arenosa
Alaska	AK	Potentilla biflora	Potentilla biflora
Alaska	AK	Potentilla bimundorum	Potentilla bimundorum
Alaska	AK	Potentilla brunnescens	Potentilla brunnescens
Alaska	AK	Potentilla crebridens ssp. hemicryophila	Potentilla crebridens
Alaska	AK	Potentilla drummondii	Potentilla drummondii
Alaska	AK	Potentilla elegans	Potentilla elegans
Alaska	AK	Potentilla fragiformis	Potentilla fragiformis
Alaska	AK	Potentilla furcata	Potentilla furcata
Alaska	AK	Potentilla glaucophylla var. glaucophylla	Potentilla glaucophylla
Alaska	AK	Potentilla gracilis var. fastigiata	Potentilla gracilis
Alaska	AK	Potentilla gracilis var. gracilis	Potentilla gracilis
Alaska	AK	Potentilla hippiana	Potentilla hippiana
Alaska	AK	Potentilla hyparctica ssp. elatior	Potentilla hyparctica
Alaska	AK	Potentilla hyparctica ssp. hyparctica	Potentilla hyparctica
Alaska	AK	Potentilla nana	Potentilla nana
Alaska	AK	Potentilla nivea	Potentilla nivea
Alaska	AK	Potentilla norvegica	Potentilla norvegica
Alaska	AK	Potentilla ovina var. ovina	Potentilla ovina
Alaska	AK	Potentilla pensylvanica	Potentilla pensylvanica
Alaska	AK	Potentilla psychrophila	Potentilla psychrophila
Alaska	AK	Potentilla pulchella	Potentilla pulchella
Alaska	AK	Potentilla rubricaulis	Potentilla rubricaulis
Alaska	AK	Potentilla stipularis	Potentilla stipularis
Alaska	AK	Potentilla subgorodkovii	Potentilla subgorodkovii
Alaska	AK	Potentilla subvahliana	Potentilla subvahliana
Alaska	AK	Potentilla tikhomirovii	Potentilla tikhomirovii
Alaska	AK	Potentilla villosa	Potentilla villosa
Alaska	AK	Potentilla villosula	Potentilla villosula
Alaska	AK	Potentilla vulcanicola	Potentilla vulcanicola
Alaska	AK	Primula anvilensis	Primula anvilensis
Alaska	AK	Primula borealis	Primula borealis
Alaska	AK	Primula cuneifolia ssp. cuneifolia	Primula cuneifolia
Alaska	AK	Primula cuneifolia ssp. saxifragifolia	Primula cuneifolia
Alaska	AK	Primula egaliksensis	Primula egaliksensis
Alaska	AK	Primula frigida	Primula frigida
Alaska	AK	Primula incana	Primula incana
Alaska	AK	Primula jeffreyi	Primula jeffreyi
Alaska	AK	Primula mistassinica	Primula mistassinica
Alaska	AK	Primula nutans	Primula nutans
Alaska	AK	Primula pauciflora var. macrocarpa	Primula pauciflora
Alaska	AK	Primula pauciflora var. pauciflora	Primula pauciflora
Alaska	AK	Primula pumila	Primula pumila
Alaska	AK	Primula tschuktschorum	Primula tschuktschorum
Alaska	AK	Prunella vulgaris ssp. aleutica	Prunella vulgaris
Alaska	AK	Prunella vulgaris ssp. lanceolata	Prunella vulgaris
Alaska	AK	Prunus virginiana var. demissa	Prunus virginiana
Alaska	AK	Pseudocherleria macrocarpa	Pseudocherleria macrocarpa
Alaska	AK	Pseudoroegneria spicata ssp. spicata	Pseudoroegneria spicata
Alaska	AK	Psilocarphus elatior	Psilocarphus elatior
Alaska	AK	Pteridium aquilinum var. pubescens	Pteridium aquilinum
Alaska	AK	Puccinellia andersonii	Puccinellia andersonii
Alaska	AK	Puccinellia angustata	Puccinellia angustata
Alaska	AK	Puccinellia arctica	Puccinellia arctica
Alaska	AK	Puccinellia banksiensis	Puccinellia banksiensis
Alaska	AK	Puccinellia hauptiana	Puccinellia hauptiana
Alaska	AK	Puccinellia hultenii	Puccinellia hultenii
Alaska	AK	Puccinellia kamtschatica	Puccinellia kamtschatica
Alaska	AK	Puccinellia nutkaensis	Puccinellia nutkaensis
Alaska	AK	Puccinellia nuttalliana	Puccinellia nuttalliana
Alaska	AK	Puccinellia phryganodes ssp. geniculata	Puccinellia phryganodes
Alaska	AK	Puccinellia phryganodes ssp. phryganodes	Puccinellia phryganodes
Alaska	AK	Puccinellia pumila	Puccinellia pumila
Alaska	AK	Puccinellia sublaevis	Puccinellia sublaevis
Alaska	AK	Puccinellia tenella ssp. langeana	Puccinellia tenella
Alaska	AK	Puccinellia vaginata	Puccinellia vaginata
Alaska	AK	Puccinellia vahliana	Puccinellia vahliana
Alaska	AK	Puccinellia wrightii	Puccinellia wrightii
Alaska	AK	Pulsatilla nuttalliana	Pulsatilla nuttalliana
Alaska	AK	Pyrola asarifolia ssp. asarifolia	Pyrola asarifolia
Alaska	AK	Pyrola asarifolia ssp. bracteata	Pyrola asarifolia
Alaska	AK	Pyrola chlorantha	Pyrola chlorantha
Alaska	AK	Pyrola grandiflora	Pyrola grandiflora
Alaska	AK	Pyrola minor	Pyrola minor
Alaska	AK	Ranunculus abortivus	Ranunculus abortivus
Alaska	AK	Ranunculus acris var. frigidus	Ranunculus acris
Alaska	AK	Ranunculus aquatilis	Ranunculus aquatilis
Alaska	AK	Ranunculus arcticus	Ranunculus arcticus
Alaska	AK	Ranunculus codyanus	Ranunculus codyanus
Alaska	AK	Ranunculus eschscholtzii var. eschscholtzii	Ranunculus eschscholtzii
Alaska	AK	Ranunculus flammula var. ovalis	Ranunculus flammula
Alaska	AK	Ranunculus flammula var. reptans	Ranunculus flammula
Alaska	AK	Ranunculus gmelinii	Ranunculus gmelinii
Alaska	AK	Ranunculus grayi	Ranunculus grayi
Alaska	AK	Ranunculus hyperboreus	Ranunculus hyperboreus
Alaska	AK	Ranunculus macounii	Ranunculus macounii
Alaska	AK	Ranunculus nivalis	Ranunculus nivalis
Alaska	AK	Ranunculus occidentalis var. brevistylis	Ranunculus occidentalis
Alaska	AK	Ranunculus occidentalis var. nelsonii	Ranunculus occidentalis
Alaska	AK	Ranunculus orthorhynchus var. orthorhynchus	Ranunculus orthorhynchus
Alaska	AK	Ranunculus pacificus	Ranunculus pacificus
Alaska	AK	Ranunculus pensylvanicus	Ranunculus pensylvanicus
Alaska	AK	Ranunculus ponojensis	Ranunculus ponojensis
Alaska	AK	Ranunculus pygmaeus var. pygmaeus	Ranunculus pygmaeus
Alaska	AK	Ranunculus sabinei	Ranunculus sabinei
Alaska	AK	Ranunculus sceleratus var. multifidus	Ranunculus sceleratus
Alaska	AK	Ranunculus subrigidus	Ranunculus subrigidus
Alaska	AK	Ranunculus sulphureus	Ranunculus sulphureus
Alaska	AK	Ranunculus trichophyllus	Ranunculus trichophyllus
Alaska	AK	Ranunculus turneri	Ranunculus turneri
Alaska	AK	Ranunculus uncinatus	Ranunculus uncinatus
Alaska	AK	Rhinanthus borealis	Rhinanthus borealis
Alaska	AK	Rhodiola integrifolia ssp. integrifolia	Rhodiola integrifolia
Alaska	AK	Rhododendron groenlandicum	Rhododendron groenlandicum
Alaska	AK	Rhododendron lapponicum var. lapponicum	Rhododendron lapponicum
Alaska	AK	Rhododendron lapponicum var. parvifolium	Rhododendron lapponicum
Alaska	AK	Rhododendron menziesii ssp. menziesii	Rhododendron menziesii
Alaska	AK	Rhododendron tomentosum	Rhododendron tomentosum
Alaska	AK	Rhynchospora alba	Rhynchospora alba
Alaska	AK	Ribes bracteosum	Ribes bracteosum
Alaska	AK	Ribes glandulosum	Ribes glandulosum
Alaska	AK	Ribes hudsonianum var. hudsonianum	Ribes hudsonianum
Alaska	AK	Ribes lacustre	Ribes lacustre
Alaska	AK	Ribes laxiflorum	Ribes laxiflorum
Alaska	AK	Ribes oxyacanthoides ssp. oxyacanthoides	Ribes oxyacanthoides
Alaska	AK	Ribes triste	Ribes triste
Alaska	AK	Romanzoffia sitchensis	Romanzoffia sitchensis
Alaska	AK	Romanzoffia unalaschcensis var. glabriuscula	Romanzoffia unalaschcensis
Alaska	AK	Romanzoffia unalaschcensis var. unalaschcensis	Romanzoffia unalaschcensis
Alaska	AK	Rorippa barbareifolia	Rorippa barbareifolia
Alaska	AK	Rorippa curvisiliqua	Rorippa curvisiliqua
Alaska	AK	Rorippa palustris ssp. hispida	Rorippa palustris
Alaska	AK	Rorippa palustris ssp. palustris	Rorippa palustris
Alaska	AK	Rosa acicularis ssp. acicularis	Rosa acicularis
Alaska	AK	Rosa acicularis ssp. sayi	Rosa acicularis
Alaska	AK	Rosa nutkana ssp. nutkana	Rosa nutkana
Alaska	AK	Rosa woodsii ssp. woodsii	Rosa woodsii
Alaska	AK	Rosa X engelmannii ssp. occidentalis	Rosa engelmannii
Alaska	AK	Rubus arcticus ssp. acaulis	Rubus arcticus
Alaska	AK	Rubus arcticus ssp. arcticus	Rubus arcticus
Alaska	AK	Rubus arcticus ssp. stellatus	Rubus arcticus
Alaska	AK	Rubus chamaemorus	Rubus chamaemorus
Alaska	AK	Rubus idaeus ssp. strigosus	Rubus idaeus
Alaska	AK	Rubus leucodermis	Rubus leucodermis
Alaska	AK	Rubus parviflorus	Rubus parviflorus
Alaska	AK	Rubus pedatus	Rubus pedatus
Alaska	AK	Rubus pubescens var. pubescens	Rubus pubescens
Alaska	AK	Rubus spectabilis	Rubus spectabilis
Alaska	AK	Rubus X alaskensis	Rubus alaskensis
Alaska	AK	Rumex alpestris	Rumex alpestris
Alaska	AK	Rumex arcticus	Rumex arcticus
Alaska	AK	Rumex aureostigmatias	Rumex aureostigmatias
Alaska	AK	Rumex beringensis	Rumex beringensis
Alaska	AK	Rumex fueginus	Rumex fueginus
Alaska	AK	Rumex krausei	Rumex krausei
Alaska	AK	Rumex occidentalis var. occidentalis	Rumex occidentalis
Alaska	AK	Rumex pseudoxyria	Rumex pseudoxyria
Alaska	AK	Rumex sibiricus	Rumex sibiricus
Alaska	AK	Rumex transitorius	Rumex transitorius
Alaska	AK	Ruppia maritima	Ruppia maritima
Alaska	AK	Ruppia spiralis	Ruppia spiralis
Alaska	AK	Sabulina austromontana	Sabulina austromontana
Alaska	AK	Sabulina dawsonensis	Sabulina dawsonensis
Alaska	AK	Sabulina elegans	Sabulina elegans
Alaska	AK	Sabulina michauxii	Sabulina michauxii
Alaska	AK	Sabulina rossii	Sabulina rossii
Alaska	AK	Sabulina rubella	Sabulina rubella
Alaska	AK	Sabulina stricta	Sabulina stricta
Alaska	AK	Sagina decumbens ssp. occidentalis	Sagina decumbens
Alaska	AK	Sagina maxima ssp. crassicaulis	Sagina maxima
Alaska	AK	Sagina maxima ssp. maxima	Sagina maxima
Alaska	AK	Sagina nivalis	Sagina nivalis
Alaska	AK	Sagina saginoides	Sagina saginoides
Alaska	AK	Sagittaria cuneata	Sagittaria cuneata
Alaska	AK	Salicornia depressa	Salicornia depressa
Alaska	AK	Salix alaxensis var. alaxensis	Salix alaxensis
Alaska	AK	Salix alaxensis var. longistylis	Salix alaxensis
Alaska	AK	Salix arbusculoides	Salix arbusculoides
Alaska	AK	Salix arctica	Salix arctica
Alaska	AK	Salix arctophila	Salix arctophila
Alaska	AK	Salix athabascensis	Salix athabascensis
Alaska	AK	Salix barclayi	Salix barclayi
Alaska	AK	Salix barrattiana	Salix barrattiana
Alaska	AK	Salix bebbiana	Salix bebbiana
Alaska	AK	Salix boothii	Salix boothii
Alaska	AK	Salix candida	Salix candida
Alaska	AK	Salix chamissonis	Salix chamissonis
Alaska	AK	Salix commutata	Salix commutata
Alaska	AK	Salix fuscescens	Salix fuscescens
Alaska	AK	Salix glauca var. acutifolia	Salix glauca
Alaska	AK	Salix glauca var. stipulata	Salix glauca
Alaska	AK	Salix hastata	Salix hastata
Alaska	AK	Salix hookeriana	Salix hookeriana
Alaska	AK	Salix interior	Salix interior
Alaska	AK	Salix lasiandra var. caudata	Salix lasiandra
Alaska	AK	Salix lasiandra var. lasiandra	Salix lasiandra
Alaska	AK	Salix lingulata	Salix lingulata
Alaska	AK	Salix myrtillifolia	Salix myrtillifolia
Alaska	AK	Salix nummularia	Salix nummularia
Alaska	AK	Salix ovalifolia var. arctolitoralis	Salix ovalifolia
Alaska	AK	Salix ovalifolia var. cyclophylla	Salix ovalifolia
Alaska	AK	Salix ovalifolia var. glacialis	Salix ovalifolia
Alaska	AK	Salix ovalifolia var. ovalifolia	Salix ovalifolia
Alaska	AK	Salix phlebophylla	Salix phlebophylla
Alaska	AK	Salix planifolia	Salix planifolia
Alaska	AK	Salix polaris	Salix polaris
Alaska	AK	Salix prolixa	Salix prolixa
Alaska	AK	Salix pseudomonticola	Salix pseudomonticola
Alaska	AK	Salix pulchra	Salix pulchra
Alaska	AK	Salix reticulata	Salix reticulata
Alaska	AK	Salix richardsonii	Salix richardsonii
Alaska	AK	Salix rotundifolia ssp. dodgeana	Salix rotundifolia
Alaska	AK	Salix rotundifolia ssp. rotundifolia	Salix rotundifolia
Alaska	AK	Salix scouleriana	Salix scouleriana
Alaska	AK	Salix setchelliana	Salix setchelliana
Alaska	AK	Salix sitchensis	Salix sitchensis
Alaska	AK	Salix sphenophylla	Salix sphenophylla
Alaska	AK	Salix stolonifera	Salix stolonifera
Alaska	AK	Sambucus racemosa	Sambucus racemosa
Alaska	AK	Sanguisorba canadensis ssp. latifolia	Sanguisorba canadensis
Alaska	AK	Sanguisorba menziesii	Sanguisorba menziesii
Alaska	AK	Sanguisorba officinalis	Sanguisorba officinalis
Alaska	AK	Saussurea americana	Saussurea americana
Alaska	AK	Saussurea angustifolia var. angustifolia	Saussurea angustifolia
Alaska	AK	Saussurea angustifolia var. viscida	Saussurea angustifolia
Alaska	AK	Saussurea angustifolia var. yukonensis	Saussurea angustifolia
Alaska	AK	Saussurea nuda	Saussurea nuda
Alaska	AK	Saussurea triangulata	Saussurea triangulata
Alaska	AK	Saussurea X tschuktschorum	Saussurea tschuktschorum
Alaska	AK	Saxifraga adscendens	Saxifraga adscendens
Alaska	AK	Saxifraga aizoides	Saxifraga aizoides
Alaska	AK	Saxifraga aleutica	Saxifraga aleutica
Alaska	AK	Saxifraga bracteata	Saxifraga bracteata
Alaska	AK	Saxifraga cernua	Saxifraga cernua
Alaska	AK	Saxifraga cespitosa	Saxifraga cespitosa
Alaska	AK	Saxifraga cherlerioides	Saxifraga cherlerioides
Alaska	AK	Saxifraga eschscholtzii	Saxifraga eschscholtzii
Alaska	AK	Saxifraga flagellaris ssp. platysepala	Saxifraga flagellaris
Alaska	AK	Saxifraga flagellaris ssp. setigera	Saxifraga flagellaris
Alaska	AK	Saxifraga funstonii	Saxifraga funstonii
Alaska	AK	Saxifraga hirculus ssp. compacta	Saxifraga hirculus
Alaska	AK	Saxifraga hirculus ssp. hirculus	Saxifraga hirculus
Alaska	AK	Saxifraga hirculus ssp. propinqua	Saxifraga hirculus
Alaska	AK	Saxifraga hyperborea	Saxifraga hyperborea
Alaska	AK	Saxifraga mertensiana	Saxifraga mertensiana
Alaska	AK	Saxifraga oppositifolia ssp. oppositifolia	Saxifraga oppositifolia
Alaska	AK	Saxifraga oppositifolia ssp. smalliana	Saxifraga oppositifolia
Alaska	AK	Saxifraga radiata	Saxifraga radiata
Alaska	AK	Saxifraga rivularis ssp. arctolitoralis	Saxifraga rivularis
Alaska	AK	Saxifraga serpyllifolia	Saxifraga serpyllifolia
Alaska	AK	Saxifraga tricuspidata	Saxifraga tricuspidata
Alaska	AK	Sceptridium multifidum	Sceptridium multifidum
Alaska	AK	Scheuchzeria palustris ssp. americana	Scheuchzeria palustris
Alaska	AK	Schizachne purpurascens	Schizachne purpurascens
Alaska	AK	Schoenoplectus acutus var. acutus	Schoenoplectus acutus
Alaska	AK	Schoenoplectus maritimus	Schoenoplectus maritimus
Alaska	AK	Schoenoplectus pungens var. longispicatus	Schoenoplectus pungens
Alaska	AK	Schoenoplectus subterminalis	Schoenoplectus subterminalis
Alaska	AK	Schoenoplectus tabernaemontani	Schoenoplectus tabernaemontani
Alaska	AK	Scirpus microcarpus	Scirpus microcarpus
Alaska	AK	Scolochloa festucacea	Scolochloa festucacea
Alaska	AK	Scutellaria galericulata	Scutellaria galericulata
Alaska	AK	Scutellaria lateriflora var. lateriflora	Scutellaria lateriflora
Alaska	AK	Sedum divergens	Sedum divergens
Alaska	AK	Sedum lanceolatum	Sedum lanceolatum
Alaska	AK	Sedum oreganum var. oreganum	Sedum oreganum
Alaska	AK	Selaginella densa	Selaginella densa
Alaska	AK	Selaginella selaginoides	Selaginella selaginoides
Alaska	AK	Selaginella sibirica	Selaginella sibirica
Alaska	AK	Selaginella wallacei	Selaginella wallacei
Alaska	AK	Senecio cannabifolius	Senecio cannabifolius
Alaska	AK	Senecio integerrimus var. exaltatus	Senecio integerrimus
Alaska	AK	Senecio lugens	Senecio lugens
Alaska	AK	Senecio pseudoarnica	Senecio pseudoarnica
Alaska	AK	Senecio triangularis	Senecio triangularis
Alaska	AK	Shepherdia canadensis	Shepherdia canadensis
Alaska	AK	Sibbaldia procumbens	Sibbaldia procumbens
Alaska	AK	Sidalcea hendersonii	Sidalcea hendersonii
Alaska	AK	Sieversia pentapetala	Sieversia pentapetala
Alaska	AK	Silene acaulis	Silene acaulis
Alaska	AK	Silene involucrata ssp. furcata	Silene involucrata
Alaska	AK	Silene involucrata ssp. involucrata	Silene involucrata
Alaska	AK	Silene menziesii	Silene menziesii
Alaska	AK	Silene ostenfeldii	Silene ostenfeldii
Alaska	AK	Silene repens	Silene repens
Alaska	AK	Silene soczaviana	Silene soczaviana
Alaska	AK	Silene sorensenis	Silene sorensenis
Alaska	AK	Silene uralensis ssp. ogilviensis	Silene uralensis
Alaska	AK	Silene uralensis ssp. uralensis	Silene uralensis
Alaska	AK	Silene williamsii	Silene williamsii
Alaska	AK	Sisyrinchium littorale	Sisyrinchium littorale
Alaska	AK	Sisyrinchium montanum var. montanum	Sisyrinchium montanum
Alaska	AK	Sium suave	Sium suave
Alaska	AK	Smelowskia borealis	Smelowskia borealis
Alaska	AK	Smelowskia johnsonii	Smelowskia johnsonii
Alaska	AK	Smelowskia media	Smelowskia media
Alaska	AK	Smelowskia porsildii	Smelowskia porsildii
Alaska	AK	Smelowskia pyriformis	Smelowskia pyriformis
Alaska	AK	Solanum rostratum	Solanum rostratum
Alaska	AK	Solidago bellidifolia	Solidago bellidifolia
Alaska	AK	Solidago glutinosa	Solidago glutinosa
Alaska	AK	Solidago lepida var. lepida	Solidago lepida
Alaska	AK	Solidago lepida var. salebrosa	Solidago lepida
Alaska	AK	Solidago multiradiata var. arctica	Solidago multiradiata
Alaska	AK	Solidago multiradiata var. multiradiata	Solidago multiradiata
Alaska	AK	Solidago multiradiata var. scopulorum	Solidago multiradiata
Alaska	AK	Sorbus sambucifolia	Sorbus sambucifolia
Alaska	AK	Sorbus scopulina	Sorbus scopulina
Alaska	AK	Sorbus sitchensis var. grayi	Sorbus sitchensis
Alaska	AK	Sorbus sitchensis var. sitchensis	Sorbus sitchensis
Alaska	AK	Sparganium angustifolium	Sparganium angustifolium
Alaska	AK	Sparganium emersum	Sparganium emersum
Alaska	AK	Sparganium hyperboreum	Sparganium hyperboreum
Alaska	AK	Sparganium natans	Sparganium natans
Alaska	AK	Spergularia canadensis var. occidentalis	Spergularia canadensis
Alaska	AK	Sphenopholis intermedia	Sphenopholis intermedia
Alaska	AK	Spinulum annotinum	Spinulum annotinum
Alaska	AK	Spinulum subarcticum	Spinulum subarcticum
Alaska	AK	Spiraea douglasii var. menziesii	Spiraea douglasii
Alaska	AK	Spiraea stevenii	Spiraea stevenii
Alaska	AK	Spiranthes romanzoffiana	Spiranthes romanzoffiana
Alaska	AK	Stachys chamissonis var. cooleyae	Stachys chamissonis
Alaska	AK	Stachys mexicana	Stachys mexicana
Alaska	AK	Stellaria alaskana	Stellaria alaskana
Alaska	AK	Stellaria borealis ssp. borealis	Stellaria borealis
Alaska	AK	Stellaria borealis ssp. sitchana	Stellaria borealis
Alaska	AK	Stellaria calycantha	Stellaria calycantha
Alaska	AK	Stellaria crassifolia	Stellaria crassifolia
Alaska	AK	Stellaria crispa	Stellaria crispa
Alaska	AK	Stellaria humifusa	Stellaria humifusa
Alaska	AK	Stellaria longifolia	Stellaria longifolia
Alaska	AK	Stellaria longipes ssp. longipes	Stellaria longipes
Alaska	AK	Stellaria ruscifolia ssp. aleutica	Stellaria ruscifolia
Alaska	AK	Stellaria umbellata	Stellaria umbellata
Alaska	AK	Streptopus amplexifolius	Streptopus amplexifolius
Alaska	AK	Streptopus lanceolatus var. curvipes	Streptopus lanceolatus
Alaska	AK	Streptopus streptopoides var. brevipes	Streptopus streptopoides
Alaska	AK	Struthiopteris spicant	Struthiopteris spicant
Alaska	AK	Stuckenia filiformis ssp. alpina	Stuckenia filiformis
Alaska	AK	Stuckenia filiformis ssp. filiformis	Stuckenia filiformis
Alaska	AK	Stuckenia filiformis ssp. occidentalis	Stuckenia filiformis
Alaska	AK	Stuckenia pectinata	Stuckenia pectinata
Alaska	AK	Stuckenia vaginata	Stuckenia vaginata
Alaska	AK	Suaeda calceoliformis	Suaeda calceoliformis
Alaska	AK	Subularia aquatica ssp. americana	Subularia aquatica
Alaska	AK	Swertia perennis	Swertia perennis
Alaska	AK	Symphoricarpos albus var. albus	Symphoricarpos albus
Alaska	AK	Symphoricarpos albus var. laevigatus	Symphoricarpos albus
Alaska	AK	Symphyotrichum boreale	Symphyotrichum boreale
Alaska	AK	Symphyotrichum ciliatum	Symphyotrichum ciliatum
Alaska	AK	Symphyotrichum falcatum var. falcatum	Symphyotrichum falcatum
Alaska	AK	Symphyotrichum foliaceum var. foliaceum	Symphyotrichum foliaceum
Alaska	AK	Symphyotrichum pygmaeum	Symphyotrichum pygmaeum
Alaska	AK	Symphyotrichum subspicatum	Symphyotrichum subspicatum
Alaska	AK	Symphyotrichum yukonense	Symphyotrichum yukonense
Alaska	AK	Tanacetum bipinnatum	Tanacetum bipinnatum
Alaska	AK	Taraxacum carneocoloratum	Taraxacum carneocoloratum
Alaska	AK	Taraxacum ceratophorum	Taraxacum ceratophorum
Alaska	AK	Taraxacum holmenianum	Taraxacum holmenianum
Alaska	AK	Taraxacum scopulorum	Taraxacum scopulorum
Alaska	AK	Taxus brevifolia	Taxus brevifolia
Alaska	AK	Tellima grandiflora	Tellima grandiflora
Alaska	AK	Tephroseris atropurpurea	Tephroseris atropurpurea
Alaska	AK	Tephroseris frigida	Tephroseris frigida
Alaska	AK	Tephroseris kjellmanii	Tephroseris kjellmanii
Alaska	AK	Tephroseris lindstroemii	Tephroseris lindstroemii
Alaska	AK	Tephroseris palustris	Tephroseris palustris
Alaska	AK	Tephroseris tundricola	Tephroseris tundricola
Alaska	AK	Tephroseris yukonensis	Tephroseris yukonensis
Alaska	AK	Thalictrum alpinum	Thalictrum alpinum
Alaska	AK	Thalictrum hultenii	Thalictrum hultenii
Alaska	AK	Thalictrum minus	Thalictrum minus
Alaska	AK	Thalictrum occidentale	Thalictrum occidentale
Alaska	AK	Thalictrum sparsiflorum var. richardsonii	Thalictrum sparsiflorum
Alaska	AK	Therorhodion camtschaticum	Therorhodion camtschaticum
Alaska	AK	Therorhodion glandulosum	Therorhodion glandulosum
Alaska	AK	Thuja plicata	Thuja plicata
Alaska	AK	Tiarella trifoliata var. laciniata	Tiarella trifoliata
Alaska	AK	Tiarella trifoliata var. trifoliata	Tiarella trifoliata
Alaska	AK	Tiarella trifoliata var. unifoliata	Tiarella trifoliata
Alaska	AK	Tilingia ajanensis	Tilingia ajanensis
Alaska	AK	Tofieldia coccinea	Tofieldia coccinea
Alaska	AK	Tofieldia pusilla	Tofieldia pusilla
Alaska	AK	Tolmiea menziesii	Tolmiea menziesii
Alaska	AK	Torreyochloa pallida var. pauciflora	Torreyochloa pallida
Alaska	AK	Townsendia hookeri	Townsendia hookeri
Alaska	AK	Triantha glutinosa	Triantha glutinosa
Alaska	AK	Triantha occidentalis ssp. brevistyla	Triantha occidentalis
Alaska	AK	Triantha occidentalis ssp. montana	Triantha occidentalis
Alaska	AK	Trichophorum alpinum	Trichophorum alpinum
Alaska	AK	Trichophorum cespitosum	Trichophorum cespitosum
Alaska	AK	Trichophorum pumilum	Trichophorum pumilum
Alaska	AK	Trifolium cyathiferum	Trifolium cyathiferum
Alaska	AK	Trifolium wormskioldii	Trifolium wormskioldii
Alaska	AK	Triglochin maritima	Triglochin maritima
Alaska	AK	Triglochin palustris	Triglochin palustris
Alaska	AK	Tripleurospermum maritimum ssp. phaeocephalum	Tripleurospermum maritimum
Alaska	AK	Trisetum cernuum ssp. canescens	Trisetum cernuum
Alaska	AK	Trisetum sibiricum ssp. litorale	Trisetum sibiricum
Alaska	AK	Trisetum spicatum	Trisetum spicatum
Alaska	AK	Trollius membranostylis	Trollius membranostylis
Alaska	AK	Tsuga heterophylla	Tsuga heterophylla
Alaska	AK	Tsuga mertensiana ssp. mertensiana	Tsuga mertensiana
Alaska	AK	Turritis glabra	Turritis glabra
Alaska	AK	Typha latifolia	Typha latifolia
Alaska	AK	Urtica dioica ssp. gracilis	Urtica dioica
Alaska	AK	Urtica dioica ssp. sondenii	Urtica dioica
Alaska	AK	Urtica platyphylla	Urtica platyphylla
Alaska	AK	Utricularia intermedia	Utricularia intermedia
Alaska	AK	Utricularia macrorhiza	Utricularia macrorhiza
Alaska	AK	Utricularia minor	Utricularia minor
Alaska	AK	Utricularia ochroleuca	Utricularia ochroleuca
Alaska	AK	Vaccinium alaskaense	Vaccinium alaskaense
Alaska	AK	Vaccinium cespitosum	Vaccinium cespitosum
Alaska	AK	Vaccinium membranaceum	Vaccinium membranaceum
Alaska	AK	Vaccinium ovalifolium	Vaccinium ovalifolium
Alaska	AK	Vaccinium oxycoccos	Vaccinium oxycoccos
Alaska	AK	Vaccinium parvifolium	Vaccinium parvifolium
Alaska	AK	Vaccinium uliginosum ssp. uliginosum	Vaccinium uliginosum
Alaska	AK	Vaccinium uliginosum ssp. vulcanorum	Vaccinium uliginosum
Alaska	AK	Vaccinium vitis-idaea ssp. minus	Vaccinium vitis-idaea
Alaska	AK	Vahlodea atropurpurea	Vahlodea atropurpurea
Alaska	AK	Valeriana capitata	Valeriana capitata
Alaska	AK	Valeriana sitchensis	Valeriana sitchensis
Alaska	AK	Veratrum album ssp. oxysepalum	Veratrum album
Alaska	AK	Veratrum viride	Veratrum viride
Alaska	AK	Veronica alaskensis	Veronica alaskensis
Alaska	AK	Veronica americana	Veronica americana
Alaska	AK	Veronica grandiflora	Veronica grandiflora
Alaska	AK	Veronica peregrina ssp. peregrina	Veronica peregrina
Alaska	AK	Veronica scutellata	Veronica scutellata
Alaska	AK	Veronica serpyllifolia ssp. humifusa	Veronica serpyllifolia
Alaska	AK	Veronica stelleri	Veronica stelleri
Alaska	AK	Veronica wormskjoldii ssp. nutans	Veronica wormskjoldii
Alaska	AK	Viburnum edule	Viburnum edule
Alaska	AK	Vicia americana ssp. americana	Vicia americana
Alaska	AK	Vicia nigricans ssp. gigantea	Vicia nigricans
Alaska	AK	Viola adunca var. adunca	Viola adunca
Alaska	AK	Viola biflora ssp. biflora	Viola biflora
Alaska	AK	Viola canadensis var. rugulosa	Viola canadensis
Alaska	AK	Viola epipsila var. repens	Viola epipsila
Alaska	AK	Viola glabella	Viola glabella
Alaska	AK	Viola langsdorffii	Viola langsdorffii
Alaska	AK	Viola renifolia	Viola renifolia
Alaska	AK	Viola selkirkii	Viola selkirkii
Alaska	AK	Viola sempervirens	Viola sempervirens
Alaska	AK	Wilhelmsia physodes	Wilhelmsia physodes
Alaska	AK	Woodsia alpina	Woodsia alpina
Alaska	AK	Woodsia glabella	Woodsia glabella
Alaska	AK	Woodsia ilvensis	Woodsia ilvensis
Alaska	AK	Woodsia scopulina	Woodsia scopulina
Alaska	AK	X Elyhordeum arcuatum	X Elyhordeum
Alaska	AK	X Elyhordeum chatangense	X Elyhordeum
Alaska	AK	X Elyhordeum jordalii	X Elyhordeum
Alaska	AK	X Elyhordeum macounii	X Elyhordeum
Alaska	AK	X Elyhordeum schaackianum	X Elyhordeum
Alaska	AK	X Elyleymus aleuticus	X Elyleymus
Alaska	AK	X Elyleymus colvillensis	X Elyleymus
Alaska	AK	X Elyleymus hultenii	X Elyleymus
Alaska	AK	X Leydeum littorale	X Leydeum
Alaska	AK	Zannichellia palustris	Zannichellia palustris
Alaska	AK	Zostera marina	Zostera marina
Alabama	AL	Abdra brachycarpa	Abdra brachycarpa
Alabama	AL	Acalypha deamii	Acalypha deamii
Alabama	AL	Acalypha gracilens	Acalypha gracilens
Alabama	AL	Acalypha ostryifolia	Acalypha ostryifolia
Alabama	AL	Acalypha rhomboidea	Acalypha rhomboidea
Alabama	AL	Acalypha virginica	Acalypha virginica
Alabama	AL	Acer floridanum	Acer floridanum
Alabama	AL	Acer leucoderme	Acer leucoderme
Alabama	AL	Acer negundo var. negundo	Acer negundo
Alabama	AL	Acer nigrum	Acer nigrum
Alabama	AL	Acer rubrum var. drummondii	Acer rubrum
Alabama	AL	Acer rubrum var. rubrum	Acer rubrum
Alabama	AL	Acer rubrum var. trilobum	Acer rubrum
Alabama	AL	Acer saccharinum	Acer saccharinum
Alabama	AL	Acer saccharum var. saccharum	Acer saccharum
Alabama	AL	Achillea millefolium	Achillea millefolium
Alabama	AL	Acmella repens	Acmella repens
Alabama	AL	Aconitum uncinatum ssp. uncinatum	Aconitum uncinatum
Alabama	AL	Actaea pachypoda	Actaea pachypoda
Alabama	AL	Actaea racemosa	Actaea racemosa
Alabama	AL	Actaea rubifolia	Actaea rubifolia
Alabama	AL	Adiantum capillus-veneris	Adiantum capillus-veneris
Alabama	AL	Adiantum pedatum	Adiantum pedatum
Alabama	AL	Aeschynomene viscidula	Aeschynomene viscidula
Alabama	AL	Aesculus flava	Aesculus flava
Alabama	AL	Aesculus glabra var. glabra	Aesculus glabra
Alabama	AL	Aesculus parviflora	Aesculus parviflora
Alabama	AL	Aesculus pavia var. pavia	Aesculus pavia
Alabama	AL	Aesculus sylvatica	Aesculus sylvatica
Alabama	AL	Aesculus X bushii	Aesculus bushii
Alabama	AL	Aesculus X marylandica	Aesculus marylandica
Alabama	AL	Aesculus X mutabilis	Aesculus mutabilis
Alabama	AL	Aesculus X neglecta	Aesculus neglecta
Alabama	AL	Agalinis aphylla	Agalinis aphylla
Alabama	AL	Agalinis auriculata	Agalinis auriculata
Alabama	AL	Agalinis decemloba	Agalinis decemloba
Alabama	AL	Agalinis divaricata	Agalinis divaricata
Alabama	AL	Agalinis fasciculata var. fasciculata	Agalinis fasciculata
Alabama	AL	Agalinis filicaulis	Agalinis filicaulis
Alabama	AL	Agalinis filifolia	Agalinis filifolia
Alabama	AL	Agalinis gattingeri	Agalinis gattingeri
Alabama	AL	Agalinis georgiana	Agalinis georgiana
Alabama	AL	Agalinis harperi	Agalinis harperi
Alabama	AL	Agalinis heterophylla	Agalinis heterophylla
Alabama	AL	Agalinis linifolia	Agalinis linifolia
Alabama	AL	Agalinis maritima var. grandiflora	Agalinis maritima
Alabama	AL	Agalinis obtusifolia	Agalinis obtusifolia
Alabama	AL	Agalinis oligophylla	Agalinis oligophylla
Alabama	AL	Agalinis plukenetii	Agalinis plukenetii
Alabama	AL	Agalinis pulchella	Agalinis pulchella
Alabama	AL	Agalinis purpurea var. purpurea	Agalinis purpurea
Alabama	AL	Agalinis setacea	Agalinis setacea
Alabama	AL	Agalinis tenella	Agalinis tenella
Alabama	AL	Agalinis tenuifolia	Agalinis tenuifolia
Alabama	AL	Agalinis viridis	Agalinis viridis
Alabama	AL	Agastache nepetoides	Agastache nepetoides
Alabama	AL	Ageratina altissima var. altissima	Ageratina altissima
Alabama	AL	Ageratina altissima var. roanensis	Ageratina altissima
Alabama	AL	Ageratina aromatica	Ageratina aromatica
Alabama	AL	Agrimonia gryposepala	Agrimonia gryposepala
Alabama	AL	Agrimonia incisa	Agrimonia incisa
Alabama	AL	Agrimonia microcarpa	Agrimonia microcarpa
Alabama	AL	Agrimonia parviflora	Agrimonia parviflora
Alabama	AL	Agrimonia pubescens	Agrimonia pubescens
Alabama	AL	Agrimonia rostellata	Agrimonia rostellata
Alabama	AL	Agrostis elliottiana	Agrostis elliottiana
Alabama	AL	Agrostis hyemalis	Agrostis hyemalis
Alabama	AL	Agrostis perennans	Agrostis perennans
Alabama	AL	Agrostis scabra	Agrostis scabra
Alabama	AL	Aletris aurea	Aletris aurea
Alabama	AL	Aletris farinosa	Aletris farinosa
Alabama	AL	Aletris lutea	Aletris lutea
Alabama	AL	Aletris obovata	Aletris obovata
Alabama	AL	Alisma subcordatum	Alisma subcordatum
Alabama	AL	Allium canadense var. canadense	Allium canadense
Alabama	AL	Allium canadense var. mobilense	Allium canadense
Alabama	AL	Allium cernuum	Allium cernuum
Alabama	AL	Allium cuthbertii	Allium cuthbertii
Alabama	AL	Allium speculae	Allium speculae
Alabama	AL	Allium tricoccum var. burdickii	Allium tricoccum
Alabama	AL	Allium tricoccum var. tricoccum	Allium tricoccum
Alabama	AL	Alnus serrulata	Alnus serrulata
Alabama	AL	Alopecurus carolinianus	Alopecurus carolinianus
Alabama	AL	Amaranthus australis	Amaranthus australis
Alabama	AL	Amaranthus tuberculatus	Amaranthus tuberculatus
Alabama	AL	Ambrosia artemisiifolia	Ambrosia artemisiifolia
Alabama	AL	Ambrosia bidentata	Ambrosia bidentata
Alabama	AL	Ambrosia trifida	Ambrosia trifida
Alabama	AL	Amelanchier arborea	Amelanchier arborea
Alabama	AL	Amelanchier canadensis var. canadensis	Amelanchier canadensis
Alabama	AL	Amelanchier laevis	Amelanchier laevis
Alabama	AL	Amelanchier sanguinea	Amelanchier sanguinea
Alabama	AL	Amelanchier spicata	Amelanchier spicata
Alabama	AL	Amianthium muscaetoxicum	Amianthium muscaetoxicum
Alabama	AL	Ammannia coccinea	Ammannia coccinea
Alabama	AL	Ammannia latifolia	Ammannia latifolia
Alabama	AL	Amorpha fruticosa	Amorpha fruticosa
Alabama	AL	Amorpha glabra	Amorpha glabra
Alabama	AL	Amorpha nitens	Amorpha nitens
Alabama	AL	Amorpha schwerinii	Amorpha schwerinii
Alabama	AL	Ampelaster carolinianus	Ampelaster carolinianus
Alabama	AL	Ampelopsis cordata	Ampelopsis cordata
Alabama	AL	Amphiachyris dracunculoides	Amphiachyris dracunculoides
Alabama	AL	Amphicarpaea bracteata var. bracteata	Amphicarpaea bracteata
Alabama	AL	Amphicarpaea bracteata var. comosa	Amphicarpaea bracteata
Alabama	AL	Amphicarpum muehlenbergianum	Amphicarpum muehlenbergianum
Alabama	AL	Amsonia ciliata	Amsonia ciliata
Alabama	AL	Amsonia illustris	Amsonia illustris
Alabama	AL	Amsonia rigida	Amsonia rigida
Alabama	AL	Amsonia tabernaemontana var. tabernaemontana	Amsonia tabernaemontana
Alabama	AL	Anchistea virginica	Anchistea virginica
Alabama	AL	Andersonglossum virginianum	Andersonglossum virginianum
Alabama	AL	Andropogon arctatus	Andropogon arctatus
Alabama	AL	Andropogon brachystachyus	Andropogon brachystachyus
Alabama	AL	Andropogon cretaceus	Andropogon cretaceus
Alabama	AL	Andropogon dealbatus	Andropogon dealbatus
Alabama	AL	Andropogon gerardi	Andropogon gerardi
Alabama	AL	Andropogon glomeratus var. glomeratus	Andropogon glomeratus
Alabama	AL	Andropogon glomeratus var. pumilus	Andropogon glomeratus
Alabama	AL	Andropogon gyrans var. gyrans	Andropogon gyrans
Alabama	AL	Andropogon gyrans var. stenophyllus	Andropogon gyrans
Alabama	AL	Andropogon hirsutior	Andropogon hirsutior
Alabama	AL	Andropogon longiberbis	Andropogon longiberbis
Alabama	AL	Andropogon mohrii	Andropogon mohrii
Alabama	AL	Andropogon ternarius	Andropogon ternarius
Alabama	AL	Andropogon tracyi	Andropogon tracyi
Alabama	AL	Andropogon virginicus var. virginicus	Andropogon virginicus
Alabama	AL	Anemone berlandieri	Anemone berlandieri
Alabama	AL	Anemone caroliniana	Anemone caroliniana
Alabama	AL	Anemone quinquefolia var. quinquefolia	Anemone quinquefolia
Alabama	AL	Anemone virginiana var. virginiana	Anemone virginiana
Alabama	AL	Angelica venenosa	Angelica venenosa
Alabama	AL	Antennaria parlinii	Antennaria parlinii
Alabama	AL	Antennaria plantaginifolia	Antennaria plantaginifolia
Alabama	AL	Antennaria solitaria	Antennaria solitaria
Alabama	AL	Anthenantia rufa	Anthenantia rufa
Alabama	AL	Anthenantia villosa var. villosa	Anthenantia villosa
Alabama	AL	Aphyllon uniflorum	Aphyllon uniflorum
Alabama	AL	Apios americana	Apios americana
Alabama	AL	Apios priceana	Apios priceana
Alabama	AL	Aplectrum hyemale	Aplectrum hyemale
Alabama	AL	Apocynum androsaemifolium	Apocynum androsaemifolium
Alabama	AL	Apocynum cannabinum	Apocynum cannabinum
Alabama	AL	Apteria aphylla	Apteria aphylla
Alabama	AL	Aquilegia canadensis	Aquilegia canadensis
Alabama	AL	Arabis georgiana	Arabis georgiana
Alabama	AL	Arabis patens	Arabis patens
Alabama	AL	Aralia racemosa	Aralia racemosa
Alabama	AL	Aralia spinosa	Aralia spinosa
Alabama	AL	Arenaria lanuginosa ssp. lanuginosa var. lanuginosa	Arenaria lanuginosa
Alabama	AL	Arisaema dracontium	Arisaema dracontium
Alabama	AL	Arisaema triphyllum ssp. pusillum	Arisaema triphyllum
Alabama	AL	Arisaema triphyllum ssp. triphyllum	Arisaema triphyllum
Alabama	AL	Aristida beyrichiana	Aristida beyrichiana
Alabama	AL	Aristida condensata	Aristida condensata
Alabama	AL	Aristida curtissii	Aristida curtissii
Alabama	AL	Aristida dichotoma	Aristida dichotoma
Alabama	AL	Aristida lanosa	Aristida lanosa
Alabama	AL	Aristida longespica var. geniculata	Aristida longespica
Alabama	AL	Aristida longespica var. longespica	Aristida longespica
Alabama	AL	Aristida mohrii	Aristida mohrii
Alabama	AL	Aristida oligantha	Aristida oligantha
Alabama	AL	Aristida palustris	Aristida palustris
Alabama	AL	Aristida purpurascens var. purpurascens	Aristida purpurascens
Alabama	AL	Aristida purpurascens var. tenuispica	Aristida purpurascens
Alabama	AL	Aristida purpurascens var. virgata	Aristida purpurascens
Alabama	AL	Aristida simpliciflora	Aristida simpliciflora
Alabama	AL	Aristida spiciformis	Aristida spiciformis
Alabama	AL	Aristida tuberculosa	Aristida tuberculosa
Alabama	AL	Arnica acaulis	Arnica acaulis
Alabama	AL	Arnoglossum atriplicifolium	Arnoglossum atriplicifolium
Alabama	AL	Arnoglossum diversifolium	Arnoglossum diversifolium
Alabama	AL	Arnoglossum ovatum	Arnoglossum ovatum
Alabama	AL	Arnoglossum plantagineum	Arnoglossum plantagineum
Alabama	AL	Arnoglossum reniforme	Arnoglossum reniforme
Alabama	AL	Arnoglossum sulcatum	Arnoglossum sulcatum
Alabama	AL	Aronia arbutifolia	Aronia arbutifolia
Alabama	AL	Aronia melanocarpa	Aronia melanocarpa
Alabama	AL	Aronia prunifolia	Aronia prunifolia
Alabama	AL	Aruncus dioicus var. dioicus	Aruncus dioicus
Alabama	AL	Arundinaria appalachiana	Arundinaria appalachiana
Alabama	AL	Arundinaria gigantea	Arundinaria gigantea
Alabama	AL	Arundinaria tecta	Arundinaria tecta
Alabama	AL	Asarum canadense	Asarum canadense
Alabama	AL	Asclepias amplexicaulis	Asclepias amplexicaulis
Alabama	AL	Asclepias cinerea	Asclepias cinerea
Alabama	AL	Asclepias connivens	Asclepias connivens
Alabama	AL	Asclepias exaltata	Asclepias exaltata
Alabama	AL	Asclepias hirtella	Asclepias hirtella
Alabama	AL	Asclepias humistrata	Asclepias humistrata
Alabama	AL	Asclepias incarnata ssp. incarnata	Asclepias incarnata
Alabama	AL	Asclepias incarnata ssp. pulchra	Asclepias incarnata
Alabama	AL	Asclepias lanceolata	Asclepias lanceolata
Alabama	AL	Asclepias longifolia	Asclepias longifolia
Alabama	AL	Asclepias michauxii	Asclepias michauxii
Alabama	AL	Asclepias obovata	Asclepias obovata
Alabama	AL	Asclepias perennis	Asclepias perennis
Alabama	AL	Asclepias quadrifolia	Asclepias quadrifolia
Alabama	AL	Asclepias rubra	Asclepias rubra
Alabama	AL	Asclepias syriaca	Asclepias syriaca
Alabama	AL	Asclepias tomentosa	Asclepias tomentosa
Alabama	AL	Asclepias tuberosa ssp. interior	Asclepias tuberosa
Alabama	AL	Asclepias tuberosa ssp. rolfsii	Asclepias tuberosa
Alabama	AL	Asclepias tuberosa ssp. tuberosa	Asclepias tuberosa
Alabama	AL	Asclepias variegata	Asclepias variegata
Alabama	AL	Asclepias verticillata	Asclepias verticillata
Alabama	AL	Asclepias viridiflora	Asclepias viridiflora
Alabama	AL	Asclepias viridis	Asclepias viridis
Alabama	AL	Asclepias viridula	Asclepias viridula
Alabama	AL	Asemeia violacea	Asemeia violacea
Alabama	AL	Asimina parviflora	Asimina parviflora
Alabama	AL	Asimina spatulata	Asimina spatulata
Alabama	AL	Asimina triloba	Asimina triloba
Alabama	AL	Asimina X piedmontana	Asimina piedmontana
Alabama	AL	Asplenium abscissum	Asplenium abscissum
Alabama	AL	Asplenium bradleyi	Asplenium bradleyi
Alabama	AL	Asplenium monanthes	Asplenium monanthes
Alabama	AL	Asplenium montanum	Asplenium montanum
Alabama	AL	Asplenium pinnatifidum	Asplenium pinnatifidum
Alabama	AL	Asplenium platyneuron	Asplenium platyneuron
Alabama	AL	Asplenium resiliens	Asplenium resiliens
Alabama	AL	Asplenium rhizophyllum	Asplenium rhizophyllum
Alabama	AL	Asplenium ruta-muraria	Asplenium ruta-muraria
Alabama	AL	Asplenium scolopendrium var. americanum	Asplenium scolopendrium
Alabama	AL	Asplenium trichomanes ssp. trichomanes	Asplenium trichomanes
Alabama	AL	Asplenium tutwilerae	Asplenium tutwilerae
Alabama	AL	Asplenium X boydstoniae	Asplenium boydstoniae
Alabama	AL	Asplenium X ebenoides	Asplenium ebenoides
Alabama	AL	Asplenium X gravesii	Asplenium gravesii
Alabama	AL	Asplenium X trudellii	Asplenium trudellii
Alabama	AL	Astilbe biternata	Astilbe biternata
Alabama	AL	Astragalus canadensis var. canadensis	Astragalus canadensis
Alabama	AL	Astragalus obcordatus	Astragalus obcordatus
Alabama	AL	Astragalus tennesseensis	Astragalus tennesseensis
Alabama	AL	Astragalus villosus	Astragalus villosus
Alabama	AL	Astranthium integrifolium	Astranthium integrifolium
Alabama	AL	Astrolepis integerrima	Astrolepis integerrima
Alabama	AL	Athyrium asplenioides	Athyrium asplenioides
Alabama	AL	Atriplex mucronata	Atriplex mucronata
Alabama	AL	Atriplex pentandra	Atriplex pentandra
Alabama	AL	Aureolaria flava var. flava	Aureolaria flava
Alabama	AL	Aureolaria flava var. macrantha	Aureolaria flava
Alabama	AL	Aureolaria laevigata	Aureolaria laevigata
Alabama	AL	Aureolaria patula	Aureolaria patula
Alabama	AL	Aureolaria pectinata	Aureolaria pectinata
Alabama	AL	Aureolaria virginica	Aureolaria virginica
Alabama	AL	Axonopus compressus	Axonopus compressus
Alabama	AL	Axonopus fissifolius	Axonopus fissifolius
Alabama	AL	Axonopus furcatus	Axonopus furcatus
Alabama	AL	Azolla cristata	Azolla cristata
Alabama	AL	Baccharis angustifolia	Baccharis angustifolia
Alabama	AL	Baccharis dioica	Baccharis dioica
Alabama	AL	Baccharis glomeruliflora	Baccharis glomeruliflora
Alabama	AL	Baccharis halimifolia	Baccharis halimifolia
Alabama	AL	Bacopa caroliniana	Bacopa caroliniana
Alabama	AL	Bacopa innominata	Bacopa innominata
Alabama	AL	Bacopa monnieri	Bacopa monnieri
Alabama	AL	Bacopa rotundifolia	Bacopa rotundifolia
Alabama	AL	Balduina angustifolia	Balduina angustifolia
Alabama	AL	Balduina atropurpurea	Balduina atropurpurea
Alabama	AL	Balduina uniflora	Balduina uniflora
Alabama	AL	Baptisia aberrans	Baptisia aberrans
Alabama	AL	Baptisia alba var. alba	Baptisia alba
Alabama	AL	Baptisia alba var. macrophylla	Baptisia alba
Alabama	AL	Baptisia albescens	Baptisia albescens
Alabama	AL	Baptisia bracteata var. bracteata	Baptisia bracteata
Alabama	AL	Baptisia calycosa var. villosa	Baptisia calycosa
Alabama	AL	Baptisia lanceolata var. elliptica	Baptisia lanceolata
Alabama	AL	Baptisia megacarpa	Baptisia megacarpa
Alabama	AL	Baptisia perfoliata	Baptisia perfoliata
Alabama	AL	Bartonia paniculata ssp. paniculata	Bartonia paniculata
Alabama	AL	Bartonia verna	Bartonia verna
Alabama	AL	Bartonia virginica	Bartonia virginica
Alabama	AL	Batis maritima	Batis maritima
Alabama	AL	Bejaria racemosa	Bejaria racemosa
Alabama	AL	Berberis canadensis	Berberis canadensis
Alabama	AL	Berchemia scandens	Berchemia scandens
Alabama	AL	Berlandiera pumila	Berlandiera pumila
Alabama	AL	Betula lenta	Betula lenta
Alabama	AL	Betula nigra	Betula nigra
Alabama	AL	Bidens aristosa	Bidens aristosa
Alabama	AL	Bidens bipinnata	Bidens bipinnata
Alabama	AL	Bidens cernua	Bidens cernua
Alabama	AL	Bidens discoidea	Bidens discoidea
Alabama	AL	Bidens frondosa	Bidens frondosa
Alabama	AL	Bidens laevis	Bidens laevis
Alabama	AL	Bidens mitis	Bidens mitis
Alabama	AL	Bidens trichosperma	Bidens trichosperma
Alabama	AL	Bidens tripartita	Bidens tripartita
Alabama	AL	Bidens vulgata	Bidens vulgata
Alabama	AL	Bigelowia nudata ssp. nudata	Bigelowia nudata
Alabama	AL	Bigelowia nuttallii	Bigelowia nuttallii
Alabama	AL	Bignonia capreolata	Bignonia capreolata
Alabama	AL	Blephilia ciliata	Blephilia ciliata
Alabama	AL	Blephilia hirsuta var. hirsuta	Blephilia hirsuta
Alabama	AL	Blephilia subnuda	Blephilia subnuda
Alabama	AL	Boehmeria cylindrica	Boehmeria cylindrica
Alabama	AL	Boerhavia diffusa	Boerhavia diffusa
Alabama	AL	Boerhavia erecta	Boerhavia erecta
Alabama	AL	Boltonia asteroides var. glastifolia	Boltonia asteroides
Alabama	AL	Boltonia diffusa	Boltonia diffusa
Alabama	AL	Borodinia canadensis	Borodinia canadensis
Alabama	AL	Borodinia laevigata	Borodinia laevigata
Alabama	AL	Borrichia frutescens	Borrichia frutescens
Alabama	AL	Botrypus virginianus	Botrypus virginianus
Alabama	AL	Bouteloua curtipendula var. curtipendula	Bouteloua curtipendula
Alabama	AL	Boykinia aconitifolia	Boykinia aconitifolia
Alabama	AL	Brachyelytrum erectum	Brachyelytrum erectum
Alabama	AL	Bradburia pilosa	Bradburia pilosa
Alabama	AL	Brasenia schreberi	Brasenia schreberi
Alabama	AL	Brickellia cordifolia	Brickellia cordifolia
Alabama	AL	Brickellia eupatorioides var. eupatorioides	Brickellia eupatorioides
Alabama	AL	Brintonia discoidea	Brintonia discoidea
Alabama	AL	Bromus nottowayanus	Bromus nottowayanus
Alabama	AL	Bromus pubescens	Bromus pubescens
Alabama	AL	Brunnichia ovata	Brunnichia ovata
Alabama	AL	Buchnera americana	Buchnera americana
Alabama	AL	Buchnera floridana	Buchnera floridana
Alabama	AL	Bulbostylis capillaris ssp. capillaris	Bulbostylis capillaris
Alabama	AL	Bulbostylis ciliatifolia var. ciliatifolia	Bulbostylis ciliatifolia
Alabama	AL	Bulbostylis ciliatifolia var. coarctata	Bulbostylis ciliatifolia
Alabama	AL	Bulbostylis warei	Bulbostylis warei
Alabama	AL	Burmannia biflora	Burmannia biflora
Alabama	AL	Burmannia capitata	Burmannia capitata
Alabama	AL	Cabomba caroliniana	Cabomba caroliniana
Alabama	AL	Cakile constricta	Cakile constricta
Alabama	AL	Cakile edentula ssp. harperi	Cakile edentula
Alabama	AL	Cakile geniculata	Cakile geniculata
Alabama	AL	Cakile lanceolata ssp. pseudoconstricta	Cakile lanceolata
Alabama	AL	Calamagrostis coarctata	Calamagrostis coarctata
Alabama	AL	Callicarpa americana	Callicarpa americana
Alabama	AL	Calliphysalis carpenteri	Calliphysalis carpenteri
Alabama	AL	Callirhoe alcaeoides	Callirhoe alcaeoides
Alabama	AL	Callirhoe papaver	Callirhoe papaver
Alabama	AL	Callirhoe triangulata	Callirhoe triangulata
Alabama	AL	Callisia rosea	Callisia rosea
Alabama	AL	Callitriche heterophylla ssp. heterophylla	Callitriche heterophylla
Alabama	AL	Callitriche pedunculosa	Callitriche pedunculosa
Alabama	AL	Callitriche peploides	Callitriche peploides
Alabama	AL	Callitriche terrestris	Callitriche terrestris
Alabama	AL	Calopogon barbatus	Calopogon barbatus
Alabama	AL	Calopogon multiflorus	Calopogon multiflorus
Alabama	AL	Calopogon oklahomensis	Calopogon oklahomensis
Alabama	AL	Calopogon pallidus	Calopogon pallidus
Alabama	AL	Calopogon tuberosus var. tuberosus	Calopogon tuberosus
Alabama	AL	Calycanthus floridus	Calycanthus floridus
Alabama	AL	Calycocarpum lyonii	Calycocarpum lyonii
Alabama	AL	Calystegia catesbeiana ssp. catesbeiana	Calystegia catesbeiana
Alabama	AL	Calystegia sepium ssp. limnophila	Calystegia sepium
Alabama	AL	Calystegia silvatica ssp. fraterniflora	Calystegia silvatica
Alabama	AL	Camassia scilloides	Camassia scilloides
Alabama	AL	Campanula divaricata	Campanula divaricata
Alabama	AL	Campanula floridana	Campanula floridana
Alabama	AL	Campanulastrum americanum	Campanulastrum americanum
Alabama	AL	Campsis radicans	Campsis radicans
Alabama	AL	Canna flaccida	Canna flaccida
Alabama	AL	Cardamine angustata	Cardamine angustata
Alabama	AL	Cardamine bulbosa	Cardamine bulbosa
Alabama	AL	Cardamine concatenata	Cardamine concatenata
Alabama	AL	Cardamine diphylla	Cardamine diphylla
Alabama	AL	Cardamine dissecta	Cardamine dissecta
Alabama	AL	Cardamine douglassii	Cardamine douglassii
Alabama	AL	Cardamine parviflora	Cardamine parviflora
Alabama	AL	Cardamine pensylvanica	Cardamine pensylvanica
Alabama	AL	Cardiospermum halicacabum	Cardiospermum halicacabum
Alabama	AL	Carex abscondita	Carex abscondita
Alabama	AL	Carex acidicola	Carex acidicola
Alabama	AL	Carex alata	Carex alata
Alabama	AL	Carex albicans var. albicans	Carex albicans
Alabama	AL	Carex albicans var. australis	Carex albicans
Alabama	AL	Carex albolutescens	Carex albolutescens
Alabama	AL	Carex albursina	Carex albursina
Alabama	AL	Carex amphibola	Carex amphibola
Alabama	AL	Carex annectens	Carex annectens
Alabama	AL	Carex appalachica	Carex appalachica
Alabama	AL	Carex atlantica ssp. atlantica	Carex atlantica
Alabama	AL	Carex atlantica ssp. capillacea	Carex atlantica
Alabama	AL	Carex aureolensis	Carex aureolensis
Alabama	AL	Carex austrina	Carex austrina
Alabama	AL	Carex austrocaroliniana	Carex austrocaroliniana
Alabama	AL	Carex austrodeflexa	Carex austrodeflexa
Alabama	AL	Carex austrolucorum	Carex austrolucorum
Alabama	AL	Carex baileyi	Carex baileyi
Alabama	AL	Carex baltzellii	Carex baltzellii
Alabama	AL	Carex barrattii	Carex barrattii
Alabama	AL	Carex basiantha	Carex basiantha
Alabama	AL	Carex blanda	Carex blanda
Alabama	AL	Carex brevior	Carex brevior
Alabama	AL	Carex bromoides ssp. bromoides	Carex bromoides
Alabama	AL	Carex brysonii	Carex brysonii
Alabama	AL	Carex bullata var. greenii	Carex bullata
Alabama	AL	Carex bushii	Carex bushii
Alabama	AL	Carex calcifugens	Carex calcifugens
Alabama	AL	Carex careyana	Carex careyana
Alabama	AL	Carex caroliniana	Carex caroliniana
Alabama	AL	Carex cephalophora	Carex cephalophora
Alabama	AL	Carex cherokeensis	Carex cherokeensis
Alabama	AL	Carex collinsii	Carex collinsii
Alabama	AL	Carex communis var. communis	Carex communis
Alabama	AL	Carex comosa	Carex comosa
Alabama	AL	Carex complanata	Carex complanata
Alabama	AL	Carex conjuncta	Carex conjuncta
Alabama	AL	Carex corrugata	Carex corrugata
Alabama	AL	Carex crawei	Carex crawei
Alabama	AL	Carex crebriflora	Carex crebriflora
Alabama	AL	Carex crinita var. brevicrinis	Carex crinita
Alabama	AL	Carex crinita var. crinita	Carex crinita
Alabama	AL	Carex cristatella	Carex cristatella
Alabama	AL	Carex crus-corvi	Carex crus-corvi
Alabama	AL	Carex cumberlandensis	Carex cumberlandensis
Alabama	AL	Carex dasycarpa	Carex dasycarpa
[truncated: 125,965 more rows]
