# Supplementary material for: Species clustering, climate effects, and introduced species in 5 million city trees across 63 US cities
Source: eLife. 2022 Sep 27;11:e77891. doi: 10.7554/eLife.77891 (PMC9578703; doi:10.7554/eLife.77891)
Supplement: Figure 4—source data 2. — This file includes all loadings and scores for the environmental principal components analysis (PCA) (see Figure 3A). [file elife-77891-fig4-data2.xlsx]

## Sheet: Environmental_PCA_Scores
	Comp.1	Comp.2	Comp.3	Comp.4	Comp.5	Comp.6	Comp.7	Comp.8	Comp.9	Comp.10	Comp.11	Comp.12	Comp.13	Comp.14	Comp.15	Comp.16	Comp.17	Comp.18	Comp.19	filename_city
Albuquerque	0.428139	-4.04168	-2.14596	-0.279924	0.0113712	0.966433	-0.170234	-0.193047	-0.119274	-0.0677033	0.0496204	0.0716212	-0.0476208	0.0522511	0.0438811	-0.0715627	0.0132649	-0.00478982	1.37128e-14	Albuquerque
Anaheim	4.32239	-1.35809	0.38176	0.0563384	-0.374172	0.236374	-0.289196	-0.0395325	0.169667	0.0607647	-0.0750147	0.0704397	-0.0349065	-0.0474163	-0.0131978	0.0285	0.00562362	0.0102779	-1.04504e-15	Anaheim
Arlington	-0.250539	0.763047	-2.35687	0.0961406	-0.116571	-0.495858	0.638857	-0.479506	0.0187381	-0.113909	-0.25463	0.00395936	-0.0738983	0.0304009	0.00539351	0.000339081	-0.00996405	-0.00410157	-2.95687e-15	Arlington
Atlanta	-1.21126	2.63983	0.304383	2.12055	0.524305	-0.130182	-0.354766	-0.337568	0.0424193	0.236618	0.0904828	0.193112	-6.49598e-05	0.0139632	-0.0345657	-0.068463	0.0185679	-0.00732127	1.40416e-14	Atlanta
AuroraCO	-0.639621	-3.66969	-0.418228	-0.680052	0.471233	0.646941	-0.491653	-0.251479	-0.262382	-0.266865	0.0361297	-0.00136823	0.00847723	-0.0353219	-0.00415229	0.0745651	0.0216948	-0.0114022	2.66534e-15	AuroraCO
Austin	0.645957	0.794174	-2.5498	0.15166	-0.564087	-0.306823	0.598973	-0.321636	-0.0558671	-0.10828	-0.0258829	0.0924651	-0.0475223	-0.122443	0.0822717	0.0124778	-0.063465	-0.00449857	-1.73612e-14	Austin
Baltimore	-2.54288	0.890522	-0.934992	0.337098	-0.666621	0.733362	0.390149	-0.0245237	0.245191	0.0372632	0.0642766	-0.177434	0.0267632	0.0570639	0.0214586	0.0210453	0.0433709	0.00375289	8.6368e-15	Baltimore
Boston	-2.57298	0.567279	2.01243	2.36128	-0.0766199	-0.899945	-0.782214	0.22369	-0.111641	-0.135093	-0.26043	-0.0786745	-0.0395397	0.060868	0.0586904	0.069392	0.0131392	0.00189745	3.81702e-16	Boston
Buffalo	-3.26185	-0.439154	1.74509	0.0112309	-1.10282	0.15172	0.09577	-0.0685661	-0.00115722	-0.0431205	0.125757	-0.013242	0.00979542	0.0767093	0.0258563	-0.0269679	0.0219863	-0.00608629	1.03781e-14	Buffalo
CapeCoral	1.83877	5.52084	-1.85406	-2.47494	1.98369	-0.139033	-1.31435	0.0521805	-0.0716888	0.12833	0.0972094	-0.211454	-0.172966	-0.00877856	-0.0236854	-0.0302743	-0.00438823	-0.00012404	2.6092e-15	CapeCoral
ColoradoSprings	-0.521354	-3.79757	-0.105374	-1.10471	0.907368	1.12292	-0.863551	-0.0885581	-0.115244	-0.270409	0.0337401	-0.00890474	0.0427357	-0.0878655	-0.00508363	0.0338303	0.0229652	-0.00361096	6.62893e-15	ColoradoSprings
Columbus	-2.64278	-0.40116	0.251883	-0.34452	-0.23034	0.386296	-0.0120792	-0.0504898	-0.0407148	0.0286872	0.0926079	-0.0401801	-0.059957	-0.0417366	-0.00604574	-0.0516379	-0.0280614	0.0058406	-5.01078e-15	Columbus
Dallas	-0.333159	0.971858	-2.38695	0.131286	-0.0677743	-0.546134	0.732208	-0.474896	0.0761988	-0.161783	-0.248274	-0.00116273	-0.103677	-0.0184585	0.0297125	-0.00204209	-0.0019649	0.00303192	-8.47024e-18	Dallas
Denver	-0.624288	-3.67756	-0.502627	-0.595451	0.343309	0.661018	-0.430283	-0.260388	-0.347458	-0.262843	0.0127821	0.0665462	0.000939736	-0.0353009	-0.0190515	0.0615001	0.0309535	-0.00112619	5.45185e-15	Denver
DesMoines	-2.94834	-1.75187	-0.108299	-1.69844	1.0106	-0.616973	0.0849137	0.114404	0.0981902	0.223049	-0.0988739	0.0561649	0.0690708	0.0148722	-0.0509522	-0.0168405	0.00204499	0.00762828	-1.66033e-15	DesMoines
Detroit	-2.80851	-1.01286	0.769163	-0.855636	-1.11246	-0.197072	0.377747	0.310075	-0.10686	-0.033738	0.111866	-0.0514505	-0.00552105	0.0673466	0.0784904	-0.0187065	0.0317956	0.00118175	1.25018e-14	Detroit
Durham	-1.69194	1.52921	-0.957997	0.805402	-0.259858	1.31513	-0.0732791	0.266295	0.0930653	-0.0854456	-0.0937566	-0.0359398	-0.0204399	0.0661781	-0.0672272	-0.00583604	-0.0291981	0.0046455	-1.13775e-14	Durham
Fresno	2.98135	-2.83382	-1.66831	1.45318	0.584764	-0.78433	-0.0400971	0.2082	0.319381	-0.0557032	0.175808	-0.281962	0.0889579	-0.052612	0.0320253	-0.0356234	-0.0101508	-0.000302885	-1.57423e-15	Fresno
GardenGrove	4.41222	-1.36266	0.803834	-0.230273	-0.869858	0.14805	-0.383251	-0.0171955	0.150366	0.0586473	-0.106468	0.0923361	-0.0329984	-0.0361241	-0.00909981	-0.00166281	0.00520348	0.00381944	3.22137e-15	GardenGrove
GrandRapids	-2.79193	-1.28729	0.99202	-0.781679	-0.321281	0.145242	0.136042	0.13461	-0.247205	-0.0934931	0.0843354	0.0254638	0.157085	-0.142841	0.0900133	-0.0648509	0.0101878	0.00184847	1.1467e-14	GrandRapids
Greensboro	-1.74084	1.4958	-0.74076	0.632601	-0.503976	1.0927	-0.0267898	0.300364	0.0453581	-0.0826385	-0.10149	-0.0312792	-0.00773653	0.023763	0.00146925	0.0043949	-0.00531284	0.010731	-3.62396e-15	Greensboro
Honolulu	4.72673	3.92402	-0.00135139	-0.164999	-1.8164	0.642751	0.379082	-0.219937	-0.781296	0.664493	-0.227944	-0.30414	0.139523	-0.0935705	0.0285791	0.0325533	0.00893316	-0.00517897	-5.26902e-15	Honolulu
Houston	-0.00719098	3.18591	-1.78062	0.076299	-1.1683	-0.143838	0.35766	0.244807	0.0958517	-0.179403	0.07365	0.0258598	-0.0012767	0.0641036	-0.0651178	0.0453577	-0.0365354	-0.000381618	-1.76939e-14	Houston
HuntingtonBeach	4.41968	-1.29016	1.39186	-0.530063	-1.2887	-0.0156913	-0.399961	0.0234206	0.203284	0.0387355	-0.0992676	0.0871572	-0.0428094	-0.024646	0.00132505	-0.0229987	0.0155269	-0.000931753	9.82993e-15	HuntingtonBeach
Indianapolis	-2.9264	-0.0928516	0.0957469	-0.377831	-0.0974005	0.243256	0.169074	-0.0896935	0.0570528	0.0657701	-0.060113	-0.0190432	0.0158025	0.0390291	0.0307082	-0.0487885	0.0119871	0.0122961	6.16917e-15	Indianapolis
Irvine	4.40287	-1.48295	0.957232	-0.228732	-0.814812	0.277922	-0.503552	-0.0264071	0.217975	0.105861	-0.136108	0.063739	-0.0570548	-0.0603879	-0.017036	-0.0101624	0.00748933	-0.00536392	6.32775e-15	Irvine
Jerseycity	-3.02338	1.17497	0.376918	-0.0475089	-1.28543	0.168631	0.448597	0.0683621	0.306869	-0.0451088	0.073689	-0.152738	0.000632994	0.0253115	-0.0137777	0.00331307	0.0409935	-0.00982561	1.18872e-14	Jerseycity
Knoxville	-1.58535	1.88189	0.597456	2.41676	0.565079	-0.3181	-0.69109	0.077921	-0.0426528	0.160118	0.00743915	0.251598	0.139193	0.0079469	-0.0592718	-0.0376724	0.0120119	-0.00243858	8.0371e-15	Knoxville
LasVegas	1.94061	-3.86992	-3.84523	2.03604	-0.650797	-1.54892	-0.167299	-0.0116459	-0.627539	0.24784	0.357353	0.149161	-0.10014	0.104885	0.00316742	0.0432665	0.0006119	0.0128219	-5.7899e-15	LasVegas
LosAngeles	4.47362	-0.457109	0.680456	-0.164114	-0.0993323	-0.0325559	0.211608	0.0074479	0.418651	0.148464	-0.0550026	-0.0251429	-0.11698	0.0144267	0.0321441	0.00213865	0.0417996	-0.00516275	1.50776e-14	LosAngeles
Louisville	-1.87268	0.961023	-0.0334477	1.54298	0.249168	-0.296183	-0.457599	0.564574	-0.0841021	-0.0862935	-0.306067	-0.0440704	-0.044102	-0.0778713	0.0683201	-0.0555682	0.0014796	0.000514495	9.90288e-15	Louisville
Madison	-3.2113	-2.21705	0.600394	-1.57031	0.445379	-0.158232	0.026734	0.261311	-0.0239581	0.162785	-0.0102464	-0.0171302	0.00652528	-0.0771221	-0.0518965	0.0172903	-0.049168	0.0041944	-1.97616e-14	Madison
Miami	2.31988	5.34209	-1.0958	-2.08699	-0.958971	-1.07152	-0.33009	-0.154991	-0.148404	-0.444753	-0.0427162	-0.00537304	0.296573	0.013227	-0.0799597	-0.0110493	0.0433613	0.00665823	1.15557e-14	Miami
Milwaukee	-3.00753	-1.6476	1.03858	-1.4827	-0.607626	-0.433654	0.243277	0.332664	-0.0746438	0.0671865	0.0775753	0.0306454	-0.0214761	-0.0637915	0.0121729	0.0346899	-0.00860573	0.00360659	-6.0972e-15	Milwaukee
Minneapolis	-3.5778	-2.60377	0.52973	-2.06279	0.868561	-0.587155	0.148152	0.326532	0.228725	0.350785	-0.181814	-0.0625392	-0.0182912	0.0736647	0.0450254	0.0644871	-0.00747316	-0.00899335	-8.22365e-15	Minneapolis
Nashville	-1.51348	1.56657	-0.346933	1.94823	0.540546	0.182622	-0.0576951	0.528648	-0.0354241	0.0246937	-0.247174	0.0909648	0.0675764	-0.0522201	-0.016496	0.00487011	-0.00626446	-0.00139211	-1.55053e-15	Nashville
NewOrleans	-0.791506	5.13633	-1.23157	0.478766	-0.123039	0.65274	0.409702	0.468391	0.387165	0.0596703	0.300017	0.311037	0.0897956	-0.187316	0.0415382	0.0887796	0.00156935	-0.00527437	-3.10906e-15	NewOrleans
NewYork	-2.92316	1.03241	0.972207	0.764315	-1.11306	-0.747282	-0.056077	-0.543878	0.26052	0.177031	0.362942	-0.0351347	-0.0256797	-0.00504623	-0.0545851	-0.00910507	0.0219918	-0.00609422	6.44427e-15	NewYork
Oakland	3.65719	0.0331815	3.68192	-0.86394	-0.680119	-0.146625	0.316094	0.0213509	0.0159678	-0.11818	-0.0215166	0.0974276	-0.000780922	0.105674	0.010654	0.0150955	-0.0674212	-0.00460943	-2.15126e-14	Oakland
OklahomaCity	-0.818372	-0.227094	-1.67263	-0.801438	0.798292	-0.822116	0.328314	-0.463051	-0.0456404	-0.0701528	-0.183575	0.119541	0.0774687	-0.00933713	-0.000910259	-0.0301179	0.0381981	0.00102344	1.47186e-14	OklahomaCity
Ontario	3.93634	-1.39458	-0.812758	0.931672	0.882465	0.366501	-0.0303534	-0.0835572	0.187619	0.0474303	0.0538209	-0.0635709	-0.00413798	-0.0500631	-0.0344733	0.0386144	0.0277841	0.0133168	1.89142e-15	Ontario
Orlando	1.16341	4.54408	-1.75426	-1.51512	1.04394	0.213143	-0.81845	0.0461619	-0.101404	0.0124802	0.131805	-0.0397563	-0.0466831	0.118313	-0.0386621	0.0330549	-0.0314859	-0.00514075	-1.29613e-14	Orlando
OverlandPark	-2.17836	-0.30886	-0.690646	-1.61841	0.770609	-0.817821	0.173933	0.0655115	0.0987505	0.0744988	-0.0514813	-0.0128655	0.0366028	-0.0320609	-0.167283	-0.0178245	-0.00105524	-0.00549747	-3.11775e-15	OverlandPark
Phoenix	2.82401	-2.68443	-5.46587	0.865587	-0.415901	0.484763	0.597546	0.789182	-0.301673	-0.00264697	-0.0333653	0.0888671	-0.023953	0.0856616	-0.0666083	-0.0329238	0.00822343	-0.0127208	5.30545e-15	Phoenix
Pittsburgh	-2.63069	-0.485515	0.438367	-0.0923956	-0.184216	0.764781	-0.227036	-0.146837	-0.11715	-0.041525	0.0708195	-0.0463564	-0.0352106	-0.0162204	-0.0254138	-0.0266817	-0.054655	0.00901138	-1.68921e-14	Pittsburgh
Plano	-0.677104	1.14698	-2.04718	0.0442285	0.259554	-0.399079	0.652639	-0.619868	0.0736802	-0.216345	-0.297076	0.0137651	-0.054427	-0.0287913	0.0182008	0.0240544	-0.0250465	-0.00102138	-9.6428e-15	Plano
Portland	0.919973	1.63845	3.65712	0.75339	1.80613	-0.275983	1.01735	0.161434	-0.336992	-0.121546	0.149784	-0.0629822	-0.129014	-0.119652	-0.0251794	-0.00958362	0.0367639	0.00857036	1.08771e-14	Portland
Providence	-2.68701	0.880105	2.16808	2.39952	0.0620273	-0.688986	-0.877225	0.188819	-0.0677839	-0.128322	-0.292958	-0.082786	-0.0215589	0.0474203	0.0122945	0.0372131	0.00512279	-0.00328981	5.03553e-16	Providence
RanchoCucamonga	3.82912	-1.16843	-0.821575	1.02779	1.20841	0.296908	0.189371	-0.0636545	0.230171	0.0521962	0.081118	-0.094432	-0.02685	-0.0259382	-0.0397985	0.040144	0.0302763	0.00147557	3.57841e-15	RanchoCucamonga
Richmond	-2.08987	1.09796	-0.851745	0.47637	-0.36755	1.13177	0.00389481	-0.164704	0.123273	-0.0332001	0.0188478	-0.0499508	-0.0434982	0.059664	-0.00184603	-0.0129641	-0.021898	0.0033899	-6.92069e-15	Richmond
Rochester	-2.80934	-1.49286	1.20159	-0.263022	-0.932431	-0.0609423	-0.061699	-0.079392	-0.247798	-0.0366673	0.173535	-0.0493299	0.0280057	0.0481325	-0.0105713	-0.0127404	-0.000909435	-0.00948689	9.98557e-16	Rochester
Sacramento	2.95375	-1.52334	-0.031041	1.10901	1.15042	-0.595322	0.368052	0.0178382	0.282488	-0.133281	0.198181	-0.190299	0.181847	0.0661708	0.0525908	0.0188124	-0.016952	0.000855121	-9.9815e-15	Sacramento
SanDiego	4.41209	-1.1695	1.62274	-0.850526	-1.94839	-0.476604	-0.376368	0.0891608	0.240324	-0.017031	-0.0942152	0.0641592	-0.125197	-0.0157706	-0.0289387	-0.0356587	0.0127346	0.00170363	9.81159e-15	SanDiego
SanFrancisco	3.6158	0.572778	4.38338	-1.17126	-0.601584	0.0816771	0.254825	0.0428395	-0.094092	-0.0441572	0.0688234	0.13315	0.102367	0.138836	0.00838522	0.0502496	-0.0194491	0.00812319	-1.23109e-14	SanFrancisco
SanJose	3.6786	-1.5615	1.43752	0.0284497	-0.311623	0.213341	-0.336493	0.00189679	-0.0338362	-0.0553475	-0.0606787	0.00624125	0.101204	-0.0101275	-0.00397485	-0.0724304	-0.0468846	-0.00143708	-7.74305e-15	SanJose
SantaRosa	3.07449	1.10657	3.0095	0.575381	3.11932	1.15829	1.12947	-0.240731	-0.155953	0.126858	-0.106108	0.124326	0.0675096	0.148488	0.0139929	-0.0211573	0.0124318	-0.00258916	3.73872e-15	SantaRosa
Seattle	0.897248	1.49511	4.51197	0.173832	0.489093	-0.579853	0.714521	0.252889	-0.332288	-0.282436	0.178354	-0.0485306	-0.233145	-0.0711666	-0.0613964	-0.0184433	-0.00284905	-0.00798303	2.77982e-15	Seattle
SiouxFalls	-3.00618	-3.40989	0.122462	-1.67674	1.044	-0.481093	0.0764647	0.0998652	0.13649	0.26144	-0.159127	0.0894596	0.0591897	0.0222747	0.0302507	0.00998552	0.00207493	0.000652512	-6.83193e-16	SiouxFalls
StLouis	-2.33587	-0.211907	-1.04657	-0.225978	-0.288416	0.0189684	0.473276	-0.0150681	0.019953	0.166719	0.0416255	0.0172909	-0.0403344	-0.0687318	-0.0385557	-0.00434319	-0.0159533	0.00446737	-7.12132e-15	StLouis
Stockton	3.03405	-2.2559	-0.374257	1.24215	0.755387	-0.399961	-0.0868054	0.00988621	0.132661	-0.0754993	0.171172	-0.185163	0.152463	-0.0229624	0.0286641	-0.0244126	-0.0620472	-0.00577461	-1.83819e-14	Stockton
Tampa	1.50002	4.51234	-1.59801	-1.88082	0.824561	-0.24906	-0.536735	0.145374	-0.0108058	-0.0209309	0.206798	0.136155	-0.0691904	0.0442602	0.224156	-0.0242246	0.0124947	0.000456492	1.49966e-14	Tampa
WashingtonDC	-2.34984	0.643489	-0.630037	0.0870072	-0.718947	0.670432	0.25167	-0.00249149	0.100522	-0.0439663	0.0585824	-0.0741876	-0.039206	0.0805796	-0.0103541	-0.00678588	0.0252249	0.00680574	5.96256e-15	WashingtonDC
Worcester	-3.80359	0.139817	2.12594	1.58678	0.0199147	0.288244	-0.749707	-0.912815	0.0663624	0.189401	0.100828	0.02592	0.0017414	-0.0297929	0.0137362	0.03009	-0.0327245	-0.000646954	-1.26403e-14	Worcester

## Sheet: Environmental PC Loadings
	Comp.1	Comp.2	Comp.3	Comp.4	Comp.5	Comp.6	Comp.7	Comp.8	Comp.9	Comp.10	Comp.11	Comp.12	Comp.13	Comp.14	Comp.15	Comp.16	Comp.17	Comp.18	Comp.19
Isothermality	0.346664	0.0508039	0.0232925	0.00271347	0.064934	0.396072	-0.21875	-0.129639	-0.218945	0.604788	-0.303906	-0.189446	0.244653	-0.0380634	0.189305	-0.0137801	0.107977	0.00181884	3.5304e-14
Temp_Seasonality	-0.329124	-0.153334	-0.113265	0.0391469	0.0910215	-0.169515	0.125748	0.131028	0.0223308	0.247412	-0.112743	-0.0355977	0.0776303	0.105521	0.127108	-0.510836	-0.00478099	-0.643288	1.48347e-13
Mean_Temp_Coldest_Quarter	0.312509	0.199894	-0.123667	0.000845068	-0.0970382	0.0339308	-0.0528381	-0.146683	-0.00140768	-0.106806	0.0713614	0.168078	-0.156625	-0.0713755	-0.126265	0.404549	0.285488	-0.690454	1.599e-13
Precip_Seasonality	0.312233	-0.122609	0.104056	-0.21356	0.264836	-0.0867887	-0.0444899	0.0269072	0.847615	0.0377924	-0.0942609	-0.0903523	0.0682344	-0.0769292	-0.000734909	-0.0404802	0.0372393	-0.011895	1.7259e-14
Min_Temp_Coldest_Month	0.30848	0.220095	-0.0661813	-0.00159021	-0.139942	-0.0254084	0.0221589	-0.0912126	-0.0410084	-0.181261	0.313625	-0.230391	0.105812	0.0233603	0.0343458	-0.420545	0.098023	0.0171745	0.661298
Mean_Temp_Driest_Quarter	0.296073	0.127965	-0.0304917	0.366176	0.0569098	-0.218468	-0.183638	0.708077	-0.100626	-0.206016	-0.335541	-0.0730725	0.00072627	0.0200874	0.0600067	0.0159147	0.0113425	0.00226105	4.33877e-15
Temp_Annual_Range	-0.28526	-0.215552	-0.169592	0.0955895	0.216395	-0.0421725	0.0593888	0.044529	0.0435821	0.153627	-0.170412	-0.0042429	0.0259652	-0.0454891	0.0377117	0.495635	-0.087077	-0.00370052	0.684233
Precip_Driest_Month	-0.261537	0.243934	-0.0335157	0.260884	-0.231354	0.18178	-0.218572	-0.203241	0.274366	-0.0870231	-0.278158	-0.385625	-0.113468	0.488594	-0.254835	0.0242168	-0.0250096	-0.0241173	-1.8757e-14
Precip_Driest_Quarter	-0.259409	0.258545	-0.036807	0.248272	-0.21222	0.158065	-0.137419	-0.0987188	0.250784	-0.128256	-0.0698188	0.124033	-0.0785493	-0.461363	0.617646	-0.0496277	0.0376989	0.0147955	3.72946e-14
Annual_Mean_Temp	0.249183	0.223358	-0.282697	0.0112272	-0.0916799	-0.0922985	0.0166078	-0.117369	0.0592803	0.129496	-0.0429887	0.24703	-0.0111994	0.0663758	0.0141053	-0.0158921	-0.827601	-0.0627596	-2.51983e-13
Precip_Warmest_Quarter	-0.231257	0.266012	-0.128357	-0.236503	0.107092	-0.00292664	-0.567337	0.297657	0.0782518	0.201057	0.458735	0.168619	0.153011	0.238624	0.0666109	0.0873286	0.0562347	0.0200884	6.88201e-15
Annual_Precip	-0.213226	0.349723	0.0337432	0.0539545	0.0851205	0.0204468	-0.00327048	0.0333862	0.0175292	0.0255998	-0.088936	0.00405809	0.415502	-0.532343	-0.587829	-0.080799	-0.0407531	-0.0271561	-1.65275e-14
Precip_Wettest_Quarter	-0.0643811	0.373245	0.0973088	-0.177306	0.429636	-0.0566736	0.0424002	0.0270641	-0.119547	0.142638	0.0373001	-0.356342	-0.647056	-0.181486	0.00939898	-0.0317303	-0.0973278	-0.0106108	-2.30753e-14
Mean_Temp_Wettest_Quarter	-0.0596175	0.097878	-0.356738	-0.502619	-0.184339	0.496072	0.346741	0.388438	0.0506764	-0.146858	-0.15832	-0.0728502	0.00182779	0.0184262	0.0241273	0.0167375	0.00905226	0.00119808	1.19593e-15
Mean_Diurnal_Range	0.0508252	-0.244494	-0.274598	0.273814	0.498694	0.511935	-0.204466	-0.0684261	-0.0187442	-0.270562	0.078451	0.217966	-0.145214	-0.0112553	-0.146099	-0.242205	-0.0388368	-0.00709569	1.26368e-14
Precip_Wettest_Month	-0.0482223	0.370988	0.0749676	-0.194162	0.445027	-0.125051	0.127274	-0.258576	-0.124665	-0.324957	-0.318893	0.200858	0.313462	0.298333	0.242889	0.0137018	0.100178	0.0179592	3.22928e-14
Mean_Temp_Warmest_Quarter	0.036499	0.143679	-0.505343	0.0808086	-0.051633	-0.262708	0.121854	-0.0865297	0.0911673	0.306278	-0.169458	0.327239	-0.237797	0.0383028	-0.151058	-0.166966	0.416891	0.318869	9.96747e-14
Max_Temp_Warmest.Month	0.0286658	-0.00630969	-0.51982	0.209332	0.180601	-0.148518	0.179847	-0.0970982	0.00878788	-0.0479817	0.295349	-0.505034	0.285401	-0.0509946	0.157815	0.198502	0.0170494	0.0287077	-0.307425
Precip_Coldest_Quarter	0.025762	0.267108	0.288247	0.416978	0.109628	0.265507	0.527051	0.193627	0.173638	0.250182	0.297104	0.179284	0.0424697	0.224934	0.0228183	0.0769219	0.0335928	0.0112412	0
