# Supplementary material for: Species clustering, climate effects, and introduced species in 5 million city trees across 63 US cities
Source: eLife. 2022 Sep 27;11:e77891. doi: 10.7554/eLife.77891 (PMC9578703; doi:10.7554/eLife.77891)
Supplement: Supplementary file 1. [file elife-77891-supp1.xlsx]

## Sheet: Sheet1
Column Name	Definition
city_ID	Unique identifier given to the tree by the city
tree_ID	our unique identifier for each tree
planted_date	date tree was planted
most_recent_observation	most recent observation date of tree (among dates such as condition, date, edit, date, inspect, date)
retired_date	date tree was retired.
most_recent_observation_type	what is the most recent observation? condition, date, edit, date, etc.
common_name	plain english common name of the tree species
scientific_name	biological name of the tree species (Quercus rubra)
greater_metro	greater metro area in which the city is found, which will match the "city name" in the filename (Atlanta, for example, which includes Decatur and other suburbs)
city	city name, as it is properly spelled (Las Vegas)
state	state name (as it is properly spelled, not abbreviation)
longitude_coordinate	exact location of tree species (longitude)
latitude_coordinate	exact location of tree species (latitude)
location_type	where the tree is located (green, space, built, environment, no, info)
zipcode	zipcode of the location
address	address where the data was collected
neighborhood	neighborhood of the location of the tree
location_name	If the location is named without being an address, such as Smith Cemetery or Route 11 Median
ward	city ward
district	the district tree is located
overhead_utility	Is there an overhead utility (yes, no, conflicting)?
diameter_breast_height_CM	trunk diameter in cm at breast height
condition	tree condition as coded by the city-specific protocol
height_M	height of tree in meters
native	Is the tree native to the state (”naturally_occurring”), not native (”introduced”), or of unknown status due, for example, to being only genus level (no_info)? Assignments according to BONAP data.
height_binned_M	range of heights into which the tree falls, converted from feet.
diameter_breast_height_binned_CM	range of diameters into which the tree falls, converted from inches often
percent_population	some sheets are in "summary" format with only percent of population represented for each species.
