# Supplementary material for: Species clustering, climate effects, and introduced species in 5 million city trees across 63 US cities
Source: eLife. 2022 Sep 27;11:e77891. doi: 10.7554/eLife.77891 (PMC9578703; doi:10.7554/eLife.77891)
Supplement: Supplementary file 2. — We ran six sensitivity analyses as follows. In Model 1, the independent variable was effective species as calculated for a given population of 37,000 trees (‘effective species for a standardized population size’). In Model 2, the independent variable was the asymptotic estimate of the effective species number for that city as calculated using iNext. In Model 3, the independent variable was the raw effective species number. In Model 4, we excluded cities with fewer than 10,000 trees. In Model 5, we excluded cities with <50% spatial coverage. In Model 6, we excluded cities with <0.995 sample coverage as calculated by iNext. For Models 4—6, the independent variable was effective species for a standardized population size of 37,000 trees. We use p = 0.05 as our threshold for significance; it is important to note that we do not apply a Bonferroni multiple-testing correction, because these are sensitivity analyses repeating the original test (rather than new, but statistically related, hypothesis tests). [file elife-77891-supp2.xlsx]

## Sheet: Sheet1
Model	AIC	adj. R2	coefficient	estimate	95% conf. int.	p-value	Ncities
1	535.39	0.11					63
			Comp.1	2.11	[0.51, 3.72]	0.011*
			tree_city_USAyes	15.57	[1.34, 29.8]	0.033*
			Comp.1:Comp.2	-0.53	[-1.38, 0.31]	0.21
2	536.02	0.11					63
			Comp.1	2.13	[0.51, 3.74]	0.011*
			tree_city_USAyes	15.65	[1.35, 29.95]	0.033*
			Comp.1:Comp.2	-0.53	[-1.38, 0.31]	0.21
3	534.39	0.11					63
			Comp.1	2.04	[0.45, 3.64]	0.013*
			tree_city_USAyes	15.27	[1.15, 29.39]	0.035*
			Comp.1:Comp.2	-0.56	[-1.4, 0.28]	0.19
4	419.39	0.1					49
			Comp.1	2	[0.18, 3.81]	0.033*
			tree_city_USAyes	8.96	[-10.33, 28.25]	0.36
			Comp.1:Comp.2	-0.67	[-1.66, 0.32]	0.19
5	240.6	0.18					28
			Comp.1	2.75	[0.11, 5.38]	0.048*
			tree_city_USAyes	15.35	[-4.51, 35.2]	0.14
			Comp.1:Comp.2	-0.46	[-2.34, 1.42]	0.63
6	477.88	0.11					56
			Comp.1	1.93	[0.14, 3.71]	0.035*
			tree_city_USAyes	15.62	[-0.5, 31.73]	0.058
			Comp.1:Comp.2	-0.79	[-1.72, 0.15]	0.1
