# Supplementary material for: Species clustering, climate effects, and introduced species in 5 million city trees across 63 US cities
Source: eLife. 2022 Sep 27;11:e77891. doi: 10.7554/eLife.77891 (PMC9578703; doi:10.7554/eLife.77891)
Supplement: Supplementary file 4. — For size, smaller trees (lower diameter at breast height) tended to have better condition (12 of 18 cities). For location type, trees in the built environment tended to have better condition than those in parks (four of eight cities). For native status, results were mixed (naturally occurring trees had no difference in condition for 6 of 19 cities, worse condition in 7 cities, and better condition in 6 cities). Significant odds ratios and models are marked with *p < 0.05, **p < 0.005, ***p < 0.0005, or NS: p ≥ 0.05. [file elife-77891-supp4.xlsx]

## Sheet: Sheet1
	Location type		Diameter breast height (DBH)		Nativity status		Model p-val	Ntrees
city	odds ratio	95% CI	odds ratio	95% CI	odds ratio	95% CI
Las Vegas	0.11*	[0.02, 0.81]	-	-	0.96(NS)	[0.86, 1.07]	**	23407
Sioux Falls	0.12***	[0.11, 0.13]	0.9697***	[0.9664, 0.9731]	1.06(NS)	[0.97, 1.16]	***	56499
Aurora, CO	0.55***	[0.51, 0.59]	1.0079***	[1.0062, 1.0095]	1.63***	[1.46, 1.82]	***	39763
Knoxville	0.56***	[0.48, 0.65]	0.9997(NS)	[0.9993, 1.0001]	0.51***	[0.43, 0.61]	***	7663
Minneapolis	0.96(NS)	[0.84, 1.1]	0.9982**	[0.9971, 0.9994]	1.13**	[1.05, 1.21]	**	160401
Honolulu	1.23(NS)	[0.75, 2]	1.0094**	[1.0034, 1.0153]	0.62(NS)	[0.15, 2.58]	**	11138
Louisville	1.24***	[1.1, 1.4]	0.9967***	[0.9951, 0.9983]	0.95(NS)	[0.82, 1.11]	***	20388
Columbus	1.83***	[1.75, 1.91]	0.9876***	[0.987, 0.9882]	0.26***	[0.25, 0.27]	***	118348
San Jose	-	-	1.0005(NS)	[0.9996, 1.0014]	0.31***	[0.29, 0.32]	***	157579
Greensboro	-	-	0.9944*	[0.9903, 0.9984]	0.53**	[0.35, 0.8]	***	2992
Milwaukee	-	-	0.9965**	[0.9945, 0.9986]	0.68***	[0.61, 0.76]	***	26444
Seattle	-	-	0.9974***	[0.9963, 0.9985]	0.75***	[0.7, 0.82]	***	130606
StLouis	-	-	0.9935***	[0.9925, 0.9944]	0.94*	[0.9, 0.99]	***	78033
Durham	-	-	1.004*	[1.0005, 1.0076]	1.05(NS)	[0.84, 1.31]	*	12194
Portland	-	-	0.9884***	[0.9874, 0.9894]	1.08(NS)	[0.99, 1.18]	***	71394
New York	-	-	1.0195***	[1.0187, 1.0202]	1.08***	[1.05, 1.11]	***	599866
Washington, DC	-	-	0.9884***	[0.9875, 0.9892]	1.1***	[1.05, 1.16]	***	143480
Austin	-	-	0.9851***	[0.982, 0.9882]	1.58***	[1.3, 1.93]	***	5651
Plano	-	-	0.9893***	[0.9863, 0.9923]	2.06***	[1.78, 2.38]	***	20570
