# Supplementary figures and images for: Species clustering, climate effects, and introduced species in 5 million city trees across 63 US cities (part 1 of 2)
Source: eLife journal article supplement (doi:10.7554/elife.77891), 2022-09-14

# Albuquerque

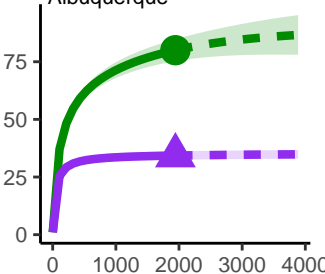

Supplement: fig2-data1 [file Albuquerque_RarefactionPlot_Diversity_all.pdf › Rarefaction_Plots/Albuquerque_RarefactionPlot_Diversity_all.pdf]

# Albuquerque

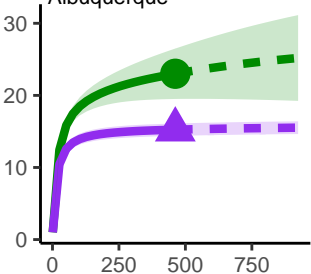

Supplement: fig2-data1 [file Albuquerque_RarefactionPlot_Diversity_native.pdf › Rarefaction_Plots/Albuquerque_RarefactionPlot_Diversity_native.pdf]

Anaheim

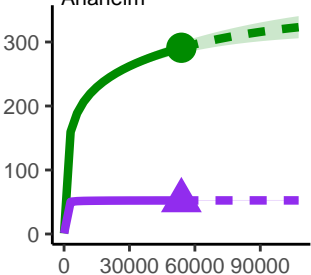

Supplement: fig2-data1 [file Anaheim_RarefactionPlot_Diversity_all.pdf › Rarefaction_Plots/Anaheim_RarefactionPlot_Diversity_all.pdf]

# Anaheim

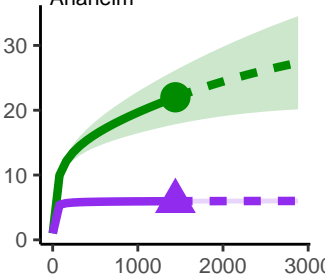

Supplement: fig2-data1 [file Anaheim_RarefactionPlot_Diversity_native.pdf › Rarefaction_Plots/Anaheim_RarefactionPlot_Diversity_native.pdf]

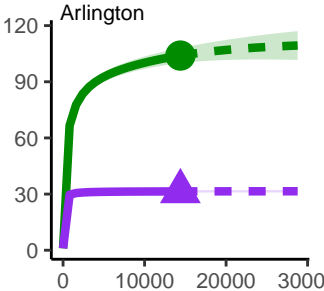

Supplement: fig2-data1 [file Arlington_RarefactionPlot_Diversity_all.pdf › Rarefaction_Plots/Arlington_RarefactionPlot_Diversity_all.pdf]

Arlington

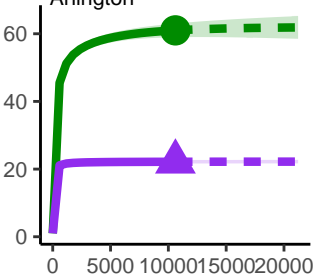

Supplement: fig2-data1 [file Arlington_RarefactionPlot_Diversity_native.pdf › Rarefaction_Plots/Arlington_RarefactionPlot_Diversity_native.pdf]

Atlanta

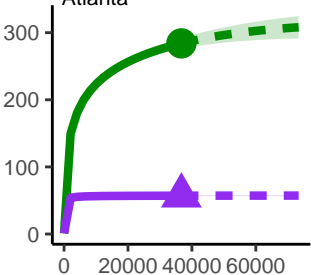

Supplement: fig2-data1 [file Atlanta_RarefactionPlot_Diversity_all.pdf › Rarefaction_Plots/Atlanta_RarefactionPlot_Diversity_all.pdf]

Atlanta

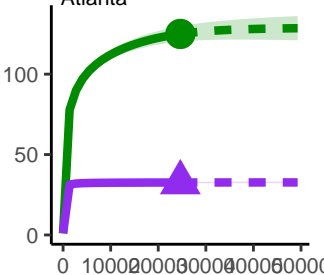

Supplement: fig2-data1 [file Atlanta_RarefactionPlot_Diversity_native.pdf › Rarefaction_Plots/Atlanta_RarefactionPlot_Diversity_native.pdf]

AuroraCO

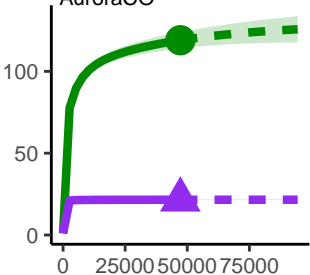

Supplement: fig2-data1 [file Aurora (CO)_RarefactionPlot_Diversity_all.pdf › Rarefaction_Plots/Aurora (CO)_RarefactionPlot_Diversity_all.pdf]

AuroraCO

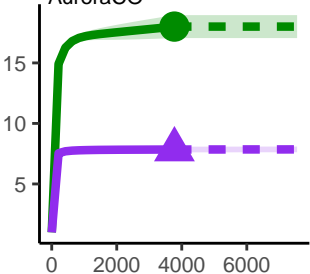

Supplement: fig2-data1 [file Aurora (CO)_RarefactionPlot_Diversity_native.pdf › Rarefaction_Plots/Aurora (CO)_RarefactionPlot_Diversity_native.pdf]

Austin

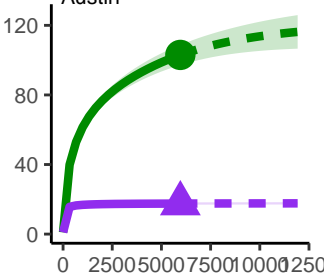

Supplement: fig2-data1 [file Austin_RarefactionPlot_Diversity_all.pdf › Rarefaction_Plots/Austin_RarefactionPlot_Diversity_all.pdf]

Austin

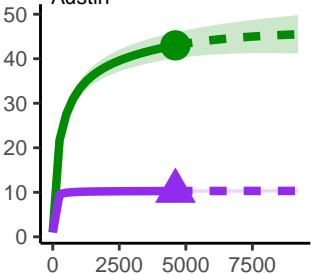

Supplement: fig2-data1 [file Austin_RarefactionPlot_Diversity_native.pdf › Rarefaction_Plots/Austin_RarefactionPlot_Diversity_native.pdf]

# Baltimore

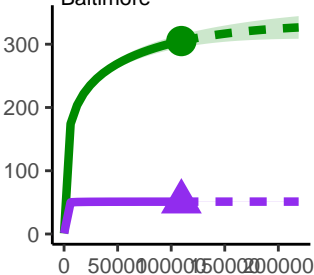

Supplement: fig2-data1 [file Baltimore_RarefactionPlot_Diversity_all.pdf › Rarefaction_Plots/Baltimore_RarefactionPlot_Diversity_all.pdf]

## Baltimore

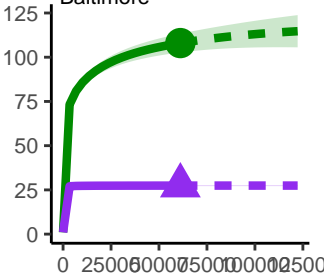

Supplement: fig2-data1 [file Baltimore_RarefactionPlot_Diversity_native.pdf › Rarefaction_Plots/Baltimore_RarefactionPlot_Diversity_native.pdf]

Boston

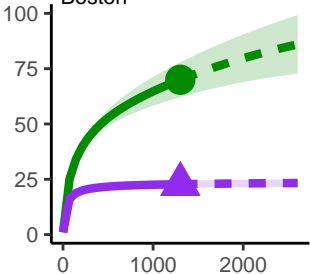

Supplement: fig2-data1 [file Boston_RarefactionPlot_Diversity_all.pdf › Rarefaction_Plots/Boston_RarefactionPlot_Diversity_all.pdf]

# Boston

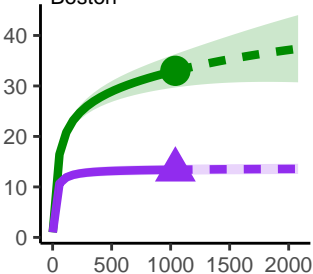

Supplement: fig2-data1 [file Boston_RarefactionPlot_Diversity_native.pdf › Rarefaction_Plots/Boston_RarefactionPlot_Diversity_native.pdf]

# Buffalo

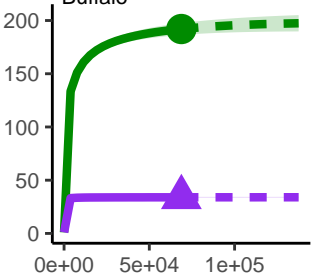

Supplement: fig2-data1 [file Buffalo_RarefactionPlot_Diversity_all.pdf › Rarefaction_Plots/Buffalo_RarefactionPlot_Diversity_all.pdf]

## Buffalo

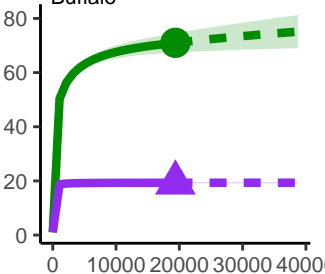

Supplement: fig2-data1 [file Buffalo_RarefactionPlot_Diversity_native.pdf › Rarefaction_Plots/Buffalo_RarefactionPlot_Diversity_native.pdf]

# CapeCoral

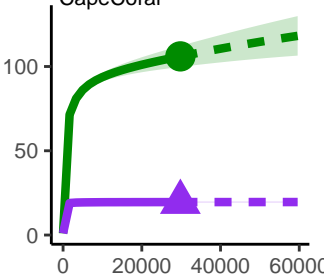

Supplement: fig2-data1 [file Cape Coral_RarefactionPlot_Diversity_all.pdf › Rarefaction_Plots/Cape Coral_RarefactionPlot_Diversity_all.pdf]

CapeCoral

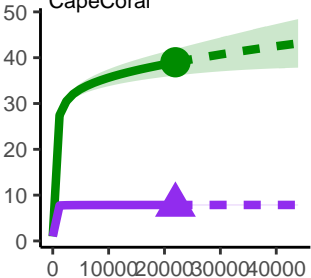

Supplement: fig2-data1 [file Cape Coral_RarefactionPlot_Diversity_native.pdf › Rarefaction_Plots/Cape Coral_RarefactionPlot_Diversity_native.pdf]

# ColoradoSprings

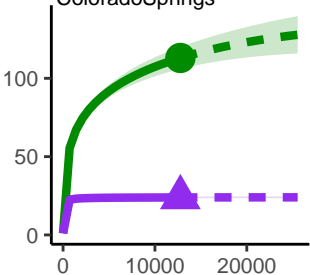

Supplement: fig2-data1 [file Colorado Springs_RarefactionPlot_Diversity_all.pdf › Rarefaction_Plots/Colorado Springs_RarefactionPlot_Diversity_all.pdf]

# ColoradoSprings

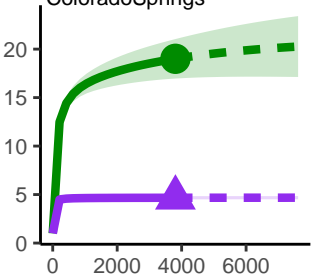

Supplement: fig2-data1 [file Colorado Springs_RarefactionPlot_Diversity_native.pdf › Rarefaction_Plots/Colorado Springs_RarefactionPlot_Diversity_native.pdf]

# Columbus

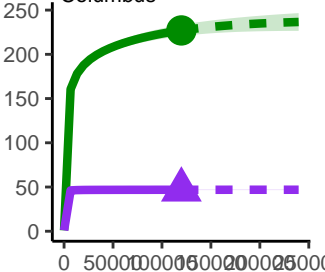

Supplement: fig2-data1 [file Columbus_RarefactionPlot_Diversity_all.pdf › Rarefaction_Plots/Columbus_RarefactionPlot_Diversity_all.pdf]

# Columbus

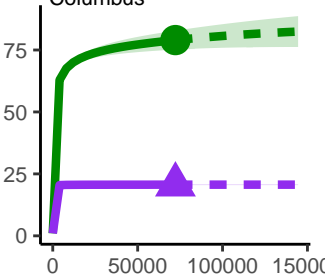

Supplement: fig2-data1 [file Columbus_RarefactionPlot_Diversity_native.pdf › Rarefaction_Plots/Columbus_RarefactionPlot_Diversity_native.pdf]

Dallas

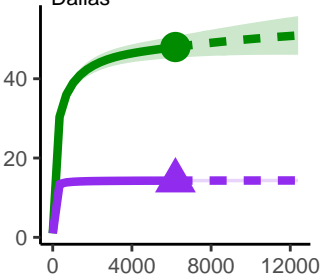

Supplement: fig2-data1 [file Dallas_RarefactionPlot_Diversity_all.pdf › Rarefaction_Plots/Dallas_RarefactionPlot_Diversity_all.pdf]

Dallas

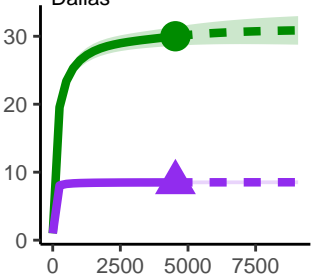

Supplement: fig2-data1 [file Dallas_RarefactionPlot_Diversity_native.pdf › Rarefaction_Plots/Dallas_RarefactionPlot_Diversity_native.pdf]

Denver

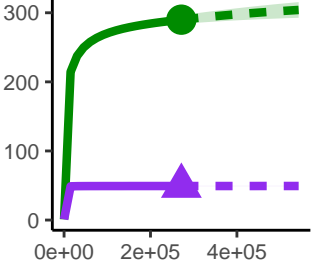

Supplement: fig2-data1 [file Denver_RarefactionPlot_Diversity_all.pdf › Rarefaction_Plots/Denver_RarefactionPlot_Diversity_all.pdf]

Denver

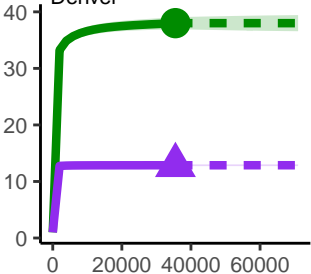

Supplement: fig2-data1 [file Denver_RarefactionPlot_Diversity_native.pdf › Rarefaction_Plots/Denver_RarefactionPlot_Diversity_native.pdf]

Des Moines

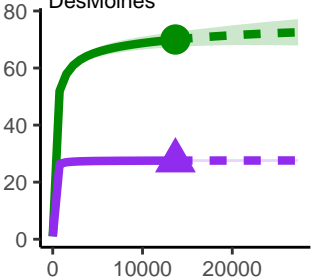

Supplement: fig2-data1 [file Des Moines_RarefactionPlot_Diversity_all.pdf › Rarefaction_Plots/Des Moines_RarefactionPlot_Diversity_all.pdf]

DesMoines

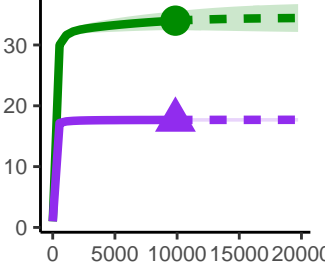

Supplement: fig2-data1 [file Des Moines_RarefactionPlot_Diversity_native.pdf › Rarefaction_Plots/Des Moines_RarefactionPlot_Diversity_native.pdf]

# Detroit

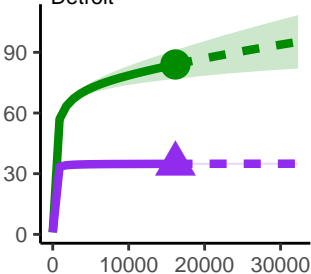

Supplement: fig2-data1 [file Detroit_RarefactionPlot_Diversity_all.pdf › Rarefaction_Plots/Detroit_RarefactionPlot_Diversity_all.pdf]

# Detroit

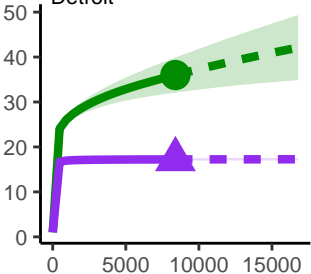

Supplement: fig2-data1 [file Detroit_RarefactionPlot_Diversity_native.pdf › Rarefaction_Plots/Detroit_RarefactionPlot_Diversity_native.pdf]

Durham

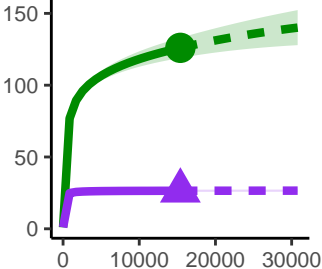

Supplement: fig2-data1 [file Durham_RarefactionPlot_Diversity_all.pdf › Rarefaction_Plots/Durham_RarefactionPlot_Diversity_all.pdf]

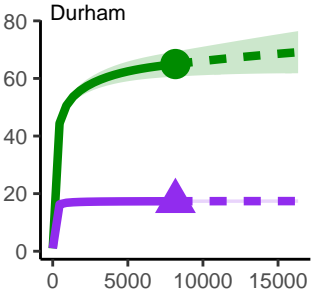

Supplement: fig2-data1 [file Durham_RarefactionPlot_Diversity_native.pdf › Rarefaction_Plots/Durham_RarefactionPlot_Diversity_native.pdf]

Fresno

80  
60  
40  
20  
0

0 2500 5000 7500 10000 12500

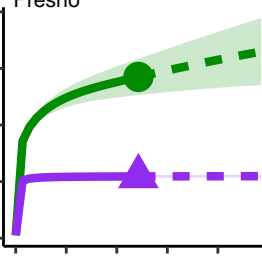

Supplement: fig2-data1 [file Fresno_RarefactionPlot_Diversity_all.pdf › Rarefaction_Plots/Fresno_RarefactionPlot_Diversity_all.pdf]

Fresno

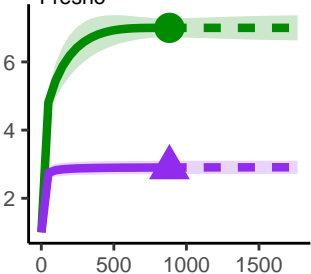

Supplement: fig2-data1 [file Fresno_RarefactionPlot_Diversity_native.pdf › Rarefaction_Plots/Fresno_RarefactionPlot_Diversity_native.pdf]

# GardenGrove

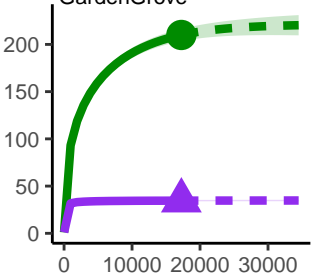

Supplement: fig2-data1 [file Garden Grove_RarefactionPlot_Diversity_all.pdf › Rarefaction_Plots/Garden Grove_RarefactionPlot_Diversity_all.pdf]

# GardenGrove

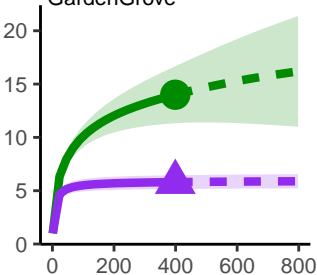

Supplement: fig2-data1 [file Garden Grove_RarefactionPlot_Diversity_native.pdf › Rarefaction_Plots/Garden Grove_RarefactionPlot_Diversity_native.pdf]

# GrandRapids

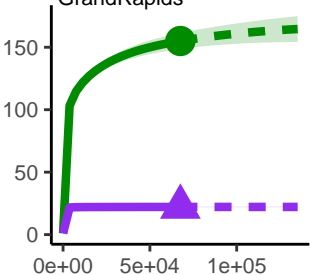

Supplement: fig2-data1 [file Grand Rapids_RarefactionPlot_Diversity_all.pdf › Rarefaction_Plots/Grand Rapids_RarefactionPlot_Diversity_all.pdf]

# GrandRapids

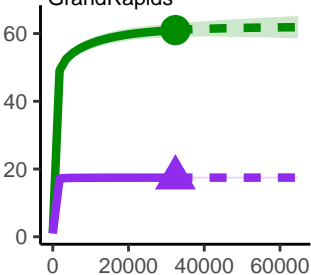

Supplement: fig2-data1 [file Grand Rapids_RarefactionPlot_Diversity_native.pdf › Rarefaction_Plots/Grand Rapids_RarefactionPlot_Diversity_native.pdf]

# Greensboro

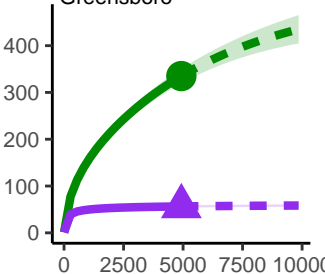

Supplement: fig2-data1 [file Greensboro_RarefactionPlot_Diversity_all.pdf › Rarefaction_Plots/Greensboro_RarefactionPlot_Diversity_all.pdf]

# Greensboro

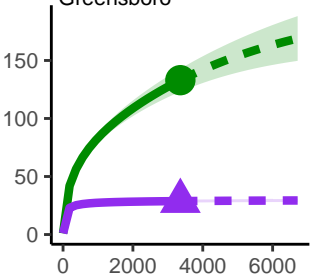

Supplement: fig2-data1 [file Greensboro_RarefactionPlot_Diversity_native.pdf › Rarefaction_Plots/Greensboro_RarefactionPlot_Diversity_native.pdf]

# Honolulu

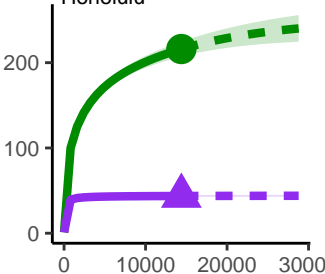

Supplement: fig2-data1 [file Honolulu_RarefactionPlot_Diversity_all.pdf › Rarefaction_Plots/Honolulu_RarefactionPlot_Diversity_all.pdf]

# Honolulu

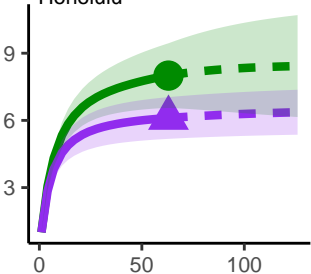

Supplement: fig2-data1 [file Honolulu_RarefactionPlot_Diversity_native.pdf › Rarefaction_Plots/Honolulu_RarefactionPlot_Diversity_native.pdf]

# Houston

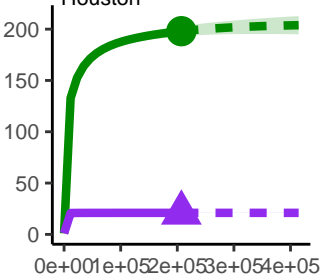

Supplement: fig2-data1 [file Houston_RarefactionPlot_Diversity_all.pdf › Rarefaction_Plots/Houston_RarefactionPlot_Diversity_all.pdf]

# Houston

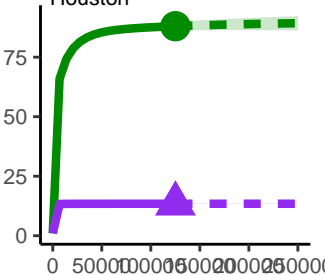

Supplement: fig2-data1 [file Houston_RarefactionPlot_Diversity_native.pdf › Rarefaction_Plots/Houston_RarefactionPlot_Diversity_native.pdf]

# HuntingtonBeach

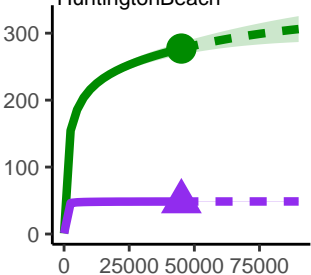

Supplement: fig2-data1 [file Huntington Beach_RarefactionPlot_Diversity_all.pdf › Rarefaction_Plots/Huntington Beach_RarefactionPlot_Diversity_all.pdf]

# HuntingtonBeach

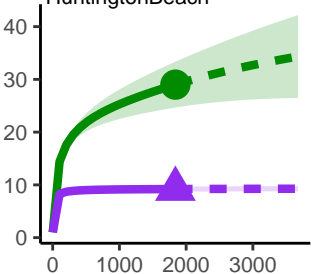

Supplement: fig2-data1 [file Huntington Beach_RarefactionPlot_Diversity_native.pdf › Rarefaction_Plots/Huntington Beach_RarefactionPlot_Diversity_native.pdf]

# Indianapolis

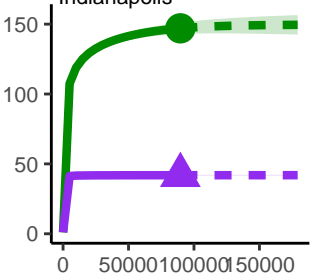

Supplement: fig2-data1 [file Indianapolis_RarefactionPlot_Diversity_all.pdf › Rarefaction_Plots/Indianapolis_RarefactionPlot_Diversity_all.pdf]

# Indianapolis

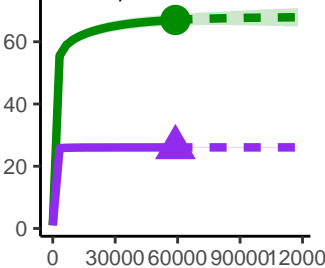

Supplement: fig2-data1 [file Indianapolis_RarefactionPlot_Diversity_native.pdf › Rarefaction_Plots/Indianapolis_RarefactionPlot_Diversity_native.pdf]

Irvine

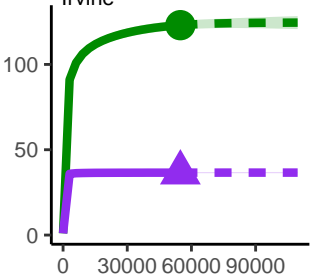

Supplement: fig2-data1 [file Irvine_RarefactionPlot_Diversity_all.pdf › Rarefaction_Plots/Irvine_RarefactionPlot_Diversity_all.pdf]

Irvine

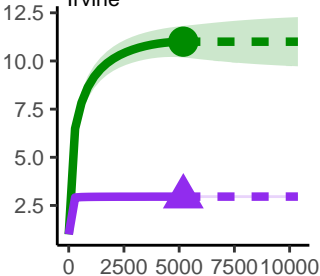

Supplement: fig2-data1 [file Irvine_RarefactionPlot_Diversity_native.pdf › Rarefaction_Plots/Irvine_RarefactionPlot_Diversity_native.pdf]

# Jerseycity

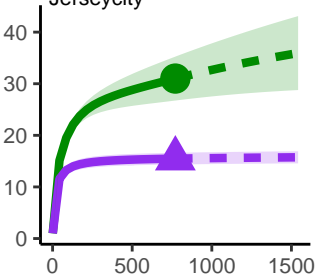

Supplement: fig2-data1 [file Jersey City_RarefactionPlot_Diversity_all.pdf › Rarefaction_Plots/Jersey City_RarefactionPlot_Diversity_all.pdf]

Jerseycity

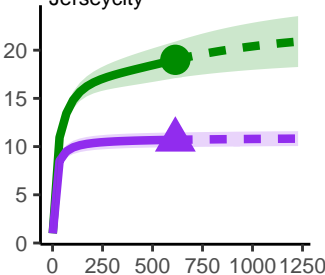

Supplement: fig2-data1 [file Jersey City_RarefactionPlot_Diversity_native.pdf › Rarefaction_Plots/Jersey City_RarefactionPlot_Diversity_native.pdf]

## Knoxville

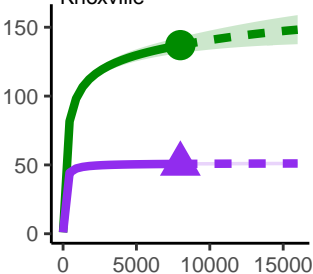

Supplement: fig2-data1 [file Knoxville_RarefactionPlot_Diversity_all.pdf › Rarefaction_Plots/Knoxville_RarefactionPlot_Diversity_all.pdf]

# Knoxville

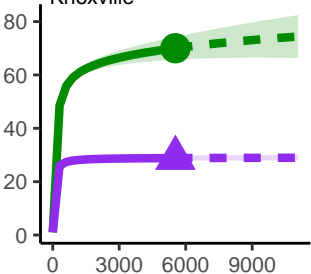

Supplement: fig2-data1 [file Knoxville_RarefactionPlot_Diversity_native.pdf › Rarefaction_Plots/Knoxville_RarefactionPlot_Diversity_native.pdf]

Las Vegas

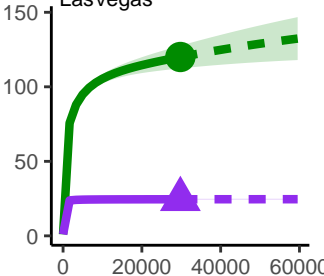

Supplement: fig2-data1 [file Las Vegas_RarefactionPlot_Diversity_all.pdf › Rarefaction_Plots/Las Vegas_RarefactionPlot_Diversity_all.pdf]

Las Vegas

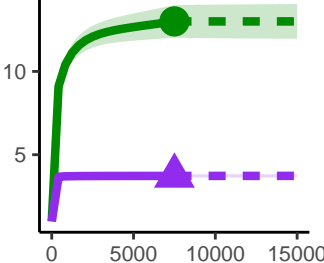

Supplement: fig2-data1 [file Las Vegas_RarefactionPlot_Diversity_native.pdf › Rarefaction_Plots/Las Vegas_RarefactionPlot_Diversity_native.pdf]

LosAngeles

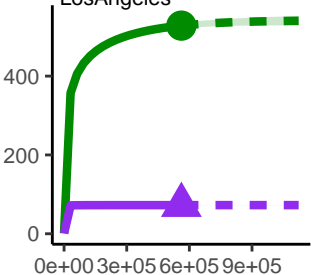

Supplement: fig2-data1 [file Los Angeles_RarefactionPlot_Diversity_all.pdf › Rarefaction_Plots/Los Angeles_RarefactionPlot_Diversity_all.pdf]

# LosAngeles

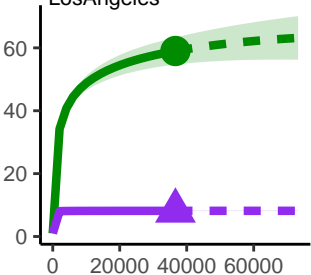

Supplement: fig2-data1 [file Los Angeles_RarefactionPlot_Diversity_native.pdf › Rarefaction_Plots/Los Angeles_RarefactionPlot_Diversity_native.pdf]

## Louisville

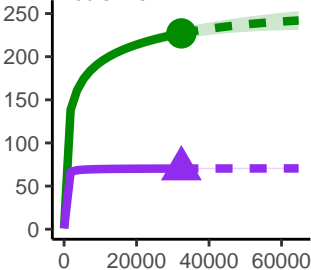

Supplement: fig2-data1 [file Louisville_RarefactionPlot_Diversity_all.pdf › Rarefaction_Plots/Louisville_RarefactionPlot_Diversity_all.pdf]

Louisville

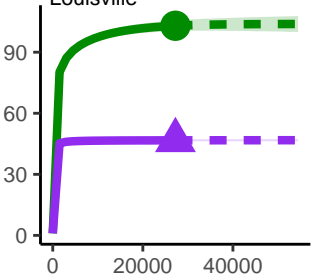

Supplement: fig2-data1 [file Louisville_RarefactionPlot_Diversity_native.pdf › Rarefaction_Plots/Louisville_RarefactionPlot_Diversity_native.pdf]

Madison

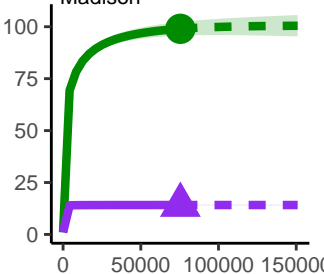

Supplement: fig2-data1 [file Madison_RarefactionPlot_Diversity_all.pdf › Rarefaction_Plots/Madison_RarefactionPlot_Diversity_all.pdf]

Madison

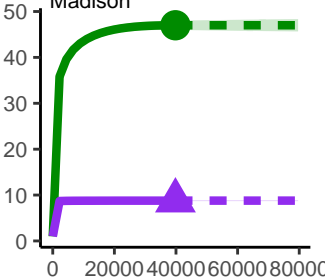

Supplement: fig2-data1 [file Madison_RarefactionPlot_Diversity_native.pdf › Rarefaction_Plots/Madison_RarefactionPlot_Diversity_native.pdf]

Miami

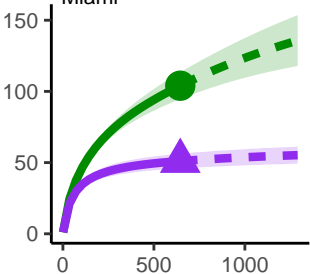

Supplement: fig2-data1 [file Miami_RarefactionPlot_Diversity_all.pdf › Rarefaction_Plots/Miami_RarefactionPlot_Diversity_all.pdf]

Miami

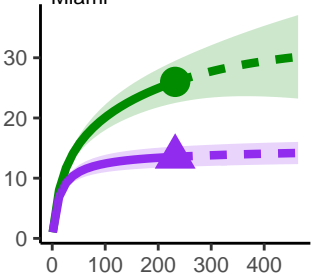

Supplement: fig2-data1 [file Miami_RarefactionPlot_Diversity_native.pdf › Rarefaction_Plots/Miami_RarefactionPlot_Diversity_native.pdf]

# Milwaukee

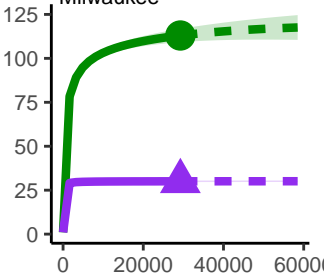

Supplement: fig2-data1 [file Milwaukee_RarefactionPlot_Diversity_all.pdf › Rarefaction_Plots/Milwaukee_RarefactionPlot_Diversity_all.pdf]

Milwaukee

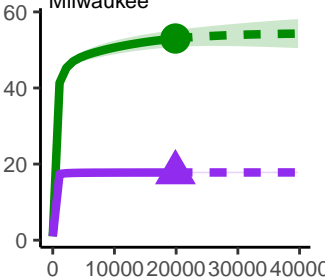

Supplement: fig2-data1 [file Milwaukee_RarefactionPlot_Diversity_native.pdf › Rarefaction_Plots/Milwaukee_RarefactionPlot_Diversity_native.pdf]

Minneapolis

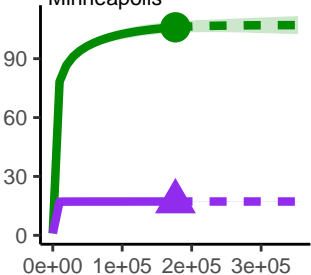

Supplement: fig2-data1 [file Minneapolis_RarefactionPlot_Diversity_all.pdf › Rarefaction_Plots/Minneapolis_RarefactionPlot_Diversity_all.pdf]

# Minneapolis

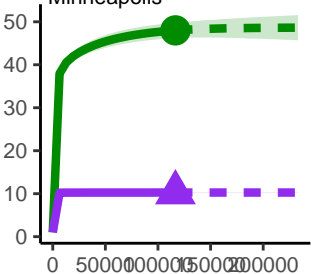

Supplement: fig2-data1 [file Minneapolis_RarefactionPlot_Diversity_native.pdf › Rarefaction_Plots/Minneapolis_RarefactionPlot_Diversity_native.pdf]

# Nashville

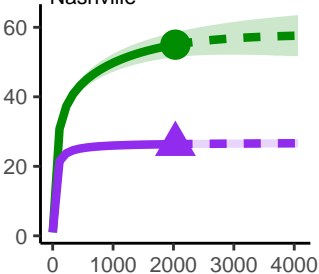

Supplement: fig2-data1 [file Nashville_RarefactionPlot_Diversity_all.pdf › Rarefaction_Plots/Nashville_RarefactionPlot_Diversity_all.pdf]

# Nashville

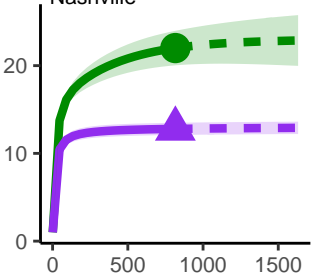

Supplement: fig2-data1 [file Nashville_RarefactionPlot_Diversity_native.pdf › Rarefaction_Plots/Nashville_RarefactionPlot_Diversity_native.pdf]

# NewOrleans

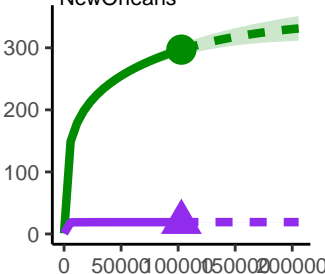

Supplement: fig2-data1 [file New Orleans_RarefactionPlot_Diversity_all.pdf › Rarefaction_Plots/New Orleans_RarefactionPlot_Diversity_all.pdf]

# NewOrleans

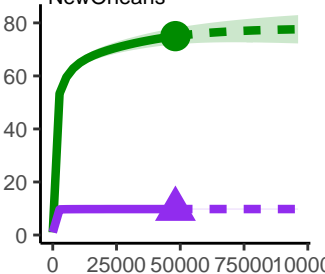

Supplement: fig2-data1 [file New Orleans_RarefactionPlot_Diversity_native.pdf › Rarefaction_Plots/New Orleans_RarefactionPlot_Diversity_native.pdf]

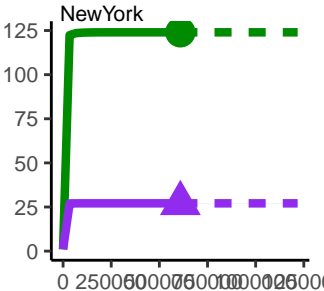

Supplement: fig2-data1 [file New York_RarefactionPlot_Diversity_all.pdf › Rarefaction_Plots/New York_RarefactionPlot_Diversity_all.pdf]

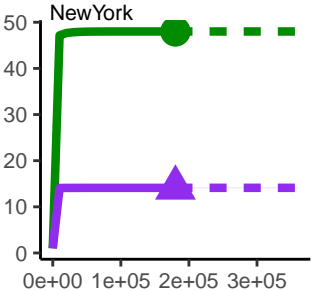

Supplement: fig2-data1 [file New York_RarefactionPlot_Diversity_native.pdf › Rarefaction_Plots/New York_RarefactionPlot_Diversity_native.pdf]

Oakland

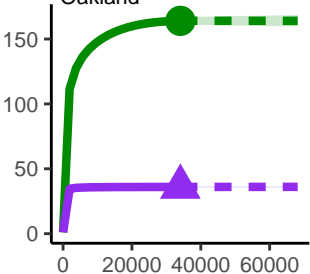

Supplement: fig2-data1 [file Oakland_RarefactionPlot_Diversity_all.pdf › Rarefaction_Plots/Oakland_RarefactionPlot_Diversity_all.pdf]

Oakland

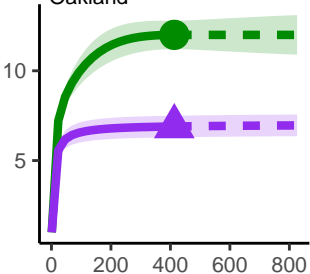

Supplement: fig2-data1 [file Oakland_RarefactionPlot_Diversity_native.pdf › Rarefaction_Plots/Oakland_RarefactionPlot_Diversity_native.pdf]

# OklahomaCity

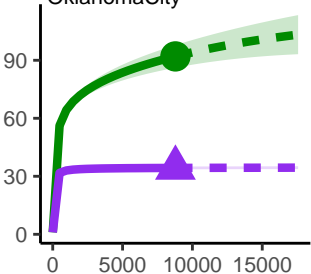

Supplement: fig2-data1 [file Oklahoma City_RarefactionPlot_Diversity_all.pdf › Rarefaction_Plots/Oklahoma City_RarefactionPlot_Diversity_all.pdf]

# OklahomaCity

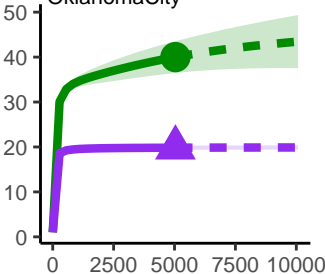

Supplement: fig2-data1 [file Oklahoma City_RarefactionPlot_Diversity_native.pdf › Rarefaction_Plots/Oklahoma City_RarefactionPlot_Diversity_native.pdf]

# Ontario

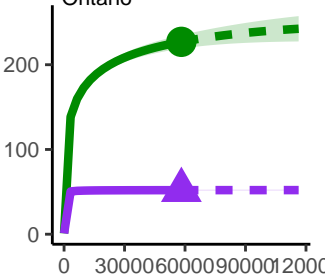

Supplement: fig2-data1 [file Ontario_RarefactionPlot_Diversity_all.pdf › Rarefaction_Plots/Ontario_RarefactionPlot_Diversity_all.pdf]

# Ontario

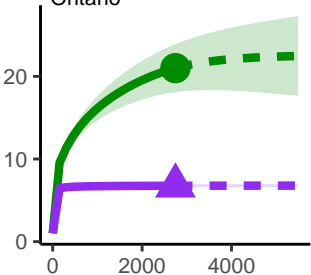

Supplement: fig2-data1 [file Ontario_RarefactionPlot_Diversity_native.pdf › Rarefaction_Plots/Ontario_RarefactionPlot_Diversity_native.pdf]

Orlando

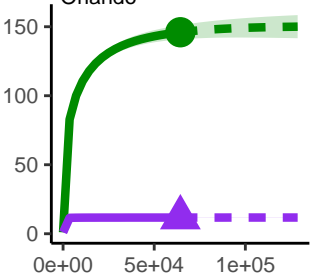

Supplement: fig2-data1 [file Orlando_RarefactionPlot_Diversity_all.pdf › Rarefaction_Plots/Orlando_RarefactionPlot_Diversity_all.pdf]

## Orlando

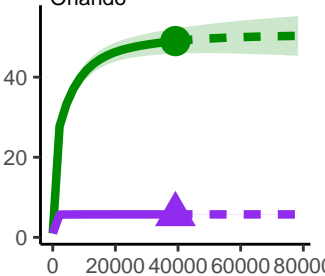

Supplement: fig2-data1 [file Orlando_RarefactionPlot_Diversity_native.pdf › Rarefaction_Plots/Orlando_RarefactionPlot_Diversity_native.pdf]

# OverlandPark

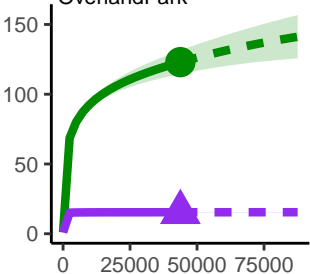

Supplement: fig2-data1 [file Overland Park_RarefactionPlot_Diversity_all.pdf › Rarefaction_Plots/Overland Park_RarefactionPlot_Diversity_all.pdf]

# OverlandPark

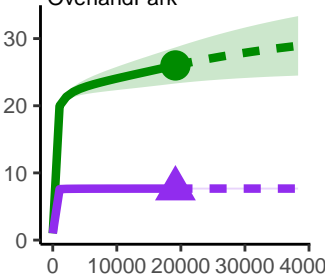

Supplement: fig2-data1 [file Overland Park_RarefactionPlot_Diversity_native.pdf › Rarefaction_Plots/Overland Park_RarefactionPlot_Diversity_native.pdf]

# Phoenix

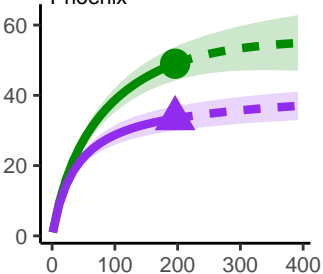

Supplement: fig2-data1 [file Phoenix_RarefactionPlot_Diversity_all.pdf › Rarefaction_Plots/Phoenix_RarefactionPlot_Diversity_all.pdf]

Phoenix

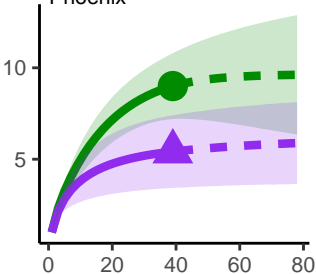

Supplement: fig2-data1 [file Phoenix_RarefactionPlot_Diversity_native.pdf › Rarefaction_Plots/Phoenix_RarefactionPlot_Diversity_native.pdf]

# Pittsburgh

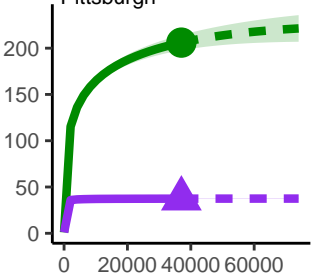

Supplement: fig2-data1 [file Pittsburgh_RarefactionPlot_Diversity_all.pdf › Rarefaction_Plots/Pittsburgh_RarefactionPlot_Diversity_all.pdf]

# Pittsburgh

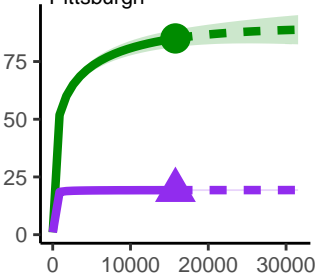

Supplement: fig2-data1 [file Pittsburgh_RarefactionPlot_Diversity_native.pdf › Rarefaction_Plots/Pittsburgh_RarefactionPlot_Diversity_native.pdf]

Plano

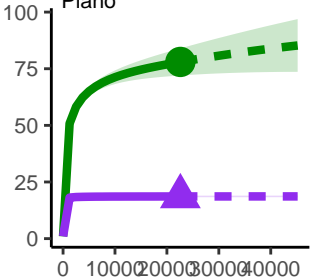

Supplement: fig2-data1 [file Plano_RarefactionPlot_Diversity_all.pdf › Rarefaction_Plots/Plano_RarefactionPlot_Diversity_all.pdf]

Plano

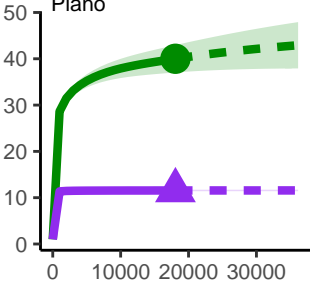

Supplement: fig2-data1 [file Plano_RarefactionPlot_Diversity_native.pdf › Rarefaction_Plots/Plano_RarefactionPlot_Diversity_native.pdf]

Portland

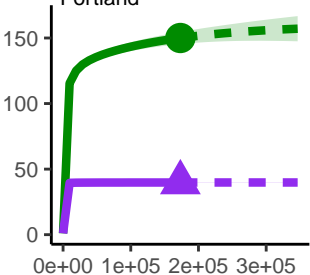

Supplement: fig2-data1 [file Portland_RarefactionPlot_Diversity_all.pdf › Rarefaction_Plots/Portland_RarefactionPlot_Diversity_all.pdf]

# Portland

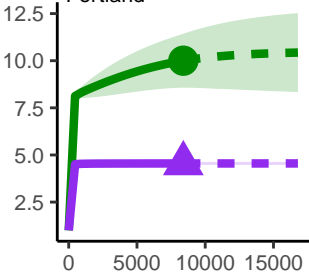

Supplement: fig2-data1 [file Portland_RarefactionPlot_Diversity_native.pdf › Rarefaction_Plots/Portland_RarefactionPlot_Diversity_native.pdf]

# Providence

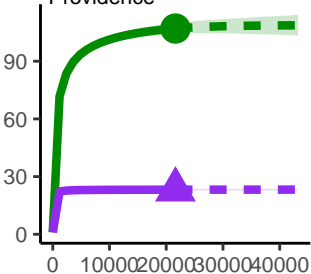

Supplement: fig2-data1 [file Providence_RarefactionPlot_Diversity_all.pdf › Rarefaction_Plots/Providence_RarefactionPlot_Diversity_all.pdf]

Providence

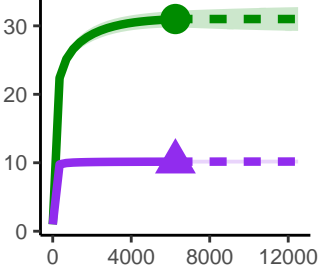

Supplement: fig2-data1 [file Providence_RarefactionPlot_Diversity_native.pdf › Rarefaction_Plots/Providence_RarefactionPlot_Diversity_native.pdf]

# RanchoCucamonga

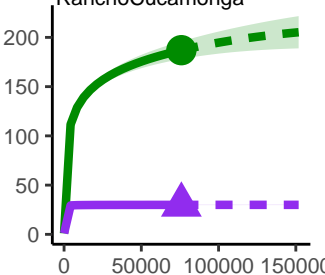

Supplement: fig2-data1 [file Rancho Cucamonga_RarefactionPlot_Diversity_all.pdf › Rarefaction_Plots/Rancho Cucamonga_RarefactionPlot_Diversity_all.pdf]

# RanchoCucamonga

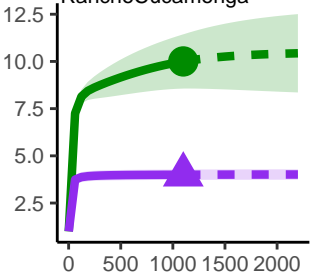

Supplement: fig2-data1 [file Rancho Cucamonga_RarefactionPlot_Diversity_native.pdf › Rarefaction_Plots/Rancho Cucamonga_RarefactionPlot_Diversity_native.pdf]

# Richmond

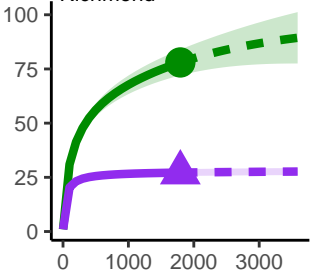

Supplement: fig2-data1 [file Richmond_RarefactionPlot_Diversity_all.pdf › Rarefaction_Plots/Richmond_RarefactionPlot_Diversity_all.pdf]

# Richmond

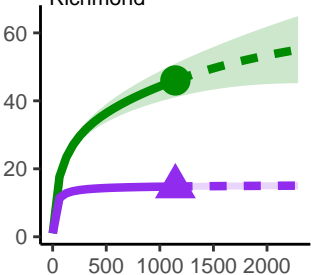

Supplement: fig2-data1 [file Richmond_RarefactionPlot_Diversity_native.pdf › Rarefaction_Plots/Richmond_RarefactionPlot_Diversity_native.pdf]
