# Supplementary figures and images for: Species clustering, climate effects, and introduced species in 5 million city trees across 63 US cities (part 2 of 2)
Source: eLife journal article supplement (doi:10.7554/elife.77891), 2022-09-14

Rochester

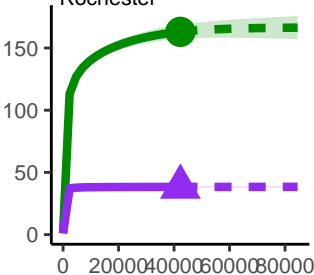

Supplement: fig2-data1 [file Rochester_RarefactionPlot_Diversity_all.pdf › Rarefaction_Plots/Rochester_RarefactionPlot_Diversity_all.pdf]

# Rochester

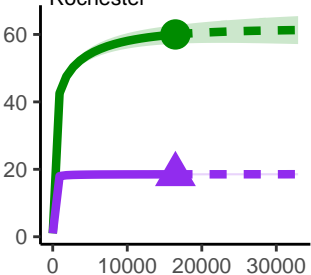

Supplement: fig2-data1 [file Rochester_RarefactionPlot_Diversity_native.pdf › Rarefaction_Plots/Rochester_RarefactionPlot_Diversity_native.pdf]

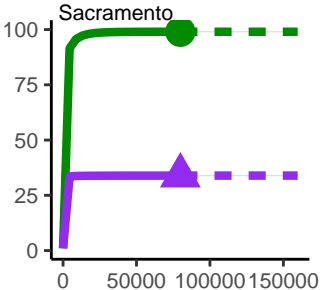

Supplement: fig2-data1 [file Sacramento_RarefactionPlot_Diversity_all.pdf › Rarefaction_Plots/Sacramento_RarefactionPlot_Diversity_all.pdf]

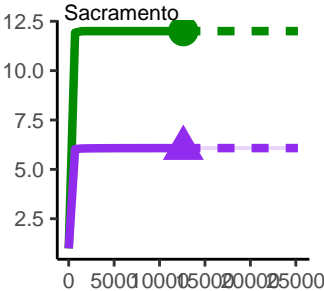

Supplement: fig2-data1 [file Sacramento_RarefactionPlot_Diversity_native.pdf › Rarefaction_Plots/Sacramento_RarefactionPlot_Diversity_native.pdf]

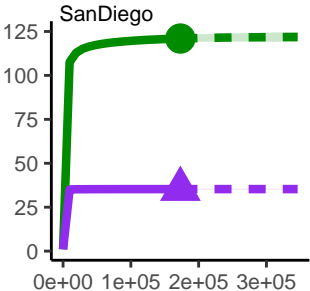

Supplement: fig2-data1 [file San Diego_RarefactionPlot_Diversity_all.pdf › Rarefaction_Plots/San Diego_RarefactionPlot_Diversity_all.pdf]

SanDiego

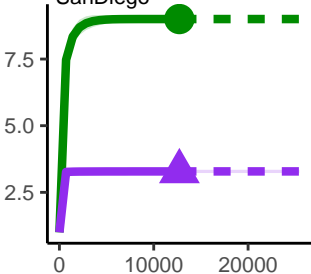

Supplement: fig2-data1 [file San Diego_RarefactionPlot_Diversity_native.pdf › Rarefaction_Plots/San Diego_RarefactionPlot_Diversity_native.pdf]

# San Francisco

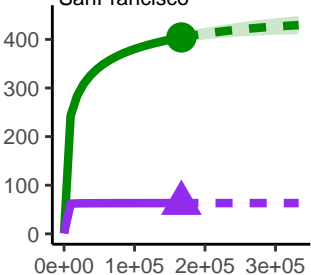

Supplement: fig2-data1 [file San Francisco_RarefactionPlot_Diversity_all.pdf › Rarefaction_Plots/San Francisco_RarefactionPlot_Diversity_all.pdf]

# San Francisco

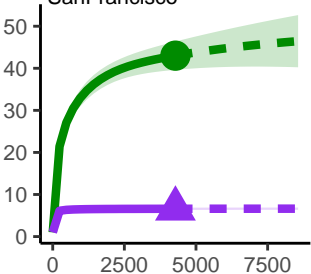

Supplement: fig2-data1 [file San Francisco_RarefactionPlot_Diversity_native.pdf › Rarefaction_Plots/San Francisco_RarefactionPlot_Diversity_native.pdf]

SanJose

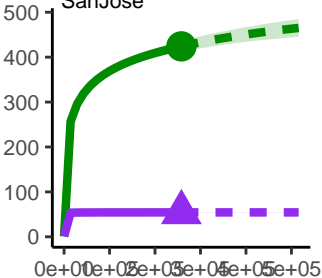

Supplement: fig2-data1 [file San Jose_RarefactionPlot_Diversity_all.pdf › Rarefaction_Plots/San Jose_RarefactionPlot_Diversity_all.pdf]

# SanJose

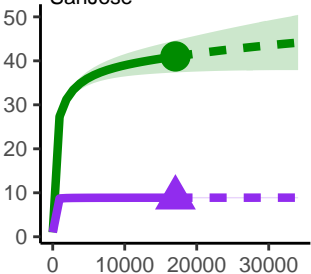

Supplement: fig2-data1 [file San Jose_RarefactionPlot_Diversity_native.pdf › Rarefaction_Plots/San Jose_RarefactionPlot_Diversity_native.pdf]

# SantaRosa

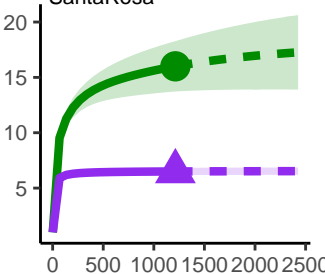

Supplement: fig2-data1 [file Santa Rosa_RarefactionPlot_Diversity_all.pdf › Rarefaction_Plots/Santa Rosa_RarefactionPlot_Diversity_all.pdf]

Seattle

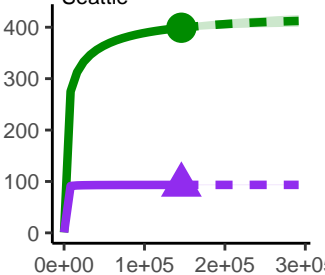

Supplement: fig2-data1 [file Seattle_RarefactionPlot_Diversity_all.pdf › Rarefaction_Plots/Seattle_RarefactionPlot_Diversity_all.pdf]

Seattle

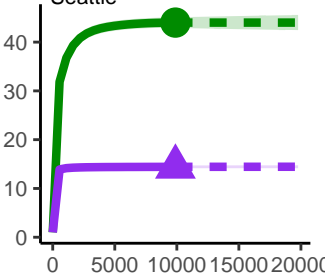

Supplement: fig2-data1 [file Seattle_RarefactionPlot_Diversity_native.pdf › Rarefaction_Plots/Seattle_RarefactionPlot_Diversity_native.pdf]

# Sioux Falls

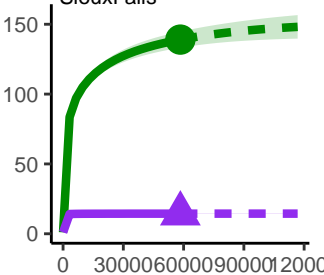

Supplement: fig2-data1 [file Sioux Falls_RarefactionPlot_Diversity_all.pdf › Rarefaction_Plots/Sioux Falls_RarefactionPlot_Diversity_all.pdf]

# Sioux Falls

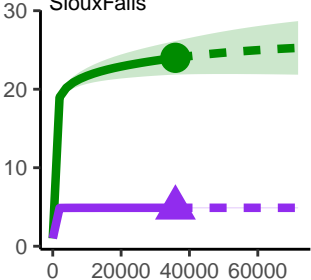

Supplement: fig2-data1 [file Sioux Falls_RarefactionPlot_Diversity_native.pdf › Rarefaction_Plots/Sioux Falls_RarefactionPlot_Diversity_native.pdf]

StLouis

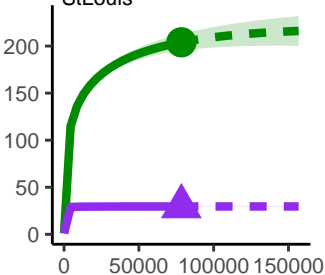

Supplement: fig2-data1 [file St. Louis_RarefactionPlot_Diversity_all.pdf › Rarefaction_Plots/St. Louis_RarefactionPlot_Diversity_all.pdf]

StLouis

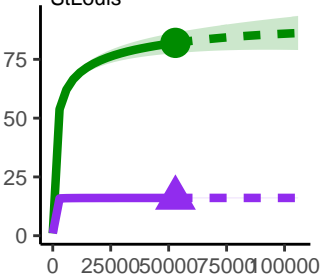

Supplement: fig2-data1 [file St. Louis_RarefactionPlot_Diversity_native.pdf › Rarefaction_Plots/St. Louis_RarefactionPlot_Diversity_native.pdf]

Stockton

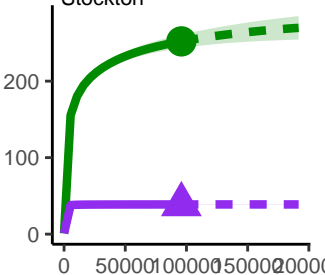

Supplement: fig2-data1 [file Stockton_RarefactionPlot_Diversity_all.pdf › Rarefaction_Plots/Stockton_RarefactionPlot_Diversity_all.pdf]

# Stockton

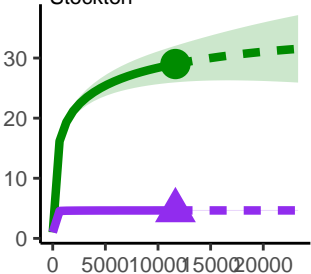

Supplement: fig2-data1 [file Stockton_RarefactionPlot_Diversity_native.pdf › Rarefaction_Plots/Stockton_RarefactionPlot_Diversity_native.pdf]

Tampa

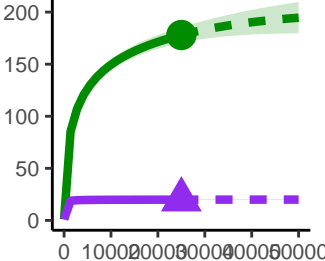

Supplement: fig2-data1 [file Tampa_RarefactionPlot_Diversity_all.pdf › Rarefaction_Plots/Tampa_RarefactionPlot_Diversity_all.pdf]

Tampa

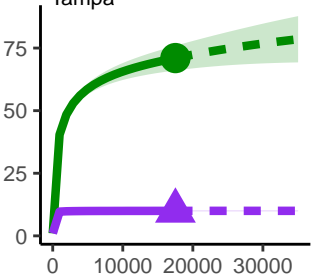

Supplement: fig2-data1 [file Tampa_RarefactionPlot_Diversity_native.pdf › Rarefaction_Plots/Tampa_RarefactionPlot_Diversity_native.pdf]

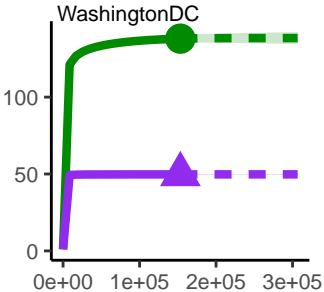

Supplement: fig2-data1 [file Washington (DC)_RarefactionPlot_Diversity_all.pdf › Rarefaction_Plots/Washington (DC)_RarefactionPlot_Diversity_all.pdf]

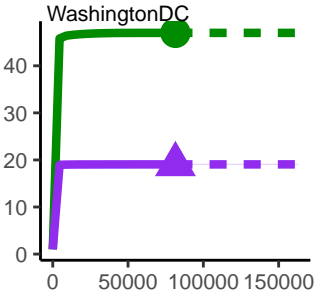

Supplement: fig2-data1 [file Washington (DC)_RarefactionPlot_Diversity_native.pdf › Rarefaction_Plots/Washington (DC)_RarefactionPlot_Diversity_native.pdf]

Worcester

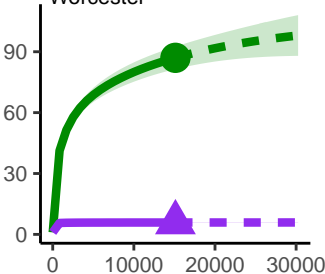

Supplement: fig2-data1 [file Worcester_RarefactionPlot_Diversity_all.pdf › Rarefaction_Plots/Worcester_RarefactionPlot_Diversity_all.pdf]

## Worcester

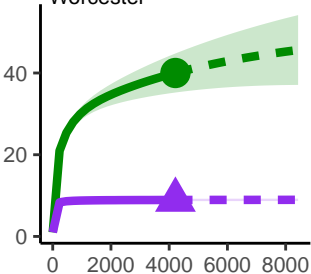

Supplement: fig2-data1 [file Worcester_RarefactionPlot_Diversity_native.pdf › Rarefaction_Plots/Worcester_RarefactionPlot_Diversity_native.pdf]
